# Supplementary material for: Catalytic reduction of trifluoromethylated alkyl bromides and synthesis of alkylated heterocycles under visible light irradiation: synergetic action of a halogen bond and Ni catalysis
Source: Royal Society of Chemistry journal article supplement (doi:10.1039/d4qo00966e), 2024-01-01

# Catalytic Reduction of Trifluoromethylated Alkyl Bromides and Synthesis of Alkylated Heterocycles under Visible Light Irradiation: Synergetic Action of a Halogen Bond and Ni Catalysis

Gai-Rong Wang,<sup>a</sup> Peng Guo,<sup>a</sup> Guoliang Pu,<sup>a</sup> Pan Wang,<sup>b</sup> An-Jun Wang,<sup>a</sup> Peijun Liu,<sup>a</sup> Jia Jia,<sup>a</sup> Xuefei Li,<sup>b\*</sup> and Chun-Yang He<sup>a, b, c\*</sup>

<sup>a</sup> Key Laboratory of Biocatalysis & Chiral Drug Synthesis of Guizhou Province, Generic Drug Research Center of Guizhou Province, School of Pharmacy, Zunyi Medical University, Zunyi, 563000, China.

<sup>b</sup> Department of Nuclear Medicine, Affiliated Hospital of Zunyi Medical University, Zunyi, Guizhou, P. R. China.

<sup>c</sup> Key Laboratory of Basic Pharmacology of Ministry of Education and Joint International Research Laboratory of Eth-nomedicine of Ministry of Education. School of Pharmacy, Zunyi Medical University, Zunyi, Guizhou, P.R. China.

## *Supporting Information*

\*E-mail: hechy2002@163.com

## List of Contents

|                                                                                                          |     |
|----------------------------------------------------------------------------------------------------------|-----|
| 1) General information                                                                                   | S03 |
| 2) General procedure for the synthesis of trifluoromethylated alkyl bromides                             | S03 |
| 3) Optimization of reaction conditions                                                                   | S04 |
| 4) General procedure for the Synthesis of alkylated trifluoromethyl compounds and alkylated heterocycles | S07 |
| 5) Procedure for the gram scale synthesis                                                                | S08 |
| 6) Mechanism studies                                                                                     | S09 |
| 7) Data for products <b>3</b> and <b>4</b>                                                               | S19 |
| 8) References                                                                                            | S42 |
| 9) Copies of NMR spectra of products <b>3</b> and <b>4</b>                                               | S44 |

## 1. General information.

$^1\text{H}$  NMR and  $^{13}\text{C}$  NMR spectra were recorded on an Agilent MR400 spectrometer.  $^{19}\text{F}$  NMR was recorded on an Agilent MR400 spectrometer. Chemical shifts ( $\delta$ ) are reported in ppm, and coupling constants ( $J$ ) are in Hertz (Hz). The following abbreviations were used to explain the multiplicities: s = singlet, d = doublet, t = triplet, q = quartet, m = multiplet, br = broad. NMR yield was determined by  $^{19}\text{F}$  NMR using fluorobenzene as an internal standard before working up the reaction. High-resolution mass spectra were recorded on a Thermo Scientific Q Exactive HF with Fourier-transform (orbitrap) mass spectrometer and Agilent Technologies 7250 GCQTOF in laboratory of mass spectrometry analysis at Shanghai Institute of Organic Chemistry. Melting points were taken on a SGW X-4 Melting Point Apparatus.

**Materials:** All reagents were used as received from commercial sources, unless specified otherwise, or prepared as described in the literature. Anhydrous solvents THF and commercially available reagents were used without purification. All reagents were weighed and handled in air at room temperature. The starting compounds **2** were obtained from commercial suppliers and were used as received without further purification. Blue LEDs (430-490 nm) were bought online (Peak Wavelength: 455.0 nm). LED (370-375 nm, 390-395 nm, 410-415 nm, 425-430 nm, 450-455 nm) were purchased from WATTCAS<sup>TM</sup>, and relevant experiments were performed in a WP-TEC-1020SL parallel reactor from WATTCAS<sup>TM</sup>.

## 2. General procedure for the synthesis of trifluoromethylated alkyl bromides.

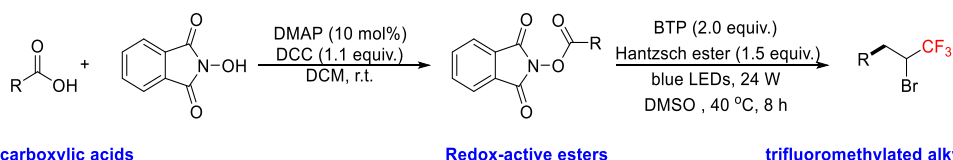

**Step 1:** Redox-active ester were prepared according to previous reported procedures [1]. The corresponding alkyl carboxylic acids or N-protected amino acids (5 mmol, 1.0 equiv.), N-hydroxyphthalimide (5 mmol, 1.0 equiv.), and 4-dimethylaminopyridine (0.5 mmol, 10 mol%) were mixed in a flask equipped with a magnetic stirring bar, and DCM

(20 mL) was added. Then, a solution of N, N'-dicyclohexylcarbodiimide (1135 mg, 5.5 mmol, 1.1 equiv.) in DCM (5 mL) was added slowly at room temperature. After complete conversion of N-hydroxyphthalimide traced by TLC, the white precipitate was filtered off and the solution was concentrated on a rotary evaporator. The residue was purified by silica gel chromatography to give corresponding redox active esters.

**Step 2:** Trifluoromethyl alkyl bromide were prepared according to previous reported procedures [2]. A 25 mL oven-dried Schlenk tube equipped with a magnetic stirrer bar was charged with the redox active esters (4 mmol, 1.0 equiv.), Hantzsch ester (6 mmol, 1.5 equiv.). The tube was evacuated and backfilled with argon for three times, followed by the addition of dry DMSO (25 mL) and 2-bromo-3,3,3-trifluoropropene (**BTP**) (8 mmol, 2.0 equiv.). The tube was screw capped and heated to 40°C (heat produced by blue LEDs) under irradiation of 24W blue LEDs (430-490 nm, peak wavelength:455.0 nm). After stirring for 8 h, the reaction mixture was then quenched with saturated NaCl solution and extracted with ethyl acetate. The organic layers were combined and concentrated on a rotary evaporator. The product was purified with silica gel chromatography to give corresponding pure product.

### 3. Reaction Conditions Optimization:

**Table S1. Screening ligand**

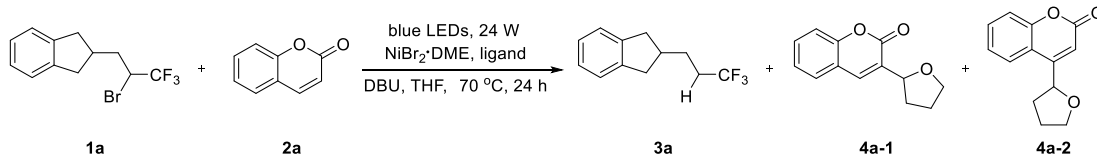

| Entry    | Ligand    | Yield ( <b>3a</b> , <b>4a-1</b> , <b>4a-2</b> ) <sup>b</sup> |
|----------|-----------|--------------------------------------------------------------|
| 1        | L1        | 20%, 19%, 16%                                                |
| 2        | L2        | 32%, 35%, 20%                                                |
| 3        | L3        | NR                                                           |
| 4        | L4        | NR                                                           |
| <b>5</b> | <b>L5</b> | <b>56%, 54%, 20%</b>                                         |
| 6        | L6        | Trace                                                        |
| 7        | L7        | NR                                                           |
| 8        | L8        | Trace                                                        |



|    |     |               |
|----|-----|---------------|
| 9  | L9  | NR            |
| 10 | L10 | 47%, 45%, 27% |
| 11 | L11 | 14%, 16%, 15% |
| 12 | L12 | Trace         |

<sup>a</sup> Reaction conditions (unless otherwise specified): **1a** (0.2 mmol), **2a** (0.1 mmol), NiBr<sub>2</sub>·DME (0.005 mmol), ligand (0.005 mmol), DBU (0.15mmol), THF (1.0 mL), 24 W blue LEDs, 70 °C, 24 h. <sup>b</sup> NMR yield of **3a**, which determined by <sup>19</sup>F NMR using fluorobenzene as internal standard and yield of isolated compounds **4a**.

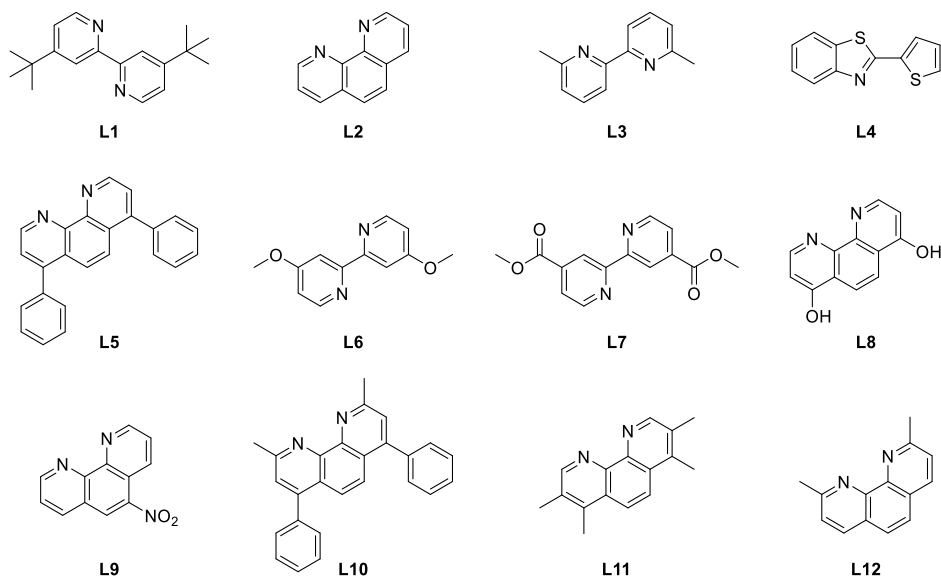

**Table S2. Screening base**

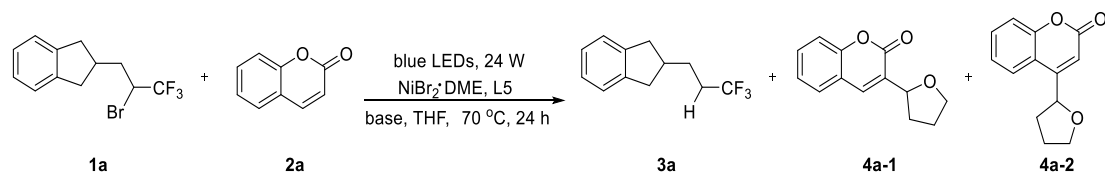

| Entry | Base                            | Yield ( <b>3a</b> , <b>4a-1</b> , <b>4a-2</b> ) <sup>b</sup> |
|-------|---------------------------------|--------------------------------------------------------------|
| 1     | DMAP                            | 17%, 19%, 11%                                                |
| 2     | N,N-dimethylpiperazine          | NR                                                           |
| 3     | <b>DBU</b>                      | <b>56%, 54%, 20%</b>                                         |
| 4     | DMPU                            | Trace                                                        |
| 5     | Et <sub>3</sub> N               | NR                                                           |
| 6     | K <sub>2</sub> CO <sub>3</sub>  | 27%, 30%, 12%                                                |
| 7     | K <sub>2</sub> HPO <sub>4</sub> | NR                                                           |
| 8     | NaOAc                           | NR                                                           |
| 9     | Cs <sub>2</sub> CO <sub>3</sub> | NR                                                           |

<sup>a</sup> Reaction conditions (unless otherwise specified): **1a** (0.2mmol), **2a** (0.1mmol), NiBr<sub>2</sub>·DME (0.005 mmol), L5 (0.005 mmol), base (0.15mmol), THF (1.0 mL), 24 W blue LEDs, 70 °C, 24 h. <sup>b</sup> NMR

yield of **3a**, which determined by  $^{19}\text{F}$  NMR using fluorobenzene as internal standard and yield of isolated compounds **4a**.

**Table S3. Screening Ni catalyst**

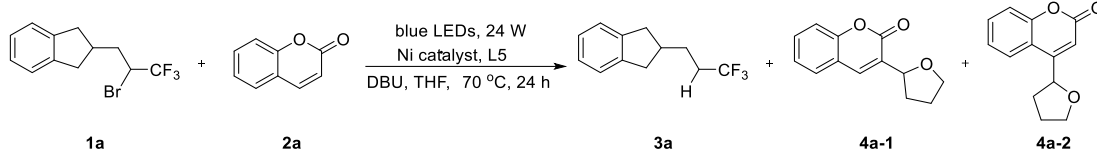

| Entry    | Ni catalyst                                           | Yield ( <b>3a</b> , <b>4a-1</b> , <b>4a-2</b> ) <sup>b</sup> |
|----------|-------------------------------------------------------|--------------------------------------------------------------|
| <b>1</b> | <b>Ni(OAc)<sub>2</sub>·4H<sub>2</sub>O</b>            | <b>58%, 56%, 26%</b>                                         |
| 2        | NiBr <sub>2</sub> ·DME                                | 56%, 54%, 20%                                                |
| 3        | NiBr <sub>2</sub>                                     | 54%, 52%, 19%                                                |
| 4        | NiCl <sub>2</sub>                                     | 51%, 52%, 20%                                                |
| 5        | Ni(BF <sub>4</sub> ) <sub>2</sub> ·6H <sub>2</sub> O  | 45%, 39%, 21%                                                |
| 6        | Ni(ClO <sub>4</sub> ) <sub>2</sub> ·6H <sub>2</sub> O | 49%, 50%, 17%                                                |
| 7        | Ni(acac) <sub>2</sub>                                 | 41%, 43%, 13%                                                |

<sup>a</sup> Reaction conditions (unless otherwise specified): **1a** (0.2mmol), **2a** (0.1mmol), Ni catalyst (0.005 mmol), L5 (0.005 mmol), DBU (0.15mmol), THF (1.0 mL), 24 W blue LEDs, 70 °C, 24 h. <sup>b</sup> NMR yield of **3a**, which determined by  $^{19}\text{F}$  NMR using fluorobenzene as internal standard and yield of isolated compounds **4a**.

**Table S4. Screening the amount of catalyst and ligand**

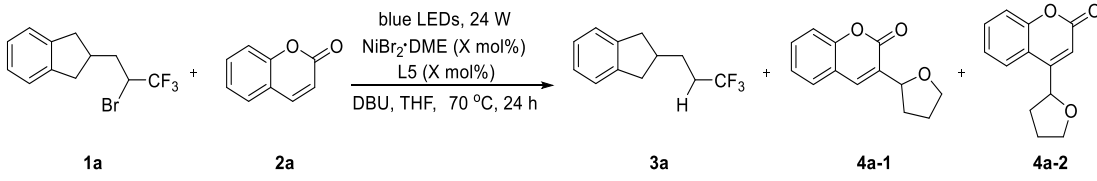

| Entry    | Cata&Ligand (X mol%, Compared with <b>1a</b> ) | Yield ( <b>3a</b> , <b>4a-1</b> , <b>4a-2</b> ) <sup>b</sup> |
|----------|------------------------------------------------|--------------------------------------------------------------|
| 1        | 1.25                                           | 34%, 33%, 12%                                                |
| <b>2</b> | <b>2.50</b>                                    | <b>58%, 56%, 26%</b>                                         |
| 3        | 3.75                                           | 45%, 45%, 13%                                                |
| 4        | 5.00                                           | 41%, 38%, 14%                                                |

<sup>a</sup> Reaction conditions (unless otherwise specified): **1a** (0.2mmol), **2a** (0.1mmol), DBU (0.15mmol), THF (1.0 mL), 24 W blue LEDs, 70 °C, 24 h. <sup>b</sup> NMR yield of **3a**, which determined by  $^{19}\text{F}$  NMR using fluorobenzene as internal standard and yield of isolated compounds **4a**.

**Table S5. Screening the amount of DBU**

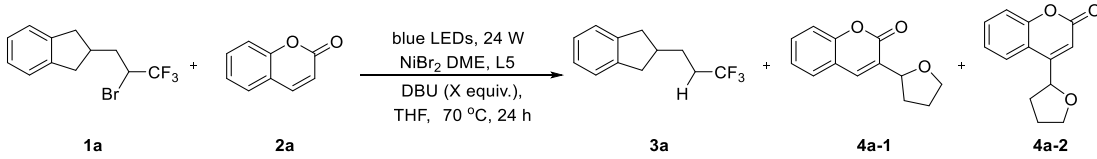

| Entry    | DBU (X equiv., compared with <b>1a</b> ) | Yield ( <b>3a</b> , <b>4a-1</b> , <b>4a-2</b> ) <sup>b</sup> |
|----------|------------------------------------------|--------------------------------------------------------------|
| <b>1</b> | <b>0.75</b>                              | <b>58%, 56%, 26%</b>                                         |
| 2        | 1.50                                     | 54%, 49%, 19%                                                |
| 3        | 2.25                                     | 54%, 51%, 18%                                                |

<sup>a</sup> Reaction conditions (unless otherwise specified): **1a** (0.2mmol), **2a** (0.1mmol), Ni(OAc)<sub>2</sub>·4H<sub>2</sub>O (0.005 mmol), L5 (0.005 mmol), THF (1.0 mL), 24 W blue LEDs, 70 °C, 24 h. <sup>b</sup> NMR yield of **3a**, which determined by <sup>19</sup>F NMR using fluorobenzene as internal standard and yield of isolated compounds **4a**.

**Table S6. Screening wavelength (nm)**

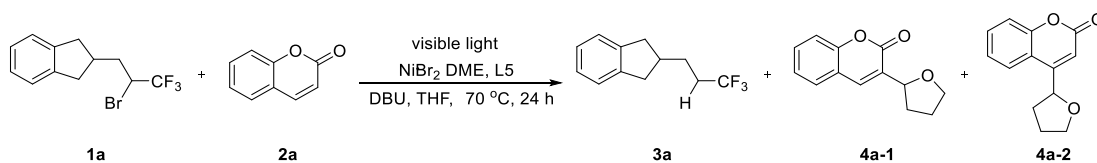

| Entry    | wavelength (nm) | Yield ( <b>3a</b> , <b>4a-1</b> , <b>4a-2</b> ) <sup>b</sup> |
|----------|-----------------|--------------------------------------------------------------|
| 1        | 370-375         | NR                                                           |
| 2        | 390-395         | 63%, 44%, 24%                                                |
| <b>3</b> | <b>410-415</b>  | <b>97%, 55%, 26%</b>                                         |
| 4        | 425-430         | 76%, 52%, 24%                                                |
| 5        | 450-455         | 63%, 46%, 15%                                                |
| 6        | 470-475         | 64%, 48%, 18%                                                |

<sup>a</sup> Reaction conditions (unless otherwise specified): **1a** (0.2mmol), **2a** (0.1mmol), Ni(OAc)<sub>2</sub>·4H<sub>2</sub>O (0.005 mmol), L5 (0.005 mmol), DBU (0.15mmol), THF (1.0 mL), 30°C, 24 h. <sup>b</sup> NMR yield of **3a**, which determined by <sup>19</sup>F NMR using fluorobenzene as internal standard and yield of isolated compounds **4a**.

#### 4. General procedure for the synthesis of alkylated trifluoromethyl compounds and alkylated heterocycles.

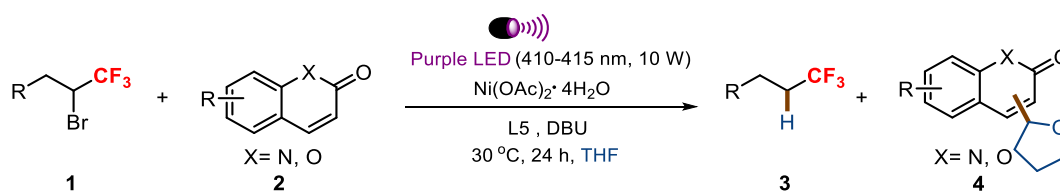

**General procedure:** A 25 mL oven-dried Schlenk tube equipped with a magnetic stirrer bar was charged with compound **1** (0.2 mmol), compound **2** (0.1 mmol), Ni(OAc)<sub>2</sub>·4H<sub>2</sub>O (0.005 mmol), L5 (0.005 mmol). The tube was evacuated and backfilled with argon for three times, followed by the addition of dry THF (1.0 mL) and DBU (0.15 mmol). The tube was screw capped and heated to 30°C under irradiation

of Purple LEDs (410-415 nm, 10 W, the set-up is detailed in Figure S1). After stirring for 24 h, the reaction mixture was concentrated on a rotary evaporator. The product was purified with silica gel chromatography to give corresponding pure product.

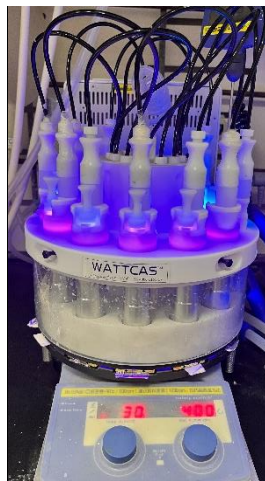

**Figure S1.** Experiment set-up

## 5. Detailed procedure for the gram scale synthesis.

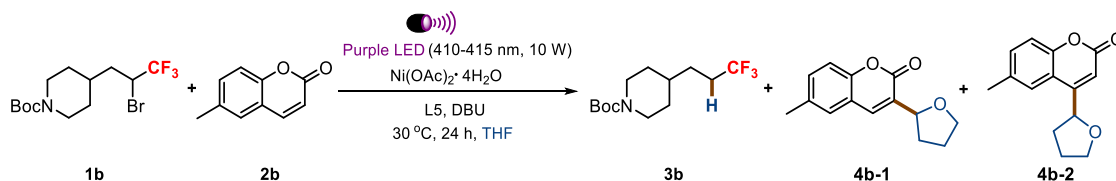

**General procedure:** A 100 mL oven-dried Schlenk tube equipped with a magnetic stirrer bar was charged with compound **1b** (15 mmol), coumarin **2b** (7.5 mmol), Ni(OAc)<sub>2</sub>·4H<sub>2</sub>O (0.375 mmol), L5 (0.375 mmol). The tube was evacuated and backfilled with argon for three times, followed by the addition of dry THF (35.0 mL) and DBU (11.25 mmol). The tube was screw capped and heated to 30°C under irradiation of Purple LEDs (410-415 nm, 10 W, the set-up is detailed in Figure S2). After stirring for 48 h, the reaction mixture was concentrated on a rotary evaporator. The product **3b** (78%, 3.29 g), **4b-1** (62%, 1.09 g) and **4b-2** (20%, 0.34 g) were purified with silica gel chromatography (PE:EA=15:1 to 10:1) as white solid.

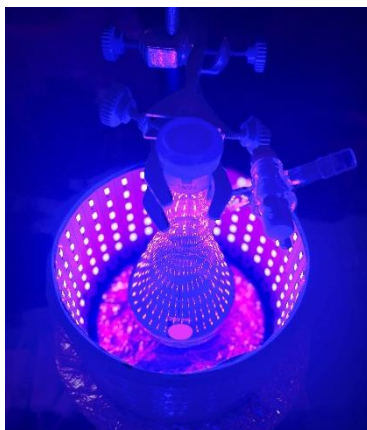

**Figure S2.** Experiment set-up

## 6. Mechanism studies

### 6.1 Addition of radical and SET inhibitors

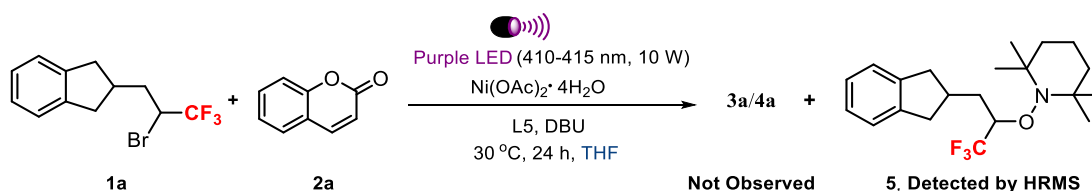

**Procedure:** A 25 mL oven-dried Schlenk tube equipped with a magnetic stirrer bar was charged with **1a** (0.2 mmol), **2a** (0.1 mmol), Ni(OAc)<sub>2</sub>·4H<sub>2</sub>O (0.005 mmol), L5 (0.005 mmol), TEMPO (0.2 mmol). The tube was evacuated and backfilled with argon for three times, followed by the addition of dry THF (1.0 mL) and DBU (0.15 mmol). The tube was screw capped and heated to 30°C under irradiation of Purple LEDs (410-415 nm, 10 W). After stirring for 24 h, the reaction mixture was cooled to room temperature, monitored by TLC, pretreated and sent for HRMS analysis.

**High resolution ESI-MS and MS/MS experiments** for detecting TEMPO complex: High resolution ESI-MS and MS/MS spectra were recorded on a Q Exactive HF Orbitrap mass spectrometer (Thermo Fisher Scientific Inc.) equipped with ESI ion source. The ESI conditions were: spray voltage 3500 V; capillary temperature, 275°C; sheath gas flow rate 35 arb. units. Data acquisition and analysis were done with the Thermo Xcalibur (version 4.2.47) software package. The reaction was completely suppressed by the addition of a radical scavenger TEMPO, which suggests the potential involvement of radical intermediates during the reaction.

The elemental composition analysis of the ion at  $m/z$  370.2347 by HRMS (Figure S3 and S4) supported the proposed structure of TEMPO complex (5).

WGR-3-33 #21 RT: 0.09 AV: 1 NL: 3.46E8  
T: FTMS + p ESI Full ms [100.0000-1000.00]

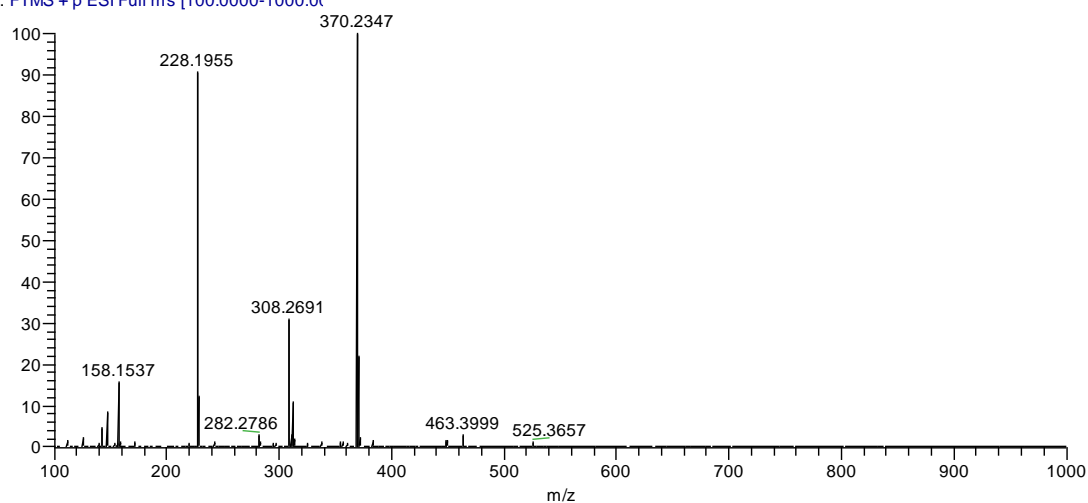

**Figure S3.** High resolution ESI-MS spectrum of TEMPO complex calculated for  $C_{21}H_{31}ONF_3$   
([M+H]<sup>+</sup>): 370.2352; Found: 370.2347.

Elemental composition search on mass 370.2347

$m/z = 365.2347-375.2347$

| $m/z$    | Theo. Mass | Delta (ppm) | RDB equiv. | Composition         |
|----------|------------|-------------|------------|---------------------|
| 370.2347 | 370.2352   | -1.39       | 5.5        | $C_{21}H_{31}ONF_3$ |

**Figure S4.** Elemental composition analysis of the ion at  $m/z$  370.

## 6.2 Control experiment:

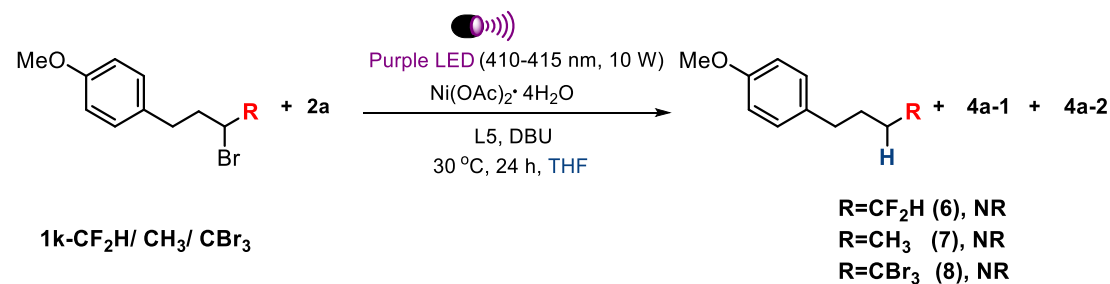

**Procedure A:** A 25 mL oven-dried Schlenk tube equipped with a magnetic stirrer bar was charged with **1k-CF<sub>2</sub>H** (0.2 mmol), **2a** (0.1 mmol), Ni(OAc)<sub>2</sub>·4H<sub>2</sub>O (0.005 mmol),

L5 (0.005 mmol). The tube was evacuated and backfilled with argon for three times, followed by the addition of dry THF (1.0 mL) and DBU (0.15 mmol). The tube was screw capped and heated to 30°C under irradiation of Purple LEDs (410-415 nm, 10 W). After stirring for 24 h, the reaction monitored by TLC, no target products **6** and **4a** were detected.

**Procedure B:** A 25 mL oven-dried Schlenk tube equipped with a magnetic stirrer bar was charged with **1k-CH<sub>3</sub>** (0.2 mmol), **2a** (0.1 mmol), Ni(OAc)<sub>2</sub>·4H<sub>2</sub>O (0.005 mmol), L5 (0.005 mmol). The tube was evacuated and backfilled with argon for three times, followed by the addition of dry THF (1.0 mL) and DBU (0.15 mmol). The tube was screw capped and heated to 30°C under irradiation of Purple LEDs (410-415 nm, 10 W). After stirring for 24 h, the reaction monitored by TLC, no target products **7** and **4a** were detected.

**Procedure C:** A 25 mL oven-dried Schlenk tube equipped with a magnetic stirrer bar was charged with **1k-CBr<sub>3</sub>** (0.2 mmol), **2a** (0.1 mmol), Ni(OAc)<sub>2</sub>·4H<sub>2</sub>O (0.005 mmol), L5 (0.005 mmol). The tube was evacuated and backfilled with argon for three times, followed by the addition of dry THF (1.0 mL) and DBU (0.15 mmol). The tube was screw capped and heated to 30°C under irradiation of Purple LEDs (410-415 nm, 10 W). After stirring for 24 h, the reaction monitored by TLC, no target products **8** and **4a** were detected.

Control experiments were performed by substituting the trifluoromethyl group with less electronegative analogues, such as CF<sub>2</sub>H, CH<sub>3</sub>, or CBr<sub>3</sub> substituents. However, these substitutions failed to yield the desired product, emphasizing the remarkable and pivotal role played by the trifluoromethyl group in facilitating this transformation.

#### Procedure for the synthesis of **1k-CF<sub>2</sub>H**:

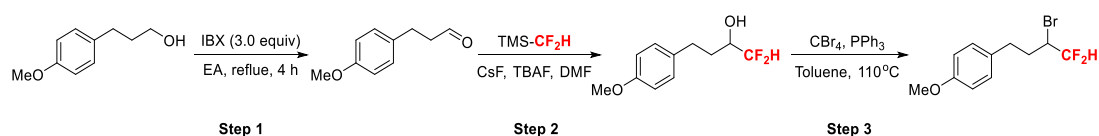

**Step 1:** Oxidation of the alcohol <sup>[3]</sup>. The primary alcohol (20 mmol) was dissolved in EtOAc (140 mL), and IBX (60 mmol, 16.8 g) was carefully added. The suspension was

heated to reflux for 4 h, and then the precipitate was removed via filtration. The EtOAc was then concentrated under vacuum, yielding the corresponding aldehyde in quantitative yield, which was subsequently utilized in the next step.

**Step 2:** Difluoromethylation of the aldehyde <sup>[4]</sup>. Add CsF (10 mg, 0.07 mmol) to a solution of 4-methoxybenzaldehyde (3 mmol) and TMS-CF<sub>2</sub>H (2 mmol) in 6 mL of DMF under N<sub>2</sub> atmosphere. Stir the mixture at room temperature overnight. Add a solution of TBAF (1.5 ml, 1M in THF) to the reaction mixture. Stir the whole mixture for another 1 hour. Extract the reaction mixture with Et<sub>2</sub>O and H<sub>2</sub>O. Wash the organic phase with brine, then dry the organic phase using anhydrous MgSO<sub>4</sub>. Filter the solution and evaporate the solvent under vacuum. Purify the residue through silica gel column chromatography.

**Step 3:** Bromination of the alcohol <sup>[5]</sup>. PPh<sub>3</sub> (2 mmol, 2.0 equiv.) and CBr<sub>4</sub> (2 mmol, 2.0 equiv.) were added to a solution of the alcohol (1.0 mmol) in 2.5 mL toluene. The resulting mixture was heated to 110 °C and stirred for 3 h, at which time it had turned into a yellow suspension. Then, DCM (5 mL) was added to the reaction mixture until it became a clear solution. The solvents were then evaporated, and the crude product was purified by flash chromatography on silica gel.

### Procedure for the synthesis of 1k-CH<sub>3</sub>:

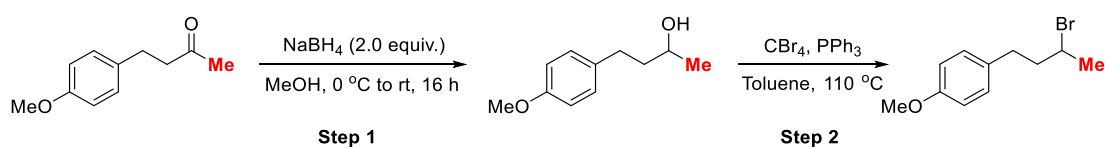

**Step 1:** Reduction of the ketone to the alcohol. 4-(4-methoxyphenyl)butan-2-one (5.6 mmol, 1.0 equiv.) was dissolved in MeOH (10 mL) in a round bottom flask and placed at 0°C. Then sodium borohydride (11.2 mmol, 2.0 equiv.) was added to the solution by little portion at 0°C and the mixture was allowed to rise to room temperature, stirring overnight (16 h). Then 1 mL of acetic acid was added and the mixture was stirred briefly. A saturated solution of NaHCO<sub>3</sub> was then added (10 mL). The phases were separated and the aqueous layer was extract with ethyl acetate (10 mL x 3). The combined organic layers were washed with brine, dried over anhydrous Na<sub>2</sub>SO<sub>4</sub>, filtered and concentrated



under vacuum. The product was purified with silica gel chromatography to give corresponding pure product. **Step 2:** As mentioned above.

### Procedure for the synthesis of 1k-CBr<sub>3</sub>:

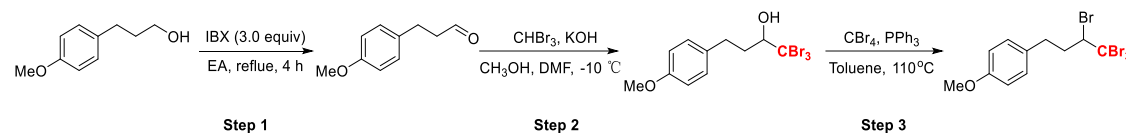

**Step 1:** As mentioned above.

**Step 2:** Tribromomethylation of aldehydes of the aldehyde [6]. At -10°C, a MeOH solution (20 mL) of KOH (0.5 mmol, 0.1 equiv.) was added dropwise to a DMF (7.5 mL) solution containing aldehyde (5 mmol, 1.0 equiv.) and CHBr<sub>3</sub> (11 mmol, 2.2 equiv.). The reaction progress was monitored using TLC. After complete conversion, the reaction mixture was treated with HCl (1M, 5-10 mL). After 10 minutes, ethyl acetate (EA, 10-20 mL) was added, left to stand for 30 minutes, and then extracted with ethyl acetate. The crude product obtained could be directly used for the next step.

**Step 3:** As mentioned above.

### 6.3 D-labeled experiment:

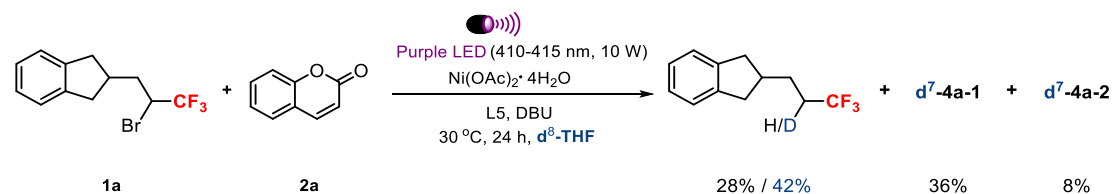

**Procedure:** A 25 mL oven-dried Schlenk tube equipped with a magnetic stirrer bar was charged with **1a** (0.2 mmol), **2a** (0.1 mmol), Ni(OAc)<sub>2</sub>·4H<sub>2</sub>O (0.005 mmol), L5 (0.005 mmol). The tube was evacuated and backfilled with argon for three times, followed by the addition of d<sup>8</sup>-THF (1.0 mL) and DBU (0.15 mmol). The tube was screw capped and heated to 30°C under irradiation of Purple LEDs (410-415 nm, 10 W). After stirring for 24 h, the reaction mixture was concentrated on a rotary evaporator. The product was purified with silica gel chromatography to give corresponding product.

7.260  
7.237  
7.225  
7.214  
7.202  
7.193  
7.181  
7.168  
7.160  
7.146  
4.191  
4.173  
3.210  
3.191  
3.172  
3.153  
3.145  
3.124  
3.105  
3.086  
3.066  
2.826  
2.733  
2.695  
2.651  
2.631  
2.613  
2.593  
2.561  
2.541  
2.533  
2.513  
2.494  
2.475  
2.209  
2.186  
2.168  
2.149  
2.141  
1.820  
1.803  
1.783

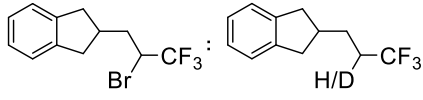

0.3 : 0.7

<sup>1</sup>H NMR (400 MHz, CDCl<sub>3</sub>)

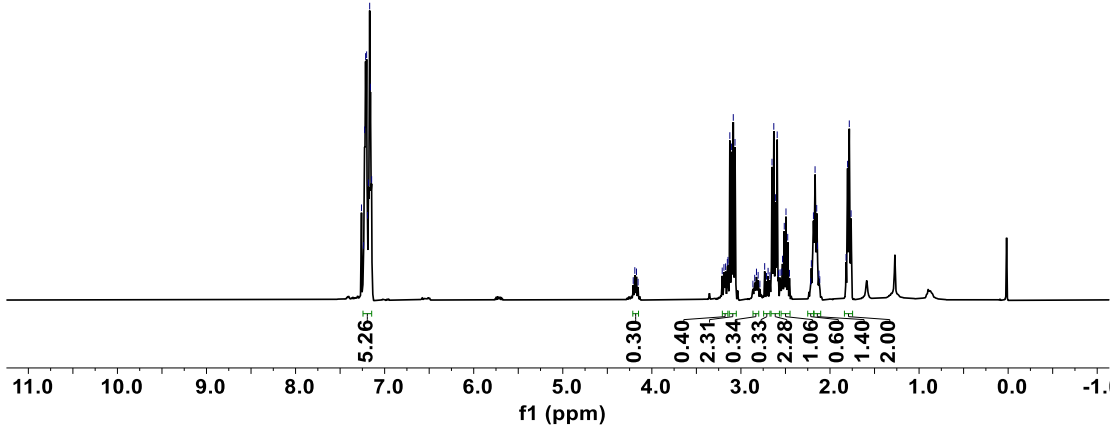

-66.376  
-66.404  
-66.433  
-66.478  
-66.507  
-72.412  
-72.431

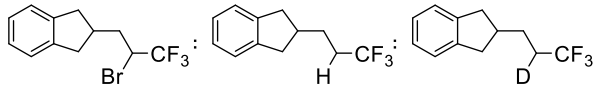

0.30 : 0.28 : 0.42

<sup>19</sup>F NMR (376 MHz, CDCl<sub>3</sub>)

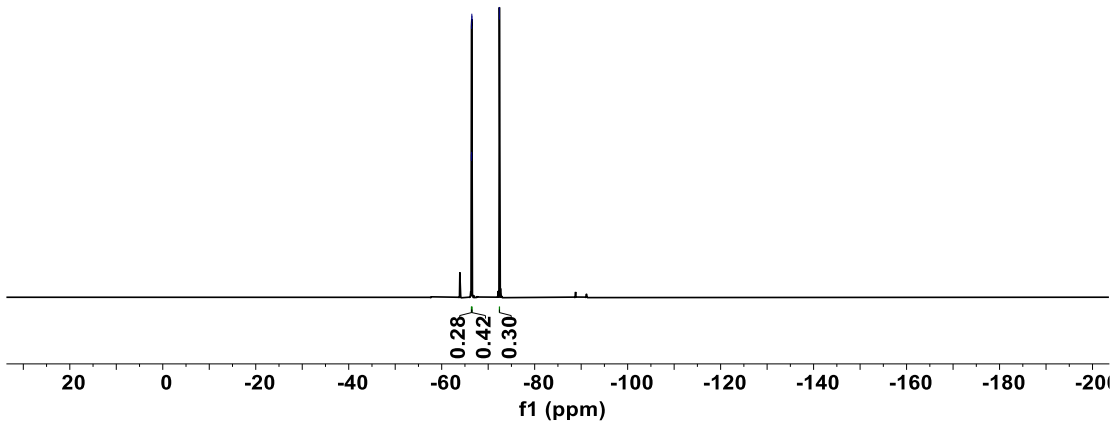

7.772  
7.476  
7.457  
7.440  
7.311  
7.290  
7.260  
7.241  
7.228

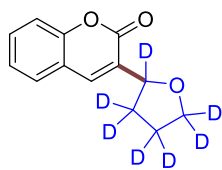

**d<sup>7</sup>-4a-1**

<sup>1</sup>H NMR (400 MHz, CDCl<sub>3</sub>)

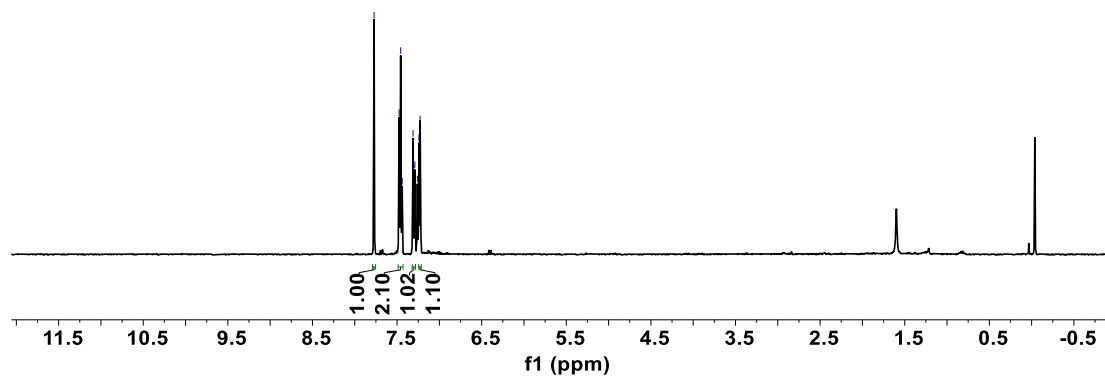

7.549  
7.531  
7.523  
7.510  
7.502  
7.377  
7.356  
7.302  
7.282  
7.260  
6.594

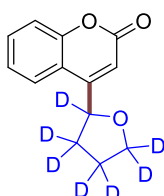

**d<sup>7</sup>-4a-2**

<sup>1</sup>H NMR (400 MHz, CDCl<sub>3</sub>)

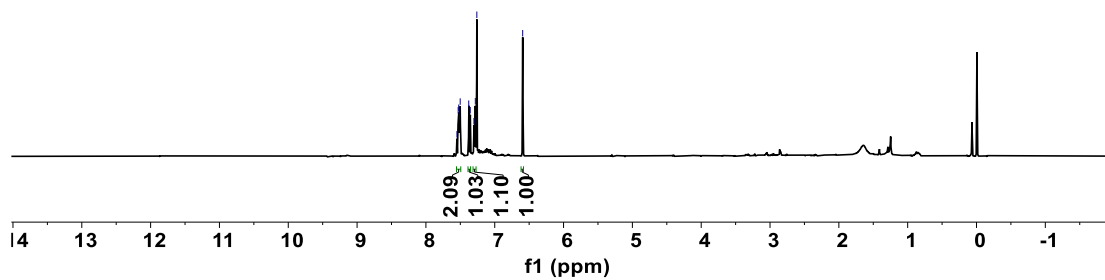

#### 6.4 UV-vis spectroscopic measurement:

Solution 1: **Ni(OAc)<sub>2</sub>·4H<sub>2</sub>O** (1.24 mg, 0.005 mmol) was added in THF (10 mL).

Solution 2: **L5** (1.61 mg, 0.005 mmol) was added in THF (10 mL).

Solution 3: **Ni(OAc)<sub>2</sub>·4H<sub>2</sub>O** (1.24 mg, 0.005 mmol) and **L5** (1.61 mg, 0.005 mmol) were added in THF (10 mL).

Solution 4: **Ni(OAc)<sub>2</sub>·4H<sub>2</sub>O** (1.24 mg, 0.005 mmol), **L5** (1.61 mg, 0.005 mmol) and **DBU** (0.15 mmol, 30 eq.) were added in THF (10 mL).

Solution 5: **Ni(OAc)<sub>2</sub>·4H<sub>2</sub>O** (1.24 mg, 0.005 mmol), **L5** (1.61 mg, 0.005 mmol), **DBU** (0.15 mmol, 30 eq.) and **1a** (0.20 mmol, 40 eq.) were added in THF (10 mL).

Solution 6: **DBU** (0.15 mmol, 30 eq.) was added in THF (10 mL).

Solution 7: **1a** (0.20 mmol, 40 eq.) was added in THF (10 mL).

Solution 8: **DBU** (0.15 mmol, 30 eq.) and **1a** (0.20 mmol, 40 eq.) were added in THF (10 mL).

These solutions were stirred at room temperature for 20 minutes and then filtered for measurement.

| $\lambda$ (nm) \ A | Ni(OAc) <sub>2</sub> ·4H <sub>2</sub> O | L5    | Ni+L5 | Ni+L5+DBU | Ni+L5+DBU+1a | DBU   | 1a    | DBU+1a |
|--------------------|-----------------------------------------|-------|-------|-----------|--------------|-------|-------|--------|
| 330                | 0.024                                   | 1.134 | 1.944 | 2.023     | 2.223        | 0.067 | 0.009 | 0.090  |
| 340                | 0.007                                   | 0.501 | 1.428 | 1.466     | 2.012        | 0.036 | 0.012 | 0.090  |
| 350                | 0.007                                   | 0.212 | 0.843 | 0.912     | 1.364        | 0.032 | 0.006 | 0.109  |
| 360                | 0.004                                   | 0.054 | 0.649 | 0.722     | 1.079        | 0.026 | 0.005 | 0.108  |
| 370                | 0.004                                   | 0.016 | 0.262 | 0.366     | 0.583        | 0.017 | 0.007 | 0.096  |
| 380                | 0.008                                   | 0.012 | 0.156 | 0.239     | 0.401        | 0.014 | 0.005 | 0.086  |
| 390                | 0.010                                   | 0.01  | 0.111 | 0.176     | 0.309        | 0.013 | 0.004 | 0.077  |
| 400                | 0.011                                   | 0.007 | 0.083 | 0.128     | 0.238        | 0.012 | 0.003 | 0.067  |
| 410                | 0.010                                   | 0.007 | 0.061 | 0.091     | 0.177        | 0.012 | 0.002 | 0.057  |
| 420                | 0.009                                   | 0.006 | 0.047 | 0.071     | 0.137        | 0.012 | 0.002 | 0.046  |
| 430                | 0.008                                   | 0.006 | 0.035 | 0.055     | 0.103        | 0.011 | 0.001 | 0.035  |
| 440                | 0.008                                   | 0.005 | 0.026 | 0.043     | 0.081        | 0.010 | 0.000 | 0.028  |
| 450                | 0.007                                   | 0.005 | 0.020 | 0.035     | 0.065        | 0.010 | 0.000 | 0.023  |
| 460                | 0.006                                   | 0.005 | 0.016 | 0.030     | 0.053        | 0.009 | 0.000 | 0.019  |
| 470                | 0.006                                   | 0.005 | 0.013 | 0.024     | 0.044        | 0.009 | 0.000 | 0.017  |
| 480                | 0.005                                   | 0.004 | 0.011 | 0.021     | 0.037        | 0.008 | 0.001 | 0.014  |
| 490                | 0.006                                   | 0.004 | 0.010 | 0.019     | 0.032        | 0.008 | 0.001 | 0.012  |
| 500                | 0.006                                   | 0.005 | 0.010 | 0.017     | 0.027        | 0.009 | 0.000 | 0.010  |
| 510                | 0.006                                   | 0.004 | 0.009 | 0.016     | 0.024        | 0.008 | 0.000 | 0.008  |
| 520                | 0.005                                   | 0.005 | 0.009 | 0.016     | 0.022        | 0.008 | 0.000 | 0.008  |
| 530                | 0.006                                   | 0.006 | 0.011 | 0.016     | 0.021        | 0.008 | 0.002 | 0.008  |
| 540                | 0.007                                   | 0.005 | 0.010 | 0.016     | 0.019        | 0.009 | 0.001 | 0.007  |
| 550                | 0.007                                   | 0.006 | 0.01  | 0.015     | 0.018        | 0.008 | 0.003 | 0.007  |
| 560                | 0.006                                   | 0.005 | 0.011 | 0.016     | 0.018        | 0.009 | 0.003 | 0.008  |
| 570                | 0.006                                   | 0.004 | 0.011 | 0.016     | 0.017        | 0.007 | 0.003 | 0.007  |
| 580                | 0.007                                   | 0.005 | 0.012 | 0.015     | 0.017        | 0.007 | 0.003 | 0.007  |

|     |       |       |       |       |       |       |       |       |
|-----|-------|-------|-------|-------|-------|-------|-------|-------|
| 590 | 0.006 | 0.005 | 0.012 | 0.015 | 0.016 | 0.008 | 0.003 | 0.007 |
| 600 | 0.006 | 0.004 | 0.012 | 0.014 | 0.016 | 0.008 | 0.003 | 0.007 |
| 610 | 0.007 | 0.004 | 0.012 | 0.014 | 0.014 | 0.007 | 0.003 | 0.007 |
| 620 | 0.007 | 0.004 | 0.012 | 0.014 | 0.014 | 0.007 | 0.003 | 0.007 |
| 630 | 0.007 | 0.004 | 0.013 | 0.013 | 0.013 | 0.007 | 0.004 | 0.007 |
| 640 | 0.006 | 0.003 | 0.012 | 0.013 | 0.012 | 0.007 | 0.003 | 0.007 |
| 650 | 0.007 | 0.003 | 0.012 | 0.012 | 0.011 | 0.007 | 0.003 | 0.007 |
| 660 | 0.007 | 0.003 | 0.011 | 0.011 | 0.010 | 0.006 | 0.003 | 0.007 |

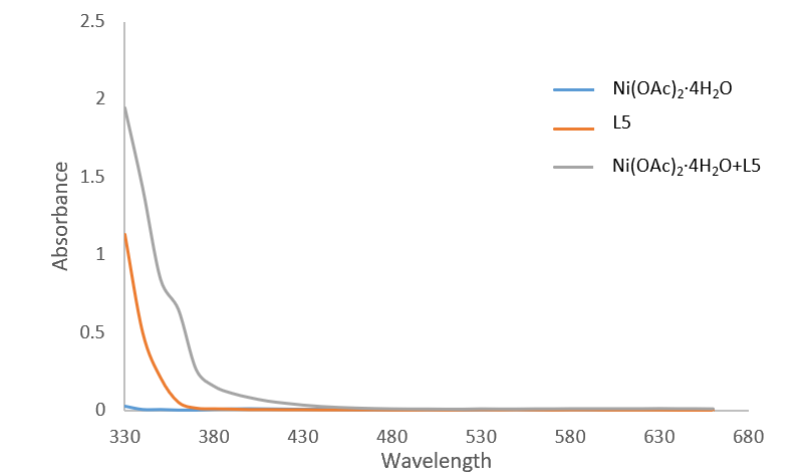

**Figure S5.** Absorption spectrum of  $\text{Ni}(\text{OAc})_2 \cdot 4\text{H}_2\text{O} + \text{L5}$  [  $\text{Ni}(\text{OAc})_2 \cdot 4\text{H}_2\text{O}$   $5.0 \times 10^{-4}$  M; 2 mm pathlength quartz cuvette] in THF.

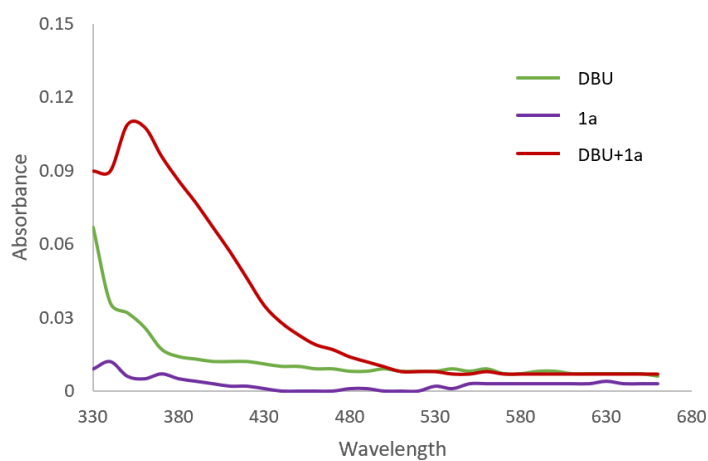

**Figure S6.** Absorption spectrum of DBU + 1a (2 mm pathlength quartz cuvette) in THF.

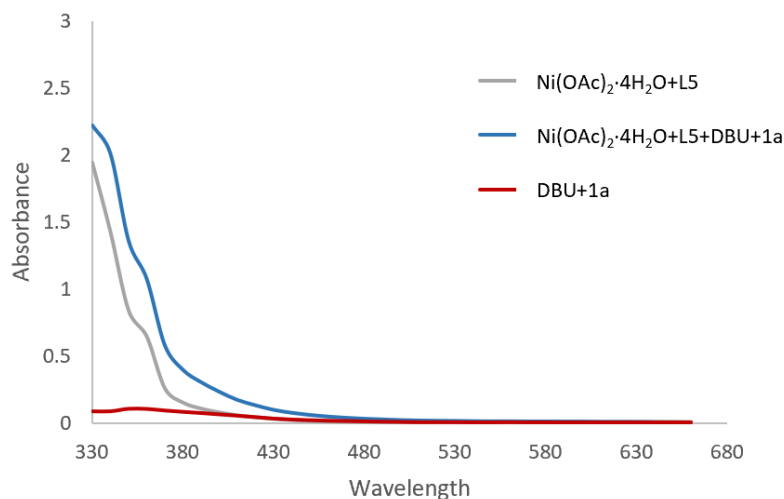

**Figure S7.** Absorption spectrum of  $\text{Ni}(\text{OAc})_2 \cdot 4\text{H}_2\text{O}$ , L5, DBU and **1a** [ $\text{Ni}(\text{OAc})_2 \cdot 4\text{H}_2\text{O}$   $5.0 \times 10^{-4}$  M; 2 mm pathlength quartz cuvette] in THF.

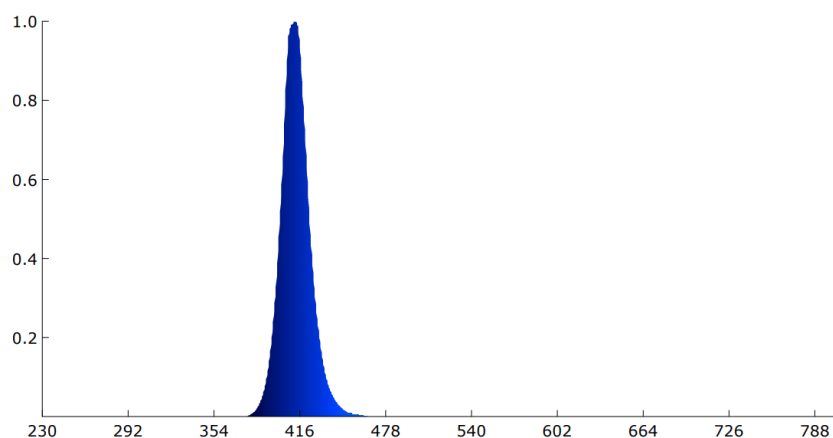

**Figure S8.** Emission spectra of purple LEDs used for photochemical reactions ( $\lambda_{\text{max}}=413$  nm).

### 6.5 Light on/off experiment:

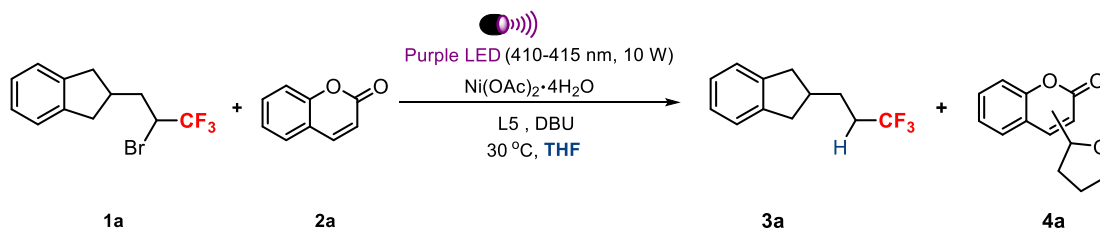

**Procedure:** A 25 mL oven-dried Schlenk tube equipped with a magnetic stirrer bar was charged with **1a** (0.4 mmol), **2a** (0.2 mmol),  $\text{Ni}(\text{OAc})_2 \cdot 4\text{H}_2\text{O}$  (0.01 mmol), L5 (0.01 mmol). The tube was evacuated and backfilled with argon for three times, followed by

the addition of dry THF (2.0 mL) and DBU (0.3 mmol). The tube was screw capped and heated to 30 °C (heat produced by purple LED) under irradiation of purple LED (410-415 nm, with cooling fan to keep the reaction temperature near 30 °C). At constant temperature, alternating light and dark reactions were performed every 2 hours, and samples were taken to monitor the yield, benzene fluoride was used as the internal standard, and ethyl acetate was used to dilute, and the yield of **3a** was detected by crude  $^{19}\text{F}$  NMR.

**Table S7.** The yield of product **3a** with light on/off at different time.

| Entry | Time (h) | Yield (%) |
|-------|----------|-----------|
| 1     | 2        | 17        |
| 2     | 4        | 17        |
| 3     | 6        | 25        |
| 4     | 8        | 25        |
| 5     | 10       | 39        |
| 6     | 12       | 39        |
| 7     | 14       | 45        |
| 8     | 16       | 45        |

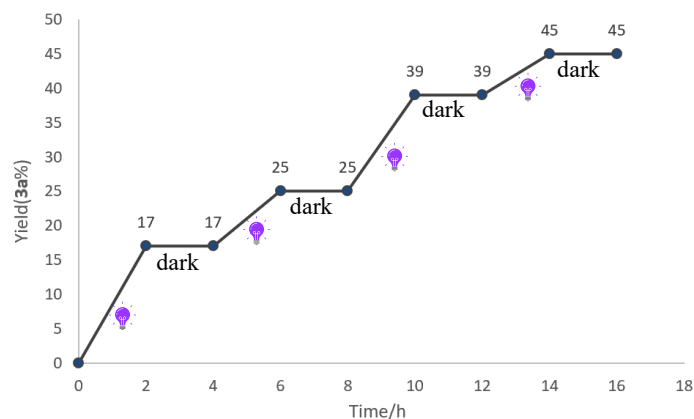

**Figure S9.** Light on/off experiment

## 7. Characterization data for the products.

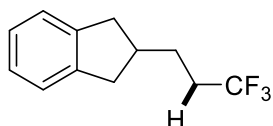

**2-(3,3,3-trifluoropropyl)-2,3-dihydro-1*H*-indene (3a)**

The product **3a** (38.6 mg, 90% yield) was purified with silica gel chromatography as white solid, mp: 46 – 47 °C, **4a-1** (11.9 mg, 55% yield) and **4a-2** (5.6 mg, 26% yield) were isolated simultaneously, eluent: (PE:EA=1:0 to 10:1). **<sup>1</sup>H NMR** (400 MHz, CDCl<sub>3</sub>) δ 7.24 – 7.21 (m, 2H), 7.19 – 7.15 (m, 2H), 3.11 (dd, *J* = 15.2, 7.6 Hz, 2H), 2.63 (dd, *J* = 15.6, 8.2 Hz, 2H), 2.56 – 2.47 (m, 1H), 2.25 – 2.13 (m, 2H), 1.83 – 1.77 (m, 2H); **<sup>13</sup>C NMR** (101 MHz, CDCl<sub>3</sub>) δ 142.7, 127.2 (q, *J* = 277.5 Hz), 126.3, 124.4, 39.0, 38.9, 32.7 (q, *J* = 28.6 Hz), 27.6 (q, *J* = 2.7 Hz); **<sup>19</sup>F NMR** (376 MHz, CDCl<sub>3</sub>) δ -66.41 (t, *J* = 10.9 Hz, 3F). **HRMS** (EI) *m/z*: [M]<sup>+</sup> Calcd for C<sub>12</sub>H<sub>13</sub>F<sub>3</sub>: 214.0964; Found: 214.0969.

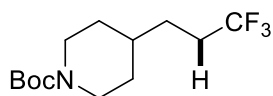

**tert-butyl 4-(3,3,3-trifluoropropyl)piperidine-1-carboxylate (3b)**

The product **3b** (49.5 mg, 88% yield) was purified with silica gel chromatography as white solid, mp: 33 – 34 °C, **4a-1** (13.0 mg, 60% yield) and **4a-2** (4.8 mg, 22% yield) were isolated simultaneously, eluent: (PE:EA=20:1 to 10:1). **<sup>1</sup>H NMR** (400 MHz, CDCl<sub>3</sub>) δ 4.08 (br, 2H), 2.66 (t, *J* = 12.4 Hz, 2H), 2.14 – 2.01 (m, 2H), 1.64 (d, *J* = 12.8 Hz, 2H), 1.52 – 1.46 (m, 2H), 1.44 (s, 10H), 1.15 – 1.04 (m, 2H); **<sup>13</sup>C NMR** (101 MHz, CDCl<sub>3</sub>) δ 154.8, 127.2 (q, *J* = 277.5 Hz), 79.4, 43.5 (br), 35.1, 31.7, 31.0 (q, *J* = 28.6 Hz), 28.4, 28.3 (q, *J* = 2.8 Hz); **<sup>19</sup>F NMR** (376 MHz, CDCl<sub>3</sub>) δ -66.52 (t, *J* = 10.7 Hz, 3F). **HRMS** (ESI) *m/z*: [M+H-C<sub>4</sub>H<sub>8</sub>]<sup>+</sup> Calcd for C<sub>9</sub>H<sub>15</sub>O<sub>2</sub>NF<sub>3</sub>: 226.1049; Found: 226.1046.

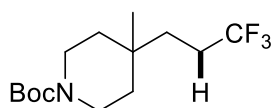

**tert-butyl 4-methyl-4-(3,3,3-trifluoropropyl)piperidine-1-carboxylate (3c)**

The product **3c** (47.3 mg, 80% yield) was purified with silica gel chromatography as colorless liquid, **4a-1** (11.7 mg, 54% yield) and **4a-2** (5.8 mg, 27% yield) were isolated



simultaneously, eluent: (PE:EA=20:1 to 10:1). **<sup>1</sup>H NMR** (400 MHz, CDCl<sub>3</sub>) δ 3.62 – 3.56 (m, 2H), 3.20 – 3.14 (m, 2H), 2.09 – 1.97 (m, 2H), 1.52 – 1.48 (m, 2H), 1.44 (s, 9H), 1.35 – 1.28 (m, 4H), 0.94 (s, 3H); **<sup>13</sup>C NMR** (101 MHz, CDCl<sub>3</sub>) δ 154.9, 127.5 (q, *J* = 277.3 Hz), 79.4, 39.6 (br), 36.3, 33.2 (q, *J* = 2.6 Hz), 30.5, 28.4, 28.2 (q, *J* = 28.7 Hz), 22.6; **<sup>19</sup>F NMR** (376 MHz, CDCl<sub>3</sub>) δ -66.52 (t, *J* = 10.5 Hz, 3F). **HRMS** (ESI) *m/z*: [M+H-C<sub>4</sub>H<sub>8</sub>]<sup>+</sup> Calcd for C<sub>10</sub>H<sub>17</sub>O<sub>2</sub>NF<sub>3</sub>: 240.1206; Found: 240.1203.

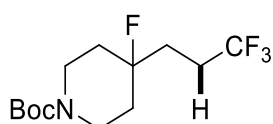

***tert*-butyl 4-fluoro-4-(3,3,3-trifluoropropyl)piperidine-1-carboxylate (3d)**

The product **3d** (38.3 mg, 64% yield) was purified with silica gel chromatography as colorless liquid, **4a-1** (12.3 mg, 57% yield) and **4a-2** (4.5 mg, 21% yield) were isolated simultaneously, eluent: (PE:EA=25:1 to 10:1). **<sup>1</sup>H NMR** (400 MHz, CDCl<sub>3</sub>) δ 3.95 (br, 2H), 3.05 (br, 2H), 2.29 – 2.16 (m, 2H), 1.88 – 1.74 (m, 4H), 1.62 – 1.48 (m, 2H), 1.44 (s, 9H); **<sup>13</sup>C NMR** (101 MHz, CDCl<sub>3</sub>) δ 154.6, 127.0 (q, *J* = 277.0 Hz), 92.3 (d, *J* = 174.4 Hz), 79.7, 39.3 (d, *J* = 72.7 Hz), 34.3 (d, *J* = 21.8 Hz), 32.4 (qd, *J* = 2.8, 22.5 Hz), 28.3, 27.6 (qd, *J* = 29.6, 4.8 Hz); **<sup>19</sup>F NMR** (376 MHz, CDCl<sub>3</sub>) δ -66.66 (t, *J* = 10.2 Hz, 3F), -165.95 (s, 1F). **HRMS** (ESI) *m/z*: [M+H-C<sub>4</sub>H<sub>8</sub>]<sup>+</sup> Calcd for C<sub>9</sub>H<sub>14</sub>O<sub>2</sub>NF<sub>4</sub>: 244.0955; Found: 244.0953.

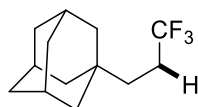

**(3*r*,5*r*,7*r*)-1-(3,3,3-trifluoropropyl)adamantane (3e)**

The product **3e** (43.2 mg, 93% yield) was purified with silica gel chromatography as colorless liquid, **4a-1** (12.8 mg, 59% yield) and **4a-2** (4.8 mg, 22% yield) were isolated simultaneously, eluent: (PE:EA=1:0 to 10:1). **<sup>1</sup>H NMR** (400 MHz, CDCl<sub>3</sub>) δ 2.08 – 2.00 (m, 2H), 1.99 – 1.96 (m, 3H), 1.72 (d, *J* = 12.0 Hz, 3H), 1.62 (d, *J* = 12.8 Hz, 3H), 1.47 (d, *J* = 3.2 Hz, 6H), 1.33 – 1.29 (m, 2H); **<sup>13</sup>C NMR** (101 MHz, CDCl<sub>3</sub>) δ 128.0 (q, *J* = 277.4 Hz), 41.9, 37.0, 35.5 (q, *J* = 2.5 Hz), 31.3, 28.5, 27.6 (q, *J* = 28.4 Hz); **<sup>19</sup>F NMR** (376 MHz, CDCl<sub>3</sub>) δ -66.49 (t, *J* = 10.9 Hz, 3F). **HRMS** (EI) *m/z*: [M]<sup>+</sup> Calcd for

C<sub>13</sub>H<sub>19</sub>F<sub>3</sub>: 232.1433; Found: 232.1432.

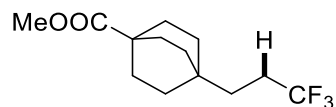

### methyl 4-(3,3,3-trifluoropropyl)bicyclo[2.2.2]octane-1-carboxylate (**3f**)

The product **3f** (46.5 mg, 88% yield) was purified with silica gel chromatography as colorless liquid, **4a-1** (13.0 mg, 60% yield) and **4a-2** (5.4 mg, 25% yield) were isolated simultaneously, eluent: (PE:EA=1:0 to 10:1). <sup>1</sup>H NMR (400 MHz, CDCl<sub>3</sub>) δ 3.63 (s, 3H), 2.02 – 1.90 (m, 2H), 1.79 – 1.75 (m, 6H), 1.41 – 1.34 (m, 8H); <sup>13</sup>C NMR (101 MHz, CDCl<sub>3</sub>) δ 178.1, 127.5 (q, *J* = 277.3 Hz), 51.6, 38.6, 32.4 (q, *J* = 2.6 Hz), 29.9, 29.6, 28.6 (q, *J* = 28.6 Hz), 28.2; <sup>19</sup>F NMR (376 MHz, CDCl<sub>3</sub>) δ -66.63 (t, *J* = 10.5 Hz, 3F). HRMS (ESI) *m/z*: [M+H]<sup>+</sup> Calcd for C<sub>13</sub>H<sub>20</sub>O<sub>2</sub>F<sub>3</sub>: 265.1410; Found: 265.1407.

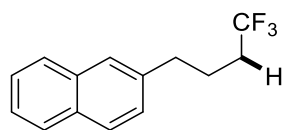

### 2-(4,4,4-trifluorobutyl)naphthalene (**3g**)

This compound is known.<sup>[7]</sup> The product **3g** (42.4 mg, 89% yield) was purified with silica gel chromatography as white solid, mp: 40 – 41 °C, **4a-1** (11.9 mg, 55% yield) and **4a-2** (5.6 mg, 26% yield) were isolated simultaneously, eluent: (PE:EA=1:0 to 10:1). <sup>1</sup>H NMR (400 MHz, CDCl<sub>3</sub>) δ 7.85 – 7.80 (m, 3H), 7.64 (s, 1H), 7.52 – 7.45 (m, 2H), 7.34 (dd, *J* = 8.4, 1.6 Hz, 1H), 2.88 (t, *J* = 7.6 Hz, 2H), 2.20 – 2.07 (m, 2H), 2.06 – 1.97 (m, 2H); <sup>13</sup>C NMR (101 MHz, CDCl<sub>3</sub>) δ 138.1, 133.5, 132.1, 128.2, 127.6, 127.4, 127.2 (q, *J* = 277.6 Hz), 126.9, 126.6, 126.1, 125.4, 34.7, 33.1 (q, *J* = 28.7 Hz), 23.4 (q, *J* = 2.9 Hz); <sup>19</sup>F NMR (376 MHz, CDCl<sub>3</sub>) δ -66.12 (t, *J* = 10.2 Hz, 3F).

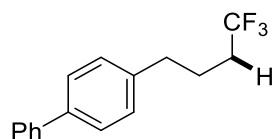

### 4-(4,4,4-trifluorobutyl)-1,1'-biphenyl (**3h**)

This compound is known.<sup>[7]</sup> The product **3h** (48.6 mg, 92% yield) was purified with

silica gel chromatography as white solid, mp: 62 – 63 °C, **4a-1** (11.9 mg, 55% yield) and **4a-2** (6.1 mg, 28% yield) were isolated simultaneously, eluent: (PE:EA=1:0 to 10:1). **<sup>1</sup>H NMR** (400 MHz, CDCl<sub>3</sub>) δ 7.63 – 7.60 (m, 2H), 7.59 – 7.56 (m, 2H), 7.49 – 7.45 (m, 2H), 7.39 – 7.35 (m, 1H), 7.30 – 7.27 (m, 2H), 2.76 (t, *J* = 7.6 Hz, 2H), 2.21 – 2.09 (m, 2H), 2.00 – 1.93 (m, 2H); **<sup>13</sup>C NMR** (101 MHz, CDCl<sub>3</sub>) δ 140.9, 139.7, 139.2, 128.8, 128.7, 127.3, 127.2 (q, *J* = 277.8 Hz), 127.1, 127.0, 34.2, 33.1 (q, *J* = 28.6 Hz), 23.5 (q, *J* = 2.9 Hz); **<sup>19</sup>F NMR** (376 MHz, CDCl<sub>3</sub>) δ -66.11 (t, *J* = 10.9 Hz, 3F).

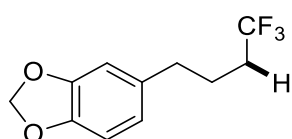

### 5-(4,4,4-trifluorobutyl)benzo[*d*][1,3]dioxole (**3i**)

The product **3i** (41.8 mg, 90% yield) was purified with silica gel chromatography as colorless liquid, **4a-1** (13.0 mg, 60% yield) and **4a-2** (5.8 mg, 27% yield) were isolated simultaneously, eluent: (PE:EA=1:0 to 10:1). **<sup>1</sup>H NMR** (400 MHz, CDCl<sub>3</sub>) δ 6.75 (d, *J* = 8.0 Hz, 1H), 6.67 (d, *J* = 1.6 Hz, 1H), 6.62 (dd, *J* = 8.0, 1.6 Hz, 1H), 5.94 (s, 2H), 2.61 (t, *J* = 7.4 Hz, 2H), 2.13 – 2.00 (m, 2H), 1.88 – 1.81 (m, 2H); **<sup>13</sup>C NMR** (101 MHz, CDCl<sub>3</sub>) δ 147.7, 145.9, 134.4, 127.2 (q, *J* = 277.6 Hz), 121.2, 108.7, 108.2, 100.8, 34.3, 32.9 (q, *J* = 28.6 Hz), 23.7 (q, *J* = 2.8 Hz); **<sup>19</sup>F NMR** (376 MHz, CDCl<sub>3</sub>) δ -66.17 (t, *J* = 10.7 Hz, 3F). **HRMS** (FI) *m/z*: [*M*]<sup>+</sup> Calcd for C<sub>11</sub>H<sub>11</sub>O<sub>2</sub>F<sub>3</sub>: 232.0706; Found: 232.0705.

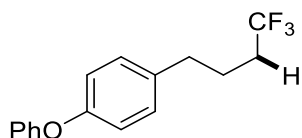

### 1-phenoxy-4-(4,4,4-trifluorobutyl)benzene (**3j**)

The product **4j** (50.4 mg, 90% yield) was purified with silica gel chromatography as colorless liquid, **4a-1** (12.5 mg, 58% yield) and **4a-2** (5.2 mg, 24% yield) were isolated simultaneously, eluent: (PE:EA=1:0 to 10:1). **<sup>1</sup>H NMR** (400 MHz, CDCl<sub>3</sub>) δ 7.35 (t, *J* = 7.6 Hz, 2H), 7.17 – 7.10 (m, 3H), 7.02 (d, *J* = 8.0 Hz, 2H), 6.98 (d, *J* = 8.0 Hz, 2H),

2.69 (t,  $J = 8.0$  Hz, 2H), 2.17 – 2.05 (m, 2H), 1.95 – 1.87 (m, 2H);  $^{13}\text{C}$  NMR (101 MHz,  $\text{CDCl}_3$ )  $\delta$  157.4, 155.5, 135.5, 129.7, 129.6, 127.1 (q,  $J = 277.5$  Hz), 123.0, 119.1, 118.6, 33.9, 33.0 (q,  $J = 28.7$  Hz), 23.6 (q,  $J = 2.9$  Hz);  $^{19}\text{F}$  NMR (376 MHz,  $\text{CDCl}_3$ )  $\delta$  -66.14 (t,  $J = 10.9$  Hz, 3F). HRMS (FI)  $m/z$ :  $[\text{M}]^+$  Calcd for  $\text{C}_{16}\text{H}_{15}\text{OF}_3$ : 280.1070; Found: 280.1074.

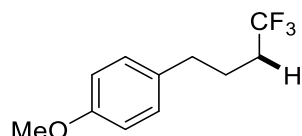

### 1-methoxy-4-(4,4,4-trifluorobutyl)benzene (**3k**)

This compound is known.<sup>[7]</sup> The product **3k** (39.7 mg, 91% yield) was purified with silica gel chromatography as colorless liquid, **4a-1** (12.3 mg, 57% yield) and **4a-2** (6.1 mg, 28% yield) were isolated simultaneously, eluent: (PE:EA=1:0 to 10:1).  $^1\text{H}$  NMR (400 MHz,  $\text{CDCl}_3$ )  $\delta$  7.10 (d,  $J = 8.4$  Hz, 2H), 6.86 (d,  $J = 8.4$  Hz, 2H), 3.81 (s, 3H), 2.64 (t,  $J = 8.0$  Hz, 2H), 2.14 – 2.02 (m, 2H), 1.91 – 1.83 (m, 2H);  $^{13}\text{C}$  NMR (101 MHz,  $\text{CDCl}_3$ )  $\delta$  157.9, 132.7, 129.3, 127.2 (q,  $J = 277.5$  Hz), 113.9, 55.2, 33.7, 33.0 (q,  $J = 28.7$  Hz), 23.7 (q,  $J = 2.9$  Hz);  $^{19}\text{F}$  NMR (376 MHz,  $\text{CDCl}_3$ )  $\delta$  -66.17 (t,  $J = 10.7$  Hz, 3F).

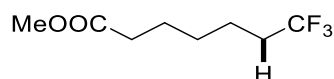

### methyl 7,7,7-trifluoroheptanoate (**3l**)

This compound is known.<sup>[8]</sup> The product **3l** (28.5 mg, 72% yield) was purified with silica gel chromatography as colorless liquid, **4a-1** (11.7 mg, 54% yield) and **4a-2** (4.5 mg, 21% yield) were isolated simultaneously, eluent: (PE:EA=30:1 to 10:1).  $^1\text{H}$  NMR (400 MHz,  $\text{CDCl}_3$ )  $\delta$  3.67 (s, 3H), 2.33 (t,  $J = 7.6$  Hz, 2H), 2.11 – 2.04 (m, 2H), 1.69 – 1.61 (m, 2H), 1.59 – 1.53 (m, 2H), 1.44 – 1.38 (m, 2H);  $^{13}\text{C}$  NMR (101 MHz,  $\text{CDCl}_3$ )  $\delta$  173.8, 127.1 (q,  $J = 277.5$  Hz), 51.5, 33.6, 33.5 (q,  $J = 28.5$  Hz), 28.1, 24.4, 21.6 (q,  $J = 3.0$  Hz);  $^{19}\text{F}$  NMR (376 MHz,  $\text{CDCl}_3$ )  $\delta$  -66.45 (t,  $J = 10.9$  Hz, 3F).

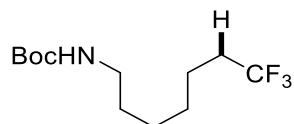

**tert-butyl (7,7,7-trifluoroheptyl)carbamate (3m)**

The product **3m** (47.3 mg, 88% yield) was purified with silica gel chromatography as colorless liquid, **4a-1** (13.0 mg, 60% yield) and **4a-2** (5.2 mg, 24% yield) were isolated simultaneously, eluent: (PE:EA=15:1 to 10:1). **<sup>1</sup>H NMR** (400 MHz, CDCl<sub>3</sub>) δ 4.53 (br, 1H), 3.09 (t, *J* = 7.0 Hz, 2H), 2.10 – 1.98 (m, 2H), 1.56 – 1.52 (m, 2H), 1.47 (t, *J* = 7.0 Hz, 2H), 1.43 (s, 9H), 1.37 – 1.31 (m, 4H); **<sup>13</sup>C NMR** (101 MHz, CDCl<sub>3</sub>) δ 156.0, 127.2 (q, *J* = 277.5 Hz), 79.1, 40.4 (br), 33.6 (q, *J* = 28.5 Hz), 29.8, 28.3, 28.2, 26.3, 21.7 (q, *J* = 2.9 Hz); **<sup>19</sup>F NMR** (376 MHz, CDCl<sub>3</sub>) δ -66.46 (t, *J* = 10.9 Hz, 3F). **HRMS** (ESI) *m/z*: [M+H-C<sub>4</sub>H<sub>8</sub>]<sup>+</sup> Calcd for C<sub>8</sub>H<sub>15</sub>O<sub>2</sub>NF<sub>3</sub>: 214.1049; Found: 214.1047.

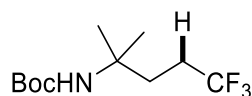

**tert-butyl (5,5,5-trifluoro-2-methylpentan-2-yl)carbamate (3n)**

The product **3n** (46.0 mg, 90% yield) was purified with silica gel chromatography as colorless liquid, **4a-1** (11.7 mg, 54% yield) and **4a-2** (5.8 mg, 27% yield) were isolated simultaneously, eluent: (PE:EA=20:1 to 10:1). **<sup>1</sup>H NMR** (400 MHz, CDCl<sub>3</sub>) δ 4.38 (s, 1H), 2.11 – 2.00 (m, 2H), 1.97 – 1.90 (m, 2H), 1.42 (s, 9H), 1.25 (s, 6H); **<sup>13</sup>C NMR** (101 MHz, CDCl<sub>3</sub>) δ 154.2, 127.4 (q, *J* = 277.3 Hz), 79.1 (br), 51.3, 31.6, 29.2 (q, *J* = 28.9 Hz), 28.3, 27.3 (br); **<sup>19</sup>F NMR** (376 MHz, CDCl<sub>3</sub>) δ -66.27 (t, *J* = 10.5 Hz, 3F). **HRMS** (ESI) *m/z*: [M+H-C<sub>4</sub>H<sub>8</sub>]<sup>+</sup> Calcd for C<sub>7</sub>H<sub>13</sub>O<sub>2</sub>NF<sub>3</sub>: 200.0893; Found: 200.0892.

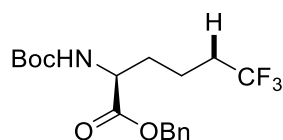

**benzyl (S)-2-((tert-butoxycarbonyl)amino)-6,6,6-trifluorohexanoate (3o)**

The product **3o** (63.8 mg, 85% yield) was purified with silica gel chromatography as colorless liquid, **4a-1** (11.9 mg, 55% yield) and **4a-2** (5.4 mg, 25% yield) were isolated simultaneously, eluent: (PE:EA=15:1 to 10:1). **<sup>1</sup>H NMR** (400 MHz, CDCl<sub>3</sub>) δ 7.37 –

7.33 (m, 5H), 5.23 – 5.12 (m, 2H), 5.10 (d,  $J = 8.0$  Hz, 1H), 4.39 – 4.34 (m, 1H), 2.15 – 1.98 (m, 2H), 1.94 – 1.84 (m, 1H), 1.74 – 1.55 (m, 3H), 1.44 (s, 9H);  $^{13}\text{C}$  NMR (101 MHz,  $\text{CDCl}_3$ )  $\delta$  172.2, 155.3, 135.1, 128.6, 128.5, 128.3, 126.8 (q,  $J = 277.5$  Hz), 80.1, 67.2, 52.9, 33.1 (q,  $J = 28.9$  Hz), 31.7, 28.2, 17.8;  $^{19}\text{F}$  NMR (376 MHz,  $\text{CDCl}_3$ )  $\delta$  -66.35 (t,  $J = 10.5$  Hz, 3F). HRMS (ESI)  $m/z$ :  $[\text{M}+\text{H}-\text{C}_4\text{H}_8]^+$  Calcd for  $\text{C}_{14}\text{H}_{17}\text{O}_4\text{NF}_3$ : 320.1104; Found: 320.1097.

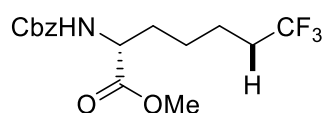

**methyl (*R*)-2-(((benzyloxy)carbonyl)amino)-7,7,7-trifluoroheptanoate (**3p**)**

The product **3p** (59.7 mg, 86% yield) was purified with silica gel chromatography as colorless liquid, **4a-1** (10.8 mg, 50% yield) and **4a-2** (4.8 mg, 22% yield) were isolated simultaneously, eluent: (PE:EA=20:1 to 10:1).  $^1\text{H}$  NMR (400 MHz,  $\text{CDCl}_3$ )  $\delta$  7.36 – 7.31 (m, 5H), 5.38 (d,  $J = 8.0$  Hz, 1H), 5.11 (s, 2H), 4.42 – 4.37 (m, 1H), 3.74 (s, 3H), 2.11 – 1.99 (m, 2H), 1.91 – 1.82 (m, 1H), 1.72 – 1.63 (m, 1H), 1.61 – 1.51 (m, 2H), 1.45 – 1.33 (m, 2H);  $^{13}\text{C}$  NMR (101 MHz,  $\text{CDCl}_3$ )  $\delta$  172.7, 155.8, 136.1, 128.4, 128.1, 128.0, 126.9 (q,  $J = 277.6$  Hz), 66.9, 53.5, 52.3, 33.3 (q,  $J = 28.7$  Hz), 32.2, 24.2, 21.4 (q,  $J = 3.0$  Hz);  $^{19}\text{F}$  NMR (376 MHz,  $\text{CDCl}_3$ )  $\delta$  -66.39 (t,  $J = 10.9$  Hz, 3F). HRMS (ESI)  $m/z$ :  $[\text{M}+\text{H}]^+$  Calcd for  $\text{C}_{16}\text{H}_{21}\text{O}_4\text{NF}_3$ : 348.1417; Found: 348.1412.

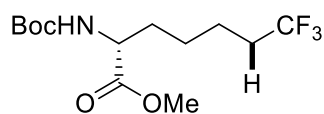

**methyl (*S*)-2-((*tert*-butoxycarbonyl)amino)-7,7,7-trifluoroheptanoate (**3q**)**

The product **3q** (53.3 mg, 85% yield) was purified with silica gel chromatography as colorless liquid, **4a-1** (11.9 mg, 55% yield) and **4a-2** (4.3 mg, 20% yield) were isolated simultaneously, eluent: (PE:EA=15:1 to 10:1).  $^1\text{H}$  NMR (400 MHz,  $\text{CDCl}_3$ )  $\delta$  5.04 (d,  $J = 8.4$  Hz, 1H), 4.29 (q,  $J = 6.9$  Hz, 1H), 3.72 (s, 3H), 2.11 – 1.99 (m, 2H), 1.84 – 1.78 (m, 1H), 1.65 – 1.51 (m, 3H), 1.42 (s, 11H);  $^{13}\text{C}$  NMR (101 MHz,  $\text{CDCl}_3$ )  $\delta$  173.1, 155.3, 127.0 (q,  $J = 277.6$  Hz), 79.8, 53.0, 52.2, 33.4 (q,  $J = 28.6$  Hz), 32.3, 28.2, 24.4, 21.4 (q,  $J = 2.9$  Hz);  $^{19}\text{F}$  NMR (376 MHz,  $\text{CDCl}_3$ )  $\delta$  -66.36 (t,  $J = 10.9$  Hz, 3F). HRMS

(ESI)  $m/z$ :  $[M+H-C_4H_8]^+$  Calcd for  $C_9H_{15}O_4NF_3$ : 258.0948; Found: 258.0943.

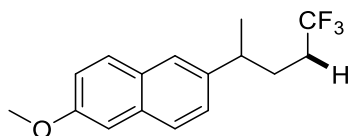

### 2-methoxy-6-(5,5,5-trifluoropentan-2-yl)naphthalene (**3r**)

The product **3r** (49.1 mg, 87% yield) was purified with silica gel chromatography as white solid, mp: 64 – 65 °C, **4a-1** (12.3 mg, 57% yield) and **4a-2** (5.0 mg, 23% yield) were isolated simultaneously, eluent: (PE:EA=1:0 to 10:1).  $^1H$  NMR (400 MHz,  $CDCl_3$ )  $\delta$  7.72 (t,  $J$  = 8.4 Hz, 2H), 7.54 (s, 1H), 7.31 (dd,  $J$  = 8.4, 2.0 Hz, 1H), 7.18 – 7.14 (m, 2H), 3.93 (s, 3H), 2.92 – 2.84 (m, 1H), 2.07 – 1.89 (m, 4H), 1.37 (d,  $J$  = 6.8 Hz, 3H);  $^{13}C$  NMR (101 MHz,  $CDCl_3$ )  $\delta$  157.4, 140.6, 133.4, 129.0, 128.9, 127.3 (q,  $J$  = 277.5 Hz), 127.2, 125.6, 125.2, 118.9, 105.5, 55.3, 39.0, 32.1 (q,  $J$  = 28.6 Hz), 30.0 (q,  $J$  = 2.7 Hz), 22.4;  $^{19}F$  NMR (376 MHz,  $CDCl_3$ )  $\delta$  -66.25 (t,  $J$  = 9.8 Hz, 3F). HRMS (EI)  $m/z$ :  $[M]^+$  Calcd for  $C_{16}H_{17}OF_3$ : 282.1226; Found: 282.1230.

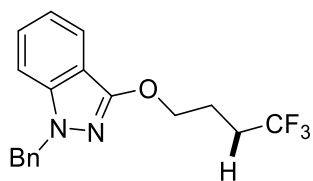

### 1-benzyl-3-(4,4,4-trifluorobutoxy)-1H-indazole (**3s**)

The product **3s** (61.5 mg, 92% yield) was purified with silica gel chromatography as colorless liquid, **4a-1** (11.9 mg, 55% yield) and **4a-2** (5.8 mg, 27% yield) were isolated simultaneously, eluent: (PE:EA=20:1 to 10:1).  $^1H$  NMR (400 MHz,  $CDCl_3$ )  $\delta$  7.66 (d,  $J$  = 8.0 Hz, 1H), 7.33 – 7.21 (m, 4H), 7.17 (t,  $J$  = 5.2 Hz, 3H), 7.05 (t,  $J$  = 7.2 Hz, 1H), 5.38 (s, 2H), 4.44 (t,  $J$  = 6.0 Hz, 2H), 2.40 – 2.28 (m, 2H), 2.16 – 2.09 (m, 2H);  $^{13}C$  NMR (101 MHz,  $CDCl_3$ )  $\delta$  155.6, 141.5, 137.3, 128.6, 127.5, 126.9, 127.1 (q,  $J$  = 277.1 Hz), 119.9, 119.8, 119.2, 112.8, 108.9, 67.1, 52.33, 52.27, 52.22, 30.8 (q,  $J$  = 29.3 Hz), 22.1;  $^{19}F$  NMR (376 MHz,  $CDCl_3$ )  $\delta$  -66.38 (t,  $J$  = 10.9 Hz, 3F). HRMS (ESI):  $m/z$ :  $[M+H]^+$  Calcd for  $C_{18}H_{18}ON_2F_3$ : 335.1366; Found: 335.1357.

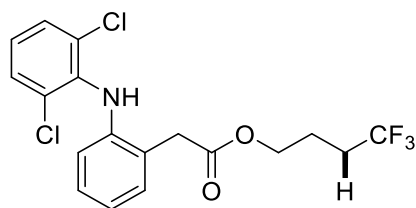

### 4,4,4-trifluorobutyl 2-((2,6-dichlorophenyl)amino)phenylacetate (**3t**)

The product **3t** (73.1 mg, 90% yield) was purified with silica gel chromatography as colorless liquid, **4a-1** (11.9 mg, 55% yield) and **4a-2** (4.8 mg, 22% yield) were isolated simultaneously, eluent: (PE:EA=20:1 to 10:1).  $^1\text{H NMR}$  (400 MHz,  $\text{CDCl}_3$ )  $\delta$  7.35 (d,  $J = 8.4$  Hz, 2H), 7.23 (d,  $J = 7.2$  Hz, 1H), 7.14 (t,  $J = 9.2$  Hz, 1H), 7.01 – 6.95 (m, 2H), 6.86 (br, 1H), 6.56 (d,  $J = 6.4$  Hz, 1H), 4.21 (t,  $J = 6.4$  Hz, 2H), 3.83 (s, 2H), 2.21 – 2.09 (m, 2H), 1.97 – 1.90 (m, 2H);  $^{13}\text{C NMR}$  (101 MHz,  $\text{CDCl}_3$ )  $\delta$  172.2, 142.6, 137.7, 130.8, 129.4, 128.9, 128.1, 126.8 (q,  $J = 277.6$  Hz), 124.1, 122.1, 118.3, 63.5, 38.4, 30.5 (q,  $J = 29.6$  Hz), 21.5;  $^{19}\text{F NMR}$  (376 MHz,  $\text{CDCl}_3$ )  $\delta$  -66.45 (t,  $J = 9.6$  Hz, 3F). **HRMS** (ESI):  $m/z$ :  $[\text{M}+\text{H}]^+$  Calcd for  $\text{C}_{18}\text{H}_{17}\text{O}_2\text{NCl}_2\text{F}_3$ : 406.0583; Found: 406.0576.

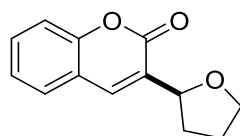

### 3-(tetrahydrofuran-2-yl)-2H-chromen-2-one (**4a-1**)

This compound is known.<sup>[9]</sup> The product **4a-1** was purified with silica gel chromatography as white solid, mp: 42 – 43 °C, eluent: (PE:EA=10:1).  $^1\text{H NMR}$  (400 MHz,  $\text{CDCl}_3$ )  $\delta$  7.79 (s, 1H), 7.47 (t,  $J = 7.6$  Hz, 2H), 7.30 (d,  $J = 8.4$  Hz, 1H), 7.27 – 7.23 (m, 1H), 4.94 (t,  $J = 6.8$  Hz, 1H), 4.12 – 4.07 (m, 1H), 3.93 (q,  $J = 7.3$  Hz, 1H), 2.54 – 2.46 (m, 1H), 2.05 – 1.97 (m, 1H), 1.97 – 1.87 (m, 1H), 1.79 – 1.71 (m, 1H);  $^{13}\text{C NMR}$  (101 MHz,  $\text{CDCl}_3$ )  $\delta$  160.5, 153.1, 136.4, 131.0, 130.9, 127.8, 124.4, 119.2, 116.4, 75.9, 68.9, 32.2, 25.6.

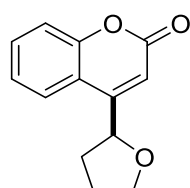



#### 4-(tetrahydrofuran-2-yl)-2*H*-chromen-2-one (**4a-2**)

This compound is known.<sup>[9]</sup> The product **4a-2** was purified with silica gel chromatography as colorless liquid, eluent: (PE:EA=10:1). <sup>1</sup>H NMR (400 MHz, CDCl<sub>3</sub>) δ 7.55 – 7.51 (m, 2H), 7.38 – 7.35 (m, 1H), 7.30 – 7.26 (m, 1H), 6.59 (d, *J* = 1.2 Hz, 1H), 5.26 – 5.22 (m, 1H), 4.17 – 4.12 (m, 1H), 4.03 – 3.97 (m, 1H), 2.58 – 2.50 (m, 1H), 2.12 – 1.95 (m, 2H), 1.92 – 1.84 (m, 1H); <sup>13</sup>C NMR (101 MHz, CDCl<sub>3</sub>) δ 161.2, 156.9, 153.9, 131.5, 124.1, 124.0, 117.6, 117.4, 110.9, 75.7, 69.2, 32.9, 25.7.

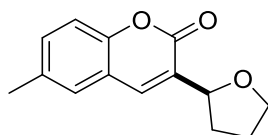

#### 6-methyl-3-(tetrahydrofuran-2-yl)-2*H*-chromen-2-one (**4b-1**)

This compound is known.<sup>[10]</sup> The product **4b-1** (13.8 mg, 60% yield) was purified with silica gel chromatography as white solid, mp: 65 – 66 °C, **3b** (45.0 mg, 80% yield) and **4b-2** (4.0 mg, 17% yield) were isolated simultaneously, eluent: (PE:EA=20:1 to 10:1). <sup>1</sup>H NMR (400 MHz, CDCl<sub>3</sub>) δ 7.74 (s, 1H), 7.30 – 7.26 (m, 2H), 7.21 (d, *J* = 8.4 Hz, 1H), 4.96 (t, *J* = 6.8 Hz, 1H), 4.13 – 4.08 (m, 1H), 3.95 (q, *J* = 7.5 Hz, 1H), 2.55 – 2.47 (m, 1H), 2.39 (s, 3H), 2.06 – 1.98 (m, 1H), 1.94 – 1.89 (m, 1H), 1.80 – 1.71 (m, 1H); <sup>13</sup>C NMR (101 MHz, CDCl<sub>3</sub>) δ 160.7, 151.2, 136.4, 134.0, 131.9, 130.8, 127.6, 118.9, 116.1, 75.9, 68.9, 32.2, 25.6, 20.8.

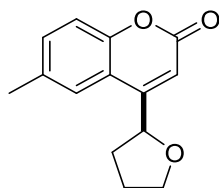

#### 6-methyl-4-(tetrahydrofuran-2-yl)-2*H*-chromen-2-one (**4b-2**)

The product **4b-2** (4.0 mg, 17% yield) was purified with silica gel chromatography as colorless liquid, **3b** (45.0 mg, 80% yield) and **4b-1** (13.8 mg, 60% yield) were isolated simultaneously, eluent: (PE:EA=20:1 to 10:1). <sup>1</sup>H NMR (400 MHz, CDCl<sub>3</sub>) δ 7.35 (d, *J* = 8.4 Hz, 1H), 7.29 (d, *J* = 9.2 Hz, 2H), 6.59 (s, 1H), 5.25 (t, *J* = 8.0 Hz, 1H), 4.13 (q, *J* = 6.9 Hz, 1H), 4.02 (q, *J* = 7.5 Hz, 1H), 2.62 – 2.53 (m, 1H), 2.44 (s, 3H), 2.12 – 1.98

(m, 2H), 1.93 – 1.85 (m, 1H);  $^{13}\text{C}$  NMR (101 MHz,  $\text{CDCl}_3$ )  $\delta$  161.4, 156.8, 152.0, 133.7, 132.5, 123.8, 117.2, 117.1, 110.7, 75.7, 69.1, 32.9, 25.7, 21.1. HRMS (ESI)  $m/z$ :  $[\text{M}+\text{H}]^+$  Calcd for  $\text{C}_{14}\text{H}_{15}\text{O}_3$ : 231.1016; Found: 231.1019.

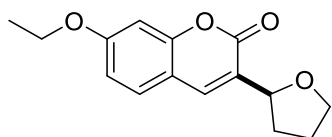

**7-ethoxy-3-(tetrahydrofuran-2-yl)-2H-chromen-2-one (4c-1)**

This compound is known.<sup>[11]</sup> The product **4c-1** (13.5 mg, 52% yield) was purified with silica gel chromatography as white solid, mp: 67 – 68 °C, **3b** (48.9 mg, 87% yield) was isolated simultaneously, eluent: (PE:EA=20:1 to 10:1).  $^1\text{H}$  NMR (400 MHz,  $\text{CDCl}_3$ )  $\delta$  7.72 (s, 1H), 7.36 (d,  $J$  = 8.8 Hz, 1H), 6.83 – 6.79 (m, 2H), 4.92 (t,  $J$  = 7.2 Hz, 1H), 4.07 (q,  $J$  = 7.1 Hz, 3H), 3.93 (q,  $J$  = 7.5 Hz, 1H), 2.52 – 2.44 (m, 1H), 2.05 – 1.97 (m, 1H), 1.96 – 1.87 (m, 1H), 1.79 – 1.71 (m, 1H), 1.44 (t,  $J$  = 7.0 Hz, 3H);  $^{13}\text{C}$  NMR (101 MHz,  $\text{CDCl}_3$ )  $\delta$  161.5, 160.9, 154.8, 136.6, 128.6, 127.2, 112.9, 112.7, 100.9, 75.9, 68.8, 64.1, 32.2, 25.6, 14.5.

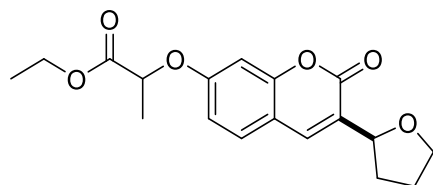

**ethyl 2-((2-oxo-3-(tetrahydrofuran-2-yl)-2H-chromen-7-yl)oxy)propanoate (4d-1)**

The product **4d-1** (16.6 mg, 50% yield) was purified with silica gel chromatography as colorless liquid, **3b** (50.6 mg, 90% yield) was isolated simultaneously, eluent: (PE:EA=20:1 to 10:1). Mixture of diastereomers: (dr=1:1.1)  $^1\text{H}$  NMR (400 MHz,  $\text{CDCl}_3$ )  $\delta$  7.73 (s, 1H, minor), 7.72 (s, 1H, major), 7.39 (d,  $J$  = 8.4 Hz, 1H, minor and major), 6.87 – 6.85 (m, 1H, major), 6.84 – 6.83 (m, 1H, minor), 6.74 (d,  $J$  = 2.4 Hz, 1H, minor), 6.73 (d,  $J$  = 2.4 Hz, 1H, major), 4.92 (t,  $J$  = 7.0 Hz, 1H, minor and major), 4.78 (q,  $J$  = 6.8 Hz, 1H, minor and major), 4.23 (q,  $J$  = 7.1 Hz, 2H, minor and major), 4.12 – 4.06 (m, 1H, minor and major), 3.93 (q,  $J$  = 7.3 Hz, 1H, minor and major), 2.53 – 2.44 (m, 1H, minor and major), 2.03 – 1.97 (m, 1H, minor and major), 1.95 – 1.89 (m, 1H,

minor and major), 1.79 – 1.71 (m, 1H, minor and major), 1.65 (d,  $J = 6.8$  Hz, 3H, minor and major), 1.27 (t,  $J = 7.2$  Hz, 3H, minor), 1.26 (t,  $J = 7.2$  Hz, 3H, major); For the mixture:  $^{13}\text{C}$  NMR (101 MHz,  $\text{CDCl}_3$ )  $\delta$  171.3 (major), 171.2 (minor), 160.7 (minor and major), 159.9 (minor and major), 154.5 (minor and major), 136.5 (minor), 136.4 (major), 128.8 (minor and major), 127.9 (major), 127.8 (minor), 113.5 (major), 113.4 (minor), 113.2 (minor), 113.0 (major), 101.6 (minor), 101.5 (major), 75.9 (major), 75.8 (minor), 72.7 (major), 72.6 (minor), 68.9 (minor), 68.8 (major), 61.6 (minor and major), 32.3 (major), 32.2 (minor), 25.6 (major), 25.5 (minor), 18.4 (minor and major), 14.1 (minor and major). **HRMS** (ESI)  $m/z$ :  $[\text{M}+\text{H}]^+$  Calcd for  $\text{C}_{18}\text{H}_{21}\text{O}_6$ : 333.1333; Found: 333.1332.

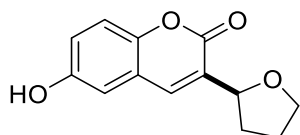

#### 6-hydroxy-3-(tetrahydrofuran-2-yl)-2H-chromen-2-one (**4e-1**)

The product **4e-1** (9.3 mg, 40% yield) was purified with silica gel chromatography as white solid, mp: 134 – 135 °C, **3b** (49.5 mg, 88% yield) was isolated simultaneously, eluent: (PE:EA=20:1 to 3:1).  $^1\text{H}$  NMR (400 MHz,  $\text{CDCl}_3$ )  $\delta$  7.72 (s, 1H), 7.18 (d,  $J = 8.8$  Hz, 1H), 7.02 (dd,  $J = 8.8, 2.8$  Hz, 1H), 6.93 (d,  $J = 2.8$  Hz, 1H), 6.69 (br, 1H), 4.98 (t,  $J = 6.8$  Hz, 1H), 4.12 (q,  $J = 8.0$  Hz, 1H), 3.96 (q,  $J = 7.2$  Hz, 1H), 2.56 – 2.47 (m, 1H), 2.07 – 1.91 (m, 2H), 1.82 – 1.74 (m, 1H);  $^{13}\text{C}$  NMR (101 MHz,  $\text{CDCl}_3$ )  $\delta$  161.2, 152.2, 147.2, 136.2, 131.0, 119.7, 119.4, 117.4, 112.5, 76.0, 69.0, 32.2, 25.6. **HRMS** (ESI)  $m/z$ :  $[\text{M}+\text{H}]^+$  Calcd for  $\text{C}_{13}\text{H}_{13}\text{O}_4$ : 233.0808; Found: 233.0807.

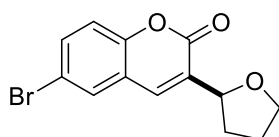

#### 6-bromo-3-(tetrahydrofuran-2-yl)-2H-chromen-2-one (**4f-1**)

This compound is known.<sup>[10]</sup> The product **4f-1** (13.0 mg, 44% yield) was purified with silica gel chromatography as white solid, mp: 125 – 126 °C, **3b** (47.8 mg, 85% yield) was isolated simultaneously, eluent: (PE:EA=20:1 to 10:1).  $^1\text{H}$  NMR (400 MHz,  $\text{CDCl}_3$ )

$\delta$  7.71 (s, 1H), 7.61 (s, 1H), 7.55 (dd,  $J$  = 8.8, 2.0 Hz, 1H), 7.19 (d,  $J$  = 8.8 Hz, 1H), 4.93 (t,  $J$  = 7.2 Hz, 1H), 4.08 (q,  $J$  = 7.1 Hz, 1H), 3.94 (q,  $J$  = 7.5 Hz, 1H), 2.55 – 2.46 (m, 1H), 2.06 – 1.96 (m, 1H), 1.94 – 1.86 (m, 1H), 1.78 – 1.69 (m, 1H);  $^{13}\text{C}$  NMR (101 MHz,  $\text{CDCl}_3$ )  $\delta$  159.8, 151.8, 135.0, 133.6, 132.3, 130.0, 120.7, 118.1, 116.9, 75.8, 68.9, 32.1, 25.6.

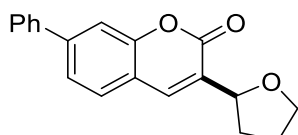

#### 7-phenyl-3-(tetrahydrofuran-2-yl)-2H-chromen-2-one (**4g-1**)

The product **4g-1** (16.1 mg, 55% yield) was purified with silica gel chromatography as white solid, mp: 109 – 110 °C, **3b** (46.1 mg, 82% yield) was isolated simultaneously, eluent: (PE:EA=20:1 to 10:1).  $^1\text{H}$  NMR (400 MHz,  $\text{CDCl}_3$ )  $\delta$  7.83 (s, 1H), 7.62 (d,  $J$  = 8.0 Hz, 2H), 7.54 (t,  $J$  = 7.8 Hz, 3H), 7.48 (t,  $J$  = 7.8 Hz, 2H), 7.40 (t,  $J$  = 7.2 Hz, 1H), 4.98 (t,  $J$  = 6.8 Hz, 1H), 4.13 (q,  $J$  = 7.1 Hz, 1H), 3.96 (q,  $J$  = 7.5 Hz, 1H), 2.58 – 2.49 (m, 1H), 2.08 – 2.00 (m, 1H), 1.98 – 1.90 (m, 1H), 1.83 – 1.74 (m, 1H);  $^{13}\text{C}$  NMR (101 MHz,  $\text{CDCl}_3$ )  $\delta$  160.5, 153.4, 144.0, 139.2, 136.1 (d,  $J$  = 7.6 Hz), 130.7, 129.0, 128.3, 128.0, 127.1, 123.3, 118.1, 114.5 (d,  $J$  = 9.6 Hz), 75.9 (d,  $J$  = 13.7 Hz), 68.8, 32.2, 25.6. HRMS (ESI)  $m/z$ :  $[\text{M}+\text{H}]^+$  Calcd for  $\text{C}_{19}\text{H}_{17}\text{O}_3$ : 293.1172; Found: 293.1168.

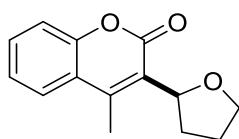

#### 4-methyl-3-(tetrahydrofuran-2-yl)-2H-chromen-2-one (**4h**)

The product **4h** (13.8 mg, 60% yield) was purified with silica gel chromatography as colorless liquid, **3b** (49.5 mg, 88% yield) was isolated simultaneously, eluent: (PE:EA=20:1 to 10:1).  $^1\text{H}$  NMR (400 MHz,  $\text{CDCl}_3$ )  $\delta$  7.67 (dd,  $J$  = 8.0, 0.8 Hz, 1H), 7.51 – 7.47 (m, 1H), 7.31 – 7.30 (m, 1H), 7.29 – 7.28 (m, 1H), 5.27 (t,  $J$  = 8.0 Hz, 1H), 4.17 (q,  $J$  = 7.5 Hz, 1H), 3.93 – 3.88 (m, 1H), 2.55 (s, 3H), 2.30 – 2.23 (m, 1H), 2.21 – 2.15 (m, 1H), 2.11 – 2.02 (m, 2H);  $^{13}\text{C}$  NMR (101 MHz,  $\text{CDCl}_3$ )  $\delta$  160.3, 152.3, 148.3, 131.1, 125.3, 124.6, 124.1, 120.8, 116.7, 75.9, 68.7, 40.0, 26.8, 14.5. HRMS (ESI)  $m/z$ :

[M+H]<sup>+</sup> Calcd for C<sub>14</sub>H<sub>15</sub>O<sub>3</sub>: 231.1016; Found: 231.1017.

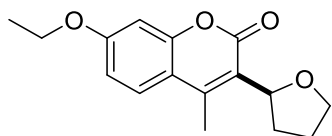

**7-ethoxy-4-methyl-3-(tetrahydrofuran-2-yl)-2H-chromen-2-one (4i)**

The product **4i** (16.7 mg, 61% yield) was purified with silica gel chromatography as white solid, mp: 76 – 78 °C, **3b** (51.2 mg, 91% yield) was isolated simultaneously, eluent: (PE:EA=20:1 to 10:1). <sup>1</sup>H NMR (400 MHz, CDCl<sub>3</sub>) δ 7.52 (d, *J* = 8.8 Hz, 1H), 6.81 (dd, *J* = 8.8, 2.4 Hz, 1H), 6.74 (d, *J* = 2.8 Hz, 1H), 5.22 (t, *J* = 7.8 Hz, 1H), 4.14 (q, *J* = 7.2 Hz, 1H), 4.05 (q, *J* = 6.9 Hz, 2H), 3.89 – 3.84 (m, 1H), 2.48 (s, 3H), 2.24 – 2.13 (m, 2H), 2.09 – 1.99 (m, 2H), 1.43 (t, *J* = 7.0 Hz, 3H); <sup>13</sup>C NMR (101 MHz, CDCl<sub>3</sub>) δ 161.4, 160.6, 154.0, 148.8, 125.6, 121.7, 114.1, 112.5, 100.7, 75.8, 68.6, 63.9, 30.7, 26.8, 14.5, 14.4. HRMS (ESI) m/z: [M+H]<sup>+</sup> Calcd for C<sub>16</sub>H<sub>19</sub>O<sub>4</sub>: 275.1278; Found: 275.1279.

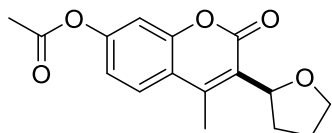

**4-methyl-2-oxo-3-(tetrahydrofuran-2-yl)-2H-chromen-7-yl acetate (4j)**

The product **4j** (15.9 mg, 55% yield) was purified with silica gel chromatography as white solid, mp: 97 – 98 °C, **3b** (50.6 mg, 90% yield) was isolated simultaneously, eluent: (PE:EA=20:1 to 10:1). <sup>1</sup>H NMR (400 MHz, CDCl<sub>3</sub>) δ 7.66 (d, *J* = 8.8 Hz, 1H), 7.08 – 7.04 (m, 2H), 5.25 (t, *J* = 7.8 Hz, 1H), 4.16 (q, *J* = 7.5 Hz, 1H), 3.92 – 3.87 (m, 1H), 2.53 (s, 3H), 2.33 (s, 3H), 2.30 – 2.24 (m, 1H), 2.23 – 2.17 (m, 1H), 2.09 – 2.01 (m, 2H); <sup>13</sup>C NMR (101 MHz, CDCl<sub>3</sub>) δ 168.8, 160.0, 152.9, 152.5, 147.9, 125.5, 124.8, 118.6, 117.9, 109.9, 75.9, 68.7, 31.0, 26.8, 21.1, 14.6. HRMS (ESI) m/z: [M+H]<sup>+</sup> Calcd for C<sub>16</sub>H<sub>17</sub>O<sub>5</sub>: 289.1071; Found: 289.1069.

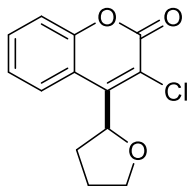

### 3-chloro-4-(tetrahydrofuran-2-yl)-2H-chromen-2-one (4k)

The product **4k** (15.3 mg, 61% yield) was purified with silica gel chromatography as white solid, mp: 112 – 113 °C, **3b** (37.7 mg, 67% yield) was isolated simultaneously, eluent: (PE:EA=20:1 to 15:1). **<sup>1</sup>H NMR** (400 MHz, CDCl<sub>3</sub>) δ 8.15 (d, *J* = 8.4 Hz, 1H), 7.52 (t, *J* = 7.8, 1H), 7.35 (d, *J* = 8.4 Hz, 1H), 7.28 (t, *J* = 7.2 Hz, 1H), 5.47 (t, *J* = 8.4 Hz, 1H), 4.31 (q, *J* = 7.6 Hz, 1H), 4.04 – 3.98 (m, 1H), 2.51 – 2.43 (m, 1H), 2.27 – 2.14 (m, 2H), 2.05 – 1.94 (m, 1H); **<sup>13</sup>C NMR** (101 MHz, CDCl<sub>3</sub>) δ 156.8, 151.8, 149.5, 131.5, 126.1, 124.4, 120.2, 117.3, 117.2, 78.8, 68.9, 31.2, 26.1. **HRMS** (ESI) *m/z*: [M+H]<sup>+</sup> Calcd for C<sub>13</sub>H<sub>12</sub>O<sub>3</sub>Cl: 251.0469; Found: 251.0471.

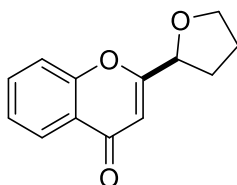

### 2-(tetrahydrofuran-2-yl)-4H-chromen-4-one (4l-1)

The product **4l-1** (11.5 mg, 53% yield) was purified with silica gel chromatography as colorless liquid, **3b** (50.6 mg, 90% yield) was isolated simultaneously, eluent: (PE:EA=20:1 to 15:1). **<sup>1</sup>H NMR** (400 MHz, CDCl<sub>3</sub>) δ 8.16 (dd, *J* = 8.0, 1.2 Hz, 1H), 7.65 – 7.61 (m, 1H), 7.41 (d, *J* = 8.4 Hz, 1H), 7.36 (t, *J* = 7.6 Hz, 1H), 6.42 (s, 1H), 4.81 (t, *J* = 6.6 Hz, 1H), 4.09 – 4.04 (m, 1H), 3.98 – 3.92 (m, 1H), 2.41 – 2.32 (m, 1H), 2.14 – 2.06 (m, 1H), 2.03 – 1.96 (m, 2H); **<sup>13</sup>C NMR** (101 MHz, CDCl<sub>3</sub>) δ 178.3, 169.4, 156.2, 133.6, 125.7, 125.0, 123.9, 117.9, 107.6, 76.7, 69.4, 31.1, 25.3. **HRMS** (ESI) *m/z*: [M+H]<sup>+</sup> Calcd for C<sub>13</sub>H<sub>13</sub>O<sub>3</sub>: 217.0859; Found: 217.0860.

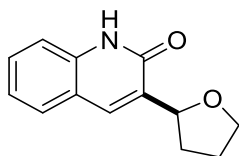

### 3-(tetrahydrofuran-2-yl)quinolin-2(1H)-one (4m)

The product **4m** (9.7 mg, 45% yield) was purified with silica gel chromatography as white solid, mp: 166 – 167 °C, **3b** (53.5 mg, 95% yield) was isolated simultaneously, eluent: (PE:EA=10:1 to 1:1). <sup>1</sup>H NMR (400 MHz, CDCl<sub>3</sub>) δ 12.18 (br, 1H), 7.92 (s, 1H), 7.58 (d, *J* = 8.0 Hz, 1H), 7.50 – 7.46 (m, 1H), 7.40 (d, *J* = 8.0 Hz, 1H), 7.23 – 7.20 (m, 1H), 5.17 (t, *J* = 6.6 Hz, 1H), 4.19 – 4.14 (m, 1H), 3.99 (q, *J* = 7.2 Hz, 1H), 2.66 – 2.58 (m, 1H), 2.10 – 1.91 (m, 2H), 1.85 – 1.77 (m, 1H); <sup>13</sup>C NMR (101 MHz, CDCl<sub>3</sub>) δ 163.1, 137.4, 135.1, 134.2, 129.7, 127.7, 122.6, 120.0, 115.6, 76.1, 68.7, 32.5, 25.7. HRMS (ESI) *m/z*: [M+H]<sup>+</sup> Calcd for C<sub>13</sub>H<sub>14</sub>O<sub>2</sub>N: 216.1019; Found: 216.1018.

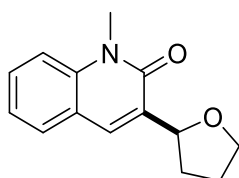

**1-methyl-3-(tetrahydrofuran-2-yl)quinolin-2(1H)-one (4n)**

This compound is known. <sup>[12]</sup> The product **4n** (12.6 mg, 55% yield) was purified with silica gel chromatography as colorless liquid, **3b** (47.8 mg, 85% yield) was isolated simultaneously, eluent: (PE:EA=10:1 to 3:1). <sup>1</sup>H NMR (400 MHz, CDCl<sub>3</sub>) δ 7.79 (s, 1H), 7.57 (d, *J* = 7.6 Hz, 1H), 7.51 (t, *J* = 8.0 Hz, 1H), 7.33 (d, *J* = 8.4 Hz, 1H), 7.22 (t, *J* = 7.4 Hz, 1H), 5.08 (t, *J* = 7.2 Hz, 1H), 4.12 (q, *J* = 6.9 Hz, 1H), 3.94 (q, *J* = 7.5 Hz, 1H), 3.72 (s, 3H) 2.59 – 2.51 (m, 1H), 2.03 – 1.97 (m, 1H), 1.94 – 1.87 (m, 1H), 1.76 – 1.67 (m, 1H); <sup>13</sup>C NMR (101 MHz, CDCl<sub>3</sub>) δ 161.2, 138.9, 135.0, 132.3 (d, *J* = 3.4 Hz), 129.7, 128.6, 122.1, 120.4, 113.8, 76.5 (d, *J* = 7.1 Hz), 68.6, 32.3, 29.3 (d, *J* = 5.7 Hz), 25.6.

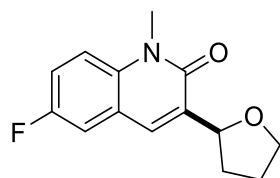

**6-fluoro-1-methyl-3-(tetrahydrofuran-2-yl)quinolin-2(1H)-one (4o)**

The product **4o** (11.2 mg, 45% yield) was purified with silica gel chromatography as white solid, mp: 107 – 108 °C, **3b** (50.6 mg, 90% yield) was isolated simultaneously,

eluent: (PE:EA=10:1 to 3:1). **<sup>1</sup>H NMR** (400 MHz, CDCl<sub>3</sub>) δ 7.76 (s, 1H), 7.35 – 7.31 (m, 1H), 7.29 – 7.27 (m, 2H), 5.10 (t, *J* = 7.0 Hz, 1H), 4.14 (q, *J* = 6.9 Hz, 1H), 3.97 (q, *J* = 7.5 Hz, 1H), 3.74 (s, 3H), 2.63 – 2.54 (m, 1H), 2.06 – 1.98 (m, 1H), 1.97 – 1.90 (m, 1H), 1.77 – 1.69 (m, 1H); **<sup>13</sup>C NMR** (101 MHz, CDCl<sub>3</sub>) δ 160.8, 158.7 (d, *J* = 424.8 Hz), 136.6, 135.5 (d, *J* = 1.4 Hz), 131.4 (dd, *J* = 7.7, 2.8 Hz), 121.3 (d, *J* = 8.6 Hz), 117.4 (d, *J* = 24.2 Hz), 115.4 (d, *J* = 7.8 Hz), 113.5 (dd, *J* = 22.6, 7.5 Hz), 76.5 (d, *J* = 12.5 Hz), 68.7, 32.3 (d, *J* = 3.6 Hz), 29.5 (d, *J* = 10.0 Hz), 25.7; **<sup>19</sup>F NMR** (376 MHz, CDCl<sub>3</sub>) δ -121.24 – -121.29 (m, 1F). **HRMS** (ESI) *m/z*: [M+H]<sup>+</sup> Calcd for C<sub>14</sub>H<sub>15</sub>O<sub>2</sub>NF: 248.1081; Found: 248.1083.

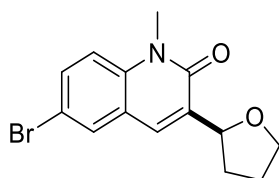

**6-bromo-1-methyl-3-(tetrahydrofuran-2-yl)quinolin-2(1H)-one (4p)**

The product **4p** (15.1 mg, 49% yield) was purified with silica gel chromatography as white solid, mp: 99 – 100 °C, **3b** (48.4 mg, 86% yield) was isolated simultaneously, eluent: (PE:EA=10:1 to 3:1). **<sup>1</sup>H NMR** (400 MHz, CDCl<sub>3</sub>) δ 7.71 (s, 2H), 7.60 (d, *J* = 8.8 Hz, 1H), 7.22 (d, *J* = 8.8 Hz, 1H), 5.07 (t, *J* = 7.0 Hz, 1H), 4.11 (q, *J* = 7.1 Hz, 1H), 3.95 (q, *J* = 7.5 Hz, 1H), 3.70 (s, 3H), 2.60 – 2.51 (m, 1H), 2.04 – 1.96 (m, 1H), 1.94 – 1.87 (m, 1H), 1.75 – 1.68 (m, 1H); **<sup>13</sup>C NMR** (101 MHz, CDCl<sub>3</sub>) δ 160.8, 137.9, 136.5, 132.4, 131.1 (d, *J* = 5.6 Hz), 130.7 (d, *J* = 5.5 Hz), 122.0, 115.6, 114.9, 76.5 (d, *J* = 10.3 Hz), 68.7, 32.3, 29.4 (d, *J* = 8.1 Hz), 25.7. **HRMS** (ESI) *m/z*: [M+H]<sup>+</sup> Calcd for C<sub>14</sub>H<sub>15</sub>O<sub>2</sub>NBr: 308.0281; Found: 308.0282.

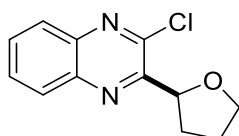

**2-chloro-3-(tetrahydrofuran-2-yl)quinoxaline (4q)**

This compound is known. <sup>[13]</sup> The product **4q** (13.6 mg, 58% yield) was purified with silica gel chromatography as black liquid, **3b** (39.9 mg, 71% yield) was isolated



simultaneously, eluent: (PE:EA=20:1 to 15:1). **<sup>1</sup>H NMR** (400 MHz, CDCl<sub>3</sub>) δ 8.16 – 8.14 (m, 1H), 8.00 – 7.98 (m, 1H), 7.77 – 7.74 (m, 2H), 5.56 (t, *J* = 6.8 Hz, 1H), 4.27 (q, *J* = 7.2 Hz, 1H), 4.06 (q, *J* = 7.2 Hz, 1H), 2.56 – 2.48 (m, 1H), 2.27 – 2.19 (m, 1H), 2.17 – 2.05 (m, 2H); **<sup>13</sup>C NMR** (101 MHz, CDCl<sub>3</sub>) δ 154.5, 145.9, 141.3, 140.6, 130.6, 130.2, 129.3, 128.0, 77.9, 69.5, 30.9, 25.7.

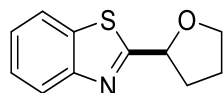

#### **2-(tetrahydrofuran-2-yl)benzo[d]thiazole (4r)**

This compound is known.<sup>[14]</sup> The product **4r** (12.3 mg, 60% yield) was purified with silica gel chromatography as colorless liquid, **3b** (52.3 mg, 93% yield) was isolated simultaneously, eluent: (PE:EA=10:1 to 2:1). **<sup>1</sup>H NMR** (400 MHz, CDCl<sub>3</sub>) δ 7.97 (d, *J* = 8.0 Hz, 1H), 7.88 (d, *J* = 8.0 Hz, 1H), 7.48 – 7.44 (m, 1H), 7.38 – 7.34 (m, 1H), 5.35 (t, *J* = 6.6 Hz, 1H), 4.16 (q, *J* = 7.2 Hz, 1H), 4.00 (q, *J* = 7.5 Hz, 1H), 2.57 – 2.48 (m, 1H), 2.31 – 2.23 (m, 1H), 2.07 – 1.99 (m, 2H); **<sup>13</sup>C NMR** (101 MHz, CDCl<sub>3</sub>) δ 176.4, 153.5, 134.6, 125.9, 124.7, 122.7, 121.7, 78.7 (d, *J* = 6.6 Hz), 69.4, 33.3, 25.6.

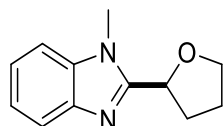

#### **1-methyl-2-(tetrahydrofuran-2-yl)-1H-benzo[d]imidazole (4s)**

This compound is known.<sup>[15]</sup> The product **4s** (10.5 mg, 52% yield) was purified with silica gel chromatography as colorless liquid, **3b** (50.6 mg, 90% yield) was isolated simultaneously, eluent: (PE:EA=10:1 to 2:1). **<sup>1</sup>H NMR** (400 MHz, CDCl<sub>3</sub>) δ 7.78 (d, *J* = 7.6 Hz, 1H), 7.35 (d, *J* = 7.2 Hz, 1H), 7.31 – 7.24 (m, 2H), 5.22 (t, *J* = 7.0 Hz, 1H), 3.95 (t, *J* = 6.8 Hz, 2H), 3.87 (s, 3H), 2.85 – 2.76 (m, 1H), 2.42 – 2.33 (m, 1H), 2.24 – 2.18 (m, 1H), 2.12 – 2.03 (m, 1H); **<sup>13</sup>C NMR** (101 MHz, CDCl<sub>3</sub>) δ 153.5, 141.6, 136.1, 122.7, 122.1, 119.7 (d, *J* = 6.8 Hz), 109.2, 73.5 (d, *J* = 11.5 Hz), 68.7, 30.2 (d, *J* = 10.7 Hz), 29.3, 26.0.

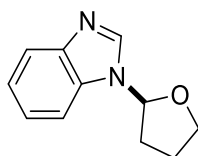

#### 1-(tetrahydrofuran-2-yl)-1H-benzo[d]imidazole (**4t**)

This compound is known. <sup>[16]</sup> The product **4t** (10.2 mg, 54% yield) was purified with silica gel chromatography as colorless liquid, **3b** (54.0 mg, 96% yield) was isolated simultaneously, eluent: (PE:EA=1:1 to 1:3). <sup>1</sup>H NMR (400 MHz, CDCl<sub>3</sub>) δ 8.00 (s, 1H), 7.80 – 7.77 (m, 1H), 7.45 – 7.43 (m, 1H), 7.28 – 7.26 (m, 2H), 6.16 – 6.13 (m, 1H), 4.15 (q, *J* = 7.2 Hz, 1H), 4.02 (q, *J* = 7.7 Hz, 1H), 2.43 – 2.37 (m, 2H), 2.14 – 2.09 (m, 2H); <sup>13</sup>C NMR (101 MHz, CDCl<sub>3</sub>) δ 144.1, 140.2, 132.5, 123.1, 122.5, 120.3, 110.4, 86.0, 68.9, 31.8, 24.2.

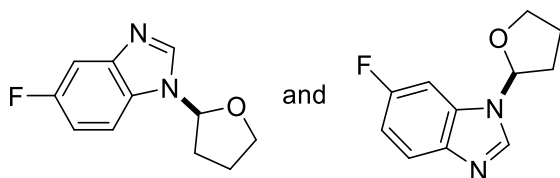

#### 5-fluoro-1-(tetrahydrofuran-2-yl)-1H-benzo[d]imidazole and 6-fluoro-1-(tetrahydrofuran-2-yl)-1H-benzo[d]imidazole (**4u**)

The product **4u** (12.6 mg, 61% yield) was purified with silica gel chromatography as colorless liquid, **3b** (53.5 mg, 95% yield) was isolated simultaneously, eluent: (PE:EA=1:1 to 1:3). Mixture of isomers: (1:1) <sup>1</sup>H NMR (400 MHz, CDCl<sub>3</sub>) δ 8.03 (s, 1H), 7.99 (s, 1H), 7.70 (q, *J* = 4.5 Hz, 1H), 7.45 (dd, *J* = 9.2, 6.8 Hz, 1H), 7.38 (q, *J* = 4.5 Hz, 1H), 7.15 (dd, *J* = 8.8, 6.0 Hz, 1H), 7.03 (qd, *J* = 9.0, 2.8 Hz, 2H), 6.14 (t, *J* = 4.8 Hz, 1H), 6.09 (t, *J* = 4.8 Hz, 1H), 4.19 – 4.14 (m, 2H), 4.08 – 4.02 (m, 2H), 2.48 – 2.37 (m, 4H), 2.19 – 2.09 (m, 4H); <sup>13</sup>C NMR (101 MHz, CDCl<sub>3</sub>) δ 160.7 (d, *J* = 30.9 Hz), 158.3 (d, *J* = 28.5 Hz), 144.6 (d, *J* = 11.4 Hz), 141.5, 141.5, 140.7 (d, *J* = 2.8 Hz), 140.5 (d, *J* = 1.0 Hz), 129.1, 121.0 (d, *J* = 10.3 Hz), 111.5 (d, *J* = 26.4 Hz), 110.9 (d, *J* = 9.2 Hz), 110.8 (d, *J* = 5.7 Hz), 106.0 (d, *J* = 24.1 Hz), 97.3 (d, *J* = 28.0 Hz), 86.1, 86.0, 68.9, 68.9, 31.8, 31.7, 24.2, 24.1. <sup>19</sup>F NMR (376 MHz, CDCl<sub>3</sub>) δ -118.3 (s, 1F), -120.7 (s, 1F). HRMS (ESI) *m/z*: [M+H]<sup>+</sup> Calcd for C<sub>11</sub>H<sub>12</sub>ON<sub>2</sub>F: 207.0928; Found: 207.0929.

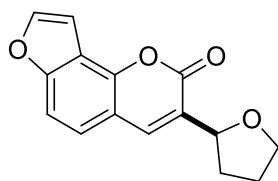

**3-(tetrahydrofuran-2-yl)-2H-furo[2,3-*h*]chromen-2-one (4v-1)**

The product **4v-1** (14.4 mg, 56% yield) was purified with silica gel chromatography as white solid, mp: 96 – 97 °C, **3b** (50.6 mg, 90% yield) was isolated simultaneously, eluent: (PE:EA=20:1 to 10:1). **<sup>1</sup>H NMR** (400 MHz, CDCl<sub>3</sub>) δ 7.90 (s, 1H), 7.68 (d, *J* = 2.0 Hz, 1H), 7.41 (q, *J* = 8.4 Hz, 2H), 7.12 (d, *J* = 2.0 Hz, 1H), 4.98 (t, *J* = 6.8 Hz, 1H), 4.13 (q, *J* = 6.9 Hz, 1H), 3.96 (q, *J* = 7.5 Hz, 1H), 2.57 – 2.49 (m, 1H), 2.08 – 1.99 (m, 1H), 1.98 – 1.90 (m, 1H), 1.83 – 1.75 (m, 1H); **<sup>13</sup>C NMR** (101 MHz, CDCl<sub>3</sub>) δ 160.5, 156.8, 147.2, 145.7, 137.6, 128.4, 123.8, 116.5, 113.8, 108.7, 104.0, 75.9, 68.9, 32.2, 25.6. **HRMS** (ESI) *m/z*: [M+H]<sup>+</sup> Calcd for C<sub>15</sub>H<sub>13</sub>O<sub>4</sub>: 257.0808; Found: 257.0710.

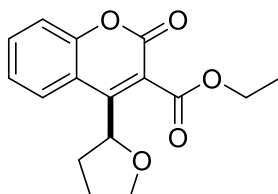

**ethyl 2-oxo-4-(tetrahydrofuran-2-yl)-2H-chromene-3-carboxylate (4w)**

The product **4w** (13.8 mg, 48% yield) was purified with silica gel chromatography as colorless liquid, **3b** (46.1 mg, 82% yield) was isolated simultaneously, eluent: (PE:EA=20:1 to 5:1). **<sup>1</sup>H NMR** (400 MHz, CDCl<sub>3</sub>) δ 7.56 (t, *J* = 8.2 Hz, 2H), 7.37 (d, *J* = 8.4 Hz, 1H), 7.30 (t, *J* = 7.8 Hz, 1H), 5.32 (t, *J* = 7.4 Hz, 1H), 4.37 (q, *J* = 7.1 Hz, 2H), 3.98 (q, *J* = 7.1 Hz, 1H), 3.90 (q, *J* = 7.1 Hz, 1H), 2.60 – 2.51 (m, 1H), 2.17 – 2.08 (m, 1H), 2.07 – 1.97 (m, 2H), 1.38 (t, *J* = 7.2 Hz, 3H); **<sup>13</sup>C NMR** (101 MHz, CDCl<sub>3</sub>) δ 165.2, 158.8, 152.8, 152.4, 132.2, 124.7, 124.6, 119.0, 117.4, 116.9, 76.3, 69.6, 61.7, 33.8, 26.1, 14.1. **HRMS** (ESI) *m/z*: [M+H]<sup>+</sup> Calcd for C<sub>16</sub>H<sub>17</sub>O<sub>5</sub>: 289.1071; Found: 289.1072.

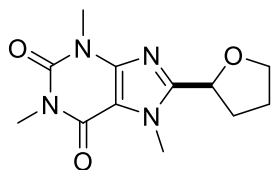

### 1,3,7-trimethyl-8-(tetrahydrofuran-2-yl)-1,3,6,7-tetrahydro-2H-purin-2-one (4x)

The product **4x** (12.5 mg, 50% yield) was purified with silica gel chromatography as white solid, mp: 115 – 116 °C, **3b** (52.3 mg, 93% yield) was isolated simultaneously, eluent: (PE:EA=1:1 to 1:5). **<sup>1</sup>H NMR** (400 MHz, CDCl<sub>3</sub>) δ 5.03 (t, *J* = 6.8 Hz, 1H), 4.03 (s, 3H), 3.99 – 3.89 (m, 2H), 3.56 (s, 3H), 3.39 (s, 3H), 2.61 – 2.52 (m, 1H), 2.33 – 2.25 (m, 1H), 2.21 – 2.11 (m, 1H), 2.10 – 2.00 (m, 1H); **<sup>13</sup>C NMR** (101 MHz, CDCl<sub>3</sub>) δ 155.5, 152.3, 151.7, 147.2, 108.3, 72.5, 68.9, 32.2, 29.8, 29.6, 27.9, 25.9. **HRMS** (ESI) *m/z*: [M+H]<sup>+</sup> Calcd for C<sub>12</sub>H<sub>17</sub>O<sub>3</sub>N<sub>4</sub>: 265.1295; Found: 265.1293.

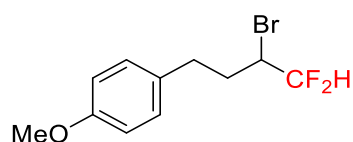

### 1-(3-bromo-4,4-difluorobutyl)-4-methoxybenzene (1k-CF<sub>2</sub>H)

Obtained in 72% yield as a colorless liquid (0.20 g). **<sup>1</sup>H NMR** (400 MHz, CDCl<sub>3</sub>) δ 7.14 (d, *J* = 8.4 Hz, 2H), 6.86 (d, *J* = 8.8 Hz, 2H), 5.83 (dt, *J* = 56.0, 2.4 Hz, 1H), 3.92 – 3.83 (m, 1H), 3.80 (s, 3H), 2.96 – 2.89 (m, 1H), 2.75 – 2.67 (m, 1H), 2.28 – 2.20 (m, 1H), 2.14 – 2.04 (m, 1H). **<sup>13</sup>C NMR** (101 MHz, CDCl<sub>3</sub>) δ 158.2, 131.6, 129.5, 114.7 (t, *J* = 246.6 Hz), 114.0, 55.2, 49.8 (t, *J* = 24.0 Hz), 32.5 (t, *J* = 2.5 Hz), 31.6. **<sup>19</sup>F NMR** (376 MHz, CDCl<sub>3</sub>) δ -117.46 (ddd, *J* = 276.7, 55.6, 10.9 Hz, 1F), -122.25 (ddd, *J* = 276.7, 56.0, 13.2 Hz, 1F). **HRMS** (DART) *m/z*: [M+H]<sup>+</sup> Calcd for C<sub>11</sub>H<sub>14</sub>OF<sub>2</sub>Br: 279.0191; Found: 279.0195.

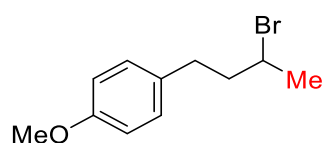

### 1-(3-bromobutyl)-4-methoxybenzene (1k-CH<sub>3</sub>)

This compound is known<sup>[17]</sup>. Obtained in 81% yield as a colorless liquid (196mg). **<sup>1</sup>H**

**NMR** (400 MHz, CDCl<sub>3</sub>)  $\delta$  7.13 (d,  $J$  = 8.4 Hz, 2H), 6.85 (d,  $J$  = 8.4 Hz, 2H), 4.11 – 4.03 (m, 1H), 3.80 (s, 3H), 2.85 – 2.78 (m, 1H), 2.73 – 2.66 (m, 1H), 2.16 – 2.06 (m, 1H), 2.05 – 1.96 (m, 1H), 1.73 (d,  $J$  = 4.4 Hz, 3H). **<sup>13</sup>C NMR** (101 MHz, CDCl<sub>3</sub>)  $\delta$  157.9, 132.9, 129.4, 113.8, 55.2, 51.0, 42.9, 33.0, 26.5.

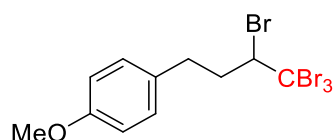

**1-methoxy-4-(3,4,4,4-tetrabromobutyl)benzene (1k-CBr<sub>3</sub>)**

Obtained in 65% yield as a colorless liquid (311 mg). **<sup>1</sup>H NMR** (400 MHz, CDCl<sub>3</sub>)  $\delta$  7.11 (d,  $J$  = 8.8 Hz, 2H), 6.87 (d,  $J$  = 8.4 Hz, 2H), 6.40 (t,  $J$  = 7.2 Hz, 1H), 3.80 (s, 3H), 2.68 (t,  $J$  = 7.6 Hz, 2H), 2.38 (q,  $J$  = 7.5 Hz, 2H). **<sup>13</sup>C NMR** (101 MHz, CDCl<sub>3</sub>)  $\delta$  158.0, 137.7, 132.6, 129.3, 113.9, 89.3, 55.2, 35.0, 33.0. **HRMS** (DART)  $m/z$ : [M+H-Br<sub>2</sub>]<sup>+</sup> Calcd for C<sub>11</sub>H<sub>13</sub>OBr<sub>2</sub>: 318.9328; Found: 318.9340.

## 8. Reference :

- [1] (a) K. Okada, K. Okamoto, M. Oda, A new and practical method of decarboxylation: photosensitized decarboxylation of N-acyloxyphthalimides via electron-transfer mechanism, *J. Am. Chem. Soc.*, **1988**, *110*, 8736–8738; (b) K. Okada, K. Okamoto, N. Morita, K. Okubo, M. Oda, Photosensitized decarboxylative Michael addition through N-(acyloxy)phthalimides via an electron-transfer mechanism, *J. Am. Chem. Soc.*, **1991**, *113*, 9401–9402; (c) T. Qin, J. Cornella, C. Li, L. R. Malins, J. T. Edwards, S. Kawamura, B. D. Maxwell, M. D. Eastgate, P. S. Baran, A general alkyl-alkyl cross-coupling enabled by redox-active esters and alkylzinc reagents, *Science.*, **2016**, *352*, 801-805.
- [2] P. Guo, M. Tao, W.-W. Xu, A.-J. Wang, W. Li, Q. Yao, J. Tong, and C.-Y. He, Synthesis of secondary trifluoromethylated alkyl bromides using 2-bromo-3,3,3-trifluoropropene as a radical acceptor, *Org. Lett.*, **2022**, *24*, 2143-2148.
- [3] J. Liu, H. Gong, S. Zhu, Nickel-catalyzed, regio- and enantioselective benzylic alkenylation of olefins with alkenyl bromide, *Angew. Chem.*, **2021**, *133*, 4106–4110.
- [4] Y. Zhao, W. Huang, J. Zheng, J. Hu, Efficient and direct nucleophilic difluoromethylation of carbonyl compounds and imines with Me<sub>3</sub>SiCF<sub>2</sub>H at ambient or low temperature, *Org. Lett.*, **2011**, *13*, 5342-5345.
- [5] X. Lin, F. Zheng, F.-L. Qing, Iron-catalyzed cross-coupling reactions between arylzinc reagents and alkyl halides bearing β-fluorines, *Organometallics.*, **2012**, *31*, 1578-1582.
- [6] B. Hasimujiang, Z. Cheng, A. Wusiman, Y. Yang, A. A. Rexi, A straightforward synthesis of tribromomethyl carbinols from aldehydes and bromoform with potassium hydroxide as the catalyst, *ChemistrySelect*, **2019**, *4*, 5560–5562.
- [7] B. He, Q. Pan, Y. Guo, Q.-Y. Chen, C. Liu, Cobalt-catalyzed radical hydrotrifluoroethylation of styrenes with trifluoroethyl iodide, *Org. Lett.*, **2020**, *22*, 6552-6556.
- [8] D. J. P. Kornfilt, D. W. C. MacMillan, Copper-catalyzed trifluoromethylation of alkyl bromides, *J. Am. Chem. Soc.*, **2019**, *141*, 6853-6858.
- [9] K. Zhang, L. Qiao, J. Xie, Z. Lin, H. Li, P. Lu, Y. Wang, Visible-light-induced C(sp<sup>2</sup>)-C(sp<sup>3</sup>) coupling reaction for the regioselective synthesis of 3-functionalized

coumarins, *J. Org. Chem.*, **2021**, *86*, 9552-9562.

[10] L. Dian, H. Zhao, D. Zhang-Negrerie, Y. Du, Cobalt-Catalyzed Twofold Direct C(sp<sup>2</sup>)-C(sp<sup>3</sup>) Bond Coupling: Regioselective C-3 Alkylation of Coumarins with (Cyclo) alkyl Ethers, *Adv. Synth. Catal.*, **2016**, *358*, 2422-2426.

[11] C. Wang, X. Mi, Q. Li, Y. Li, M. Huang, J. Zhang, Y. Wu, Y. Wu, Copper-catalyzed cross-dehydrogenative-coupling (CDC) of coumarins with cyclic ethers and cycloalkane, *Tetrahedron*, **2015**, *71*, 6689-6693.

[12] G. Wang, J.-T. Wang, B. Zhao, H. Chen, P.-K. Zhang, S.-L. Han, Transition-metal-free direct cross-dehydrogenative coupling reactions of quinolinones with ethers, *Tetrahedron Letters*, **2020**, *61*, 151426.

[13] L. Li, X. Song, M.-F. Qi, B. Sun, Weak Brønsted base-promoted photoredox catalysis for CH alkylation of heteroarenes mediated by triplet excited diaryl ketone, *Tetrahedron Letters*, **2022**, *99*, 153846.

[14] J. Zhou, Y. Zou, P. Zhou, Z. Chen, J. Li, Copper-catalyzed versatile C(sp<sup>3</sup>)-H arylation: synthetic scope and regioselectivity investigations, *Org. Chem. Front.*, **2019**, *6*, 1594-1598.

[15] K. M. H. Nguyen, M. Langeron, Catalytic oxidative coupling of primary amines under air: A flexible route to benzimidazole derivatives, *Eur. J. Org. Chem.*, **2016**, *2016*, 1025-1032.

[16] K. D. Nguyen, S. H. Doan, A. N.V. Ngo, T. T. Nguyen, N. T.S. Phan, Direct C-N coupling of azoles with ethers via oxidative C-H activation under metal-organic framework catalysis, *J. Ind. Eng. Chem.*, **2016**, *44*, 136-145.

[17] T. C. Atack, R. M. Lecker, S. P. Cook, Iron-catalyzed borylation of alkyl electrophiles, *J. Am. Chem. Soc.*, **2014**, *136*, 9521-9523.

9. Copies of  $^1\text{H}$  NMR,  $^{13}\text{C}$  NMR and  $^{19}\text{F}$  NMR charts of the Products.

7.260  
7.238  
7.225  
7.216  
7.192  
7.182  
7.174  
7.168  
7.160  
3.135  
3.116  
3.097  
3.079  
2.663  
2.642  
2.624  
2.604  
2.561  
2.543  
2.524  
2.504  
2.485  
2.465  
2.247  
2.227  
2.200  
2.193  
2.179  
2.165  
2.152  
2.125  
1.831  
1.812  
1.791  
1.772

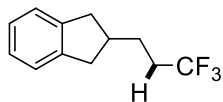

Compound 3a

$^1\text{H}$  NMR (400 MHz,  $\text{CDCl}_3$ )

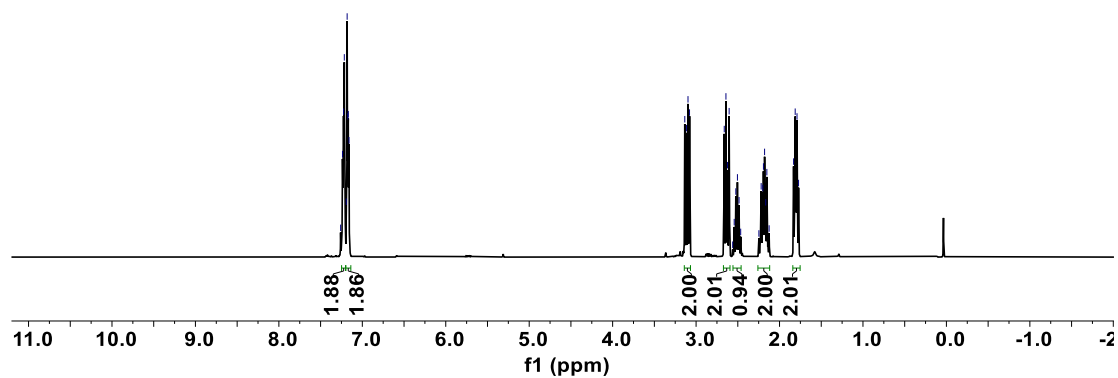

142.717  
131.282  
128.535  
126.300  
125.787  
124.411  
123.039  
77.318  
77.000  
76.682  
39.026  
38.871  
33.103  
32.820  
32.536  
32.253  
27.620  
27.592  
27.565  
27.536

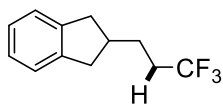

Compound 3a

$^{13}\text{C}$  NMR (101 MHz,  $\text{CDCl}_3$ )

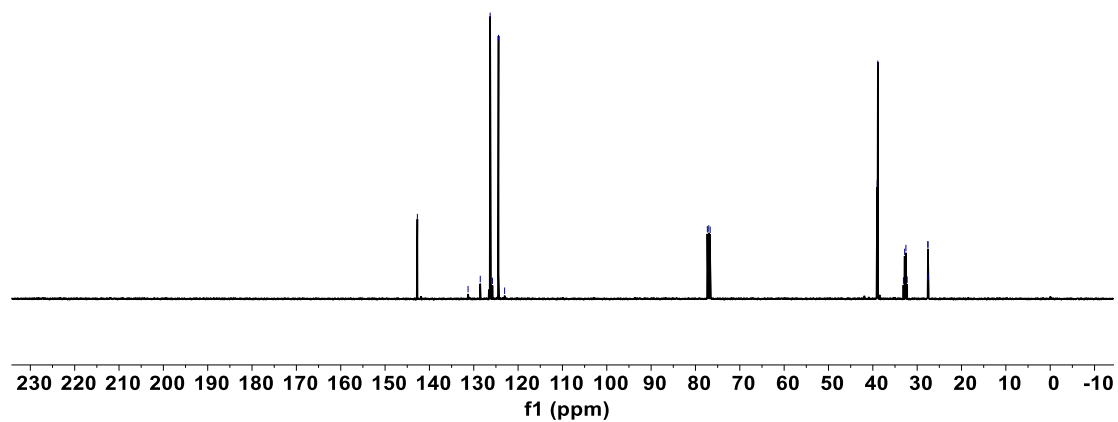



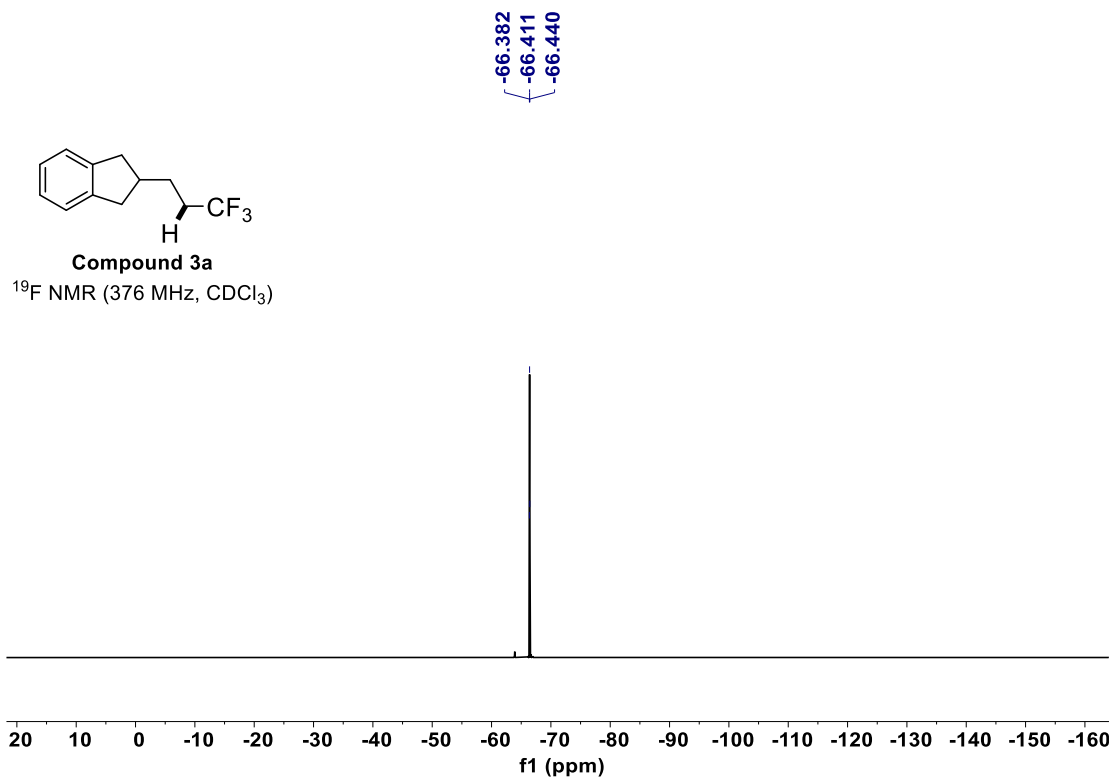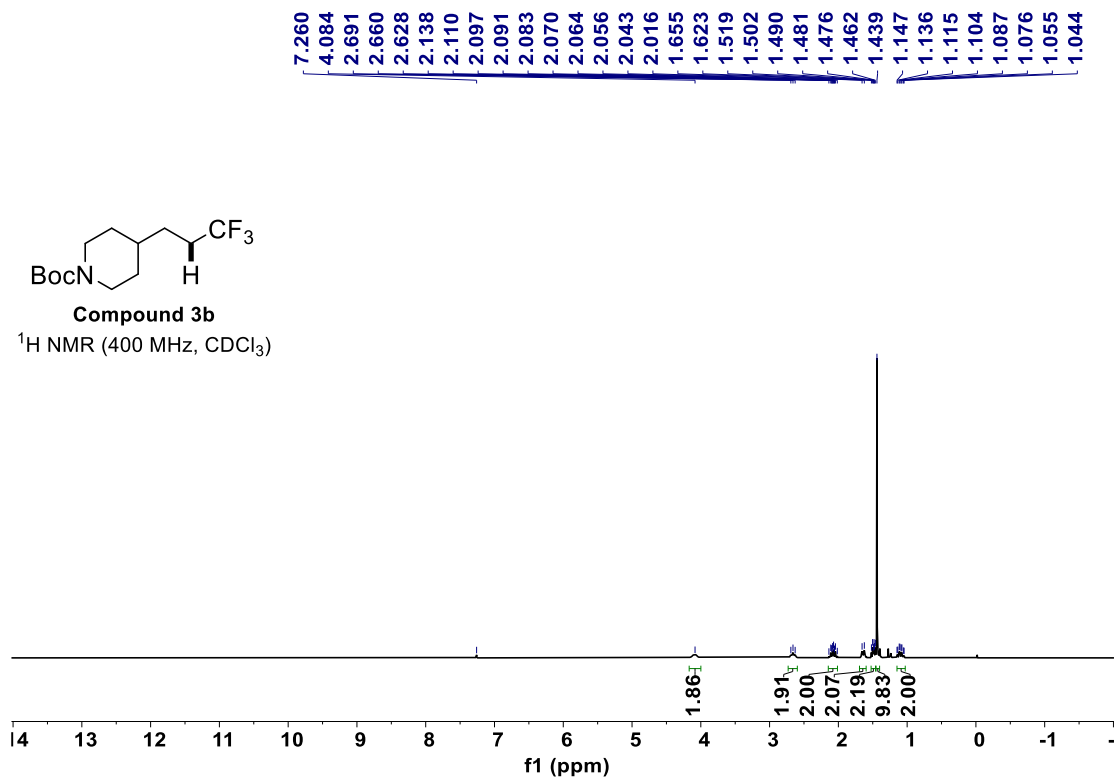

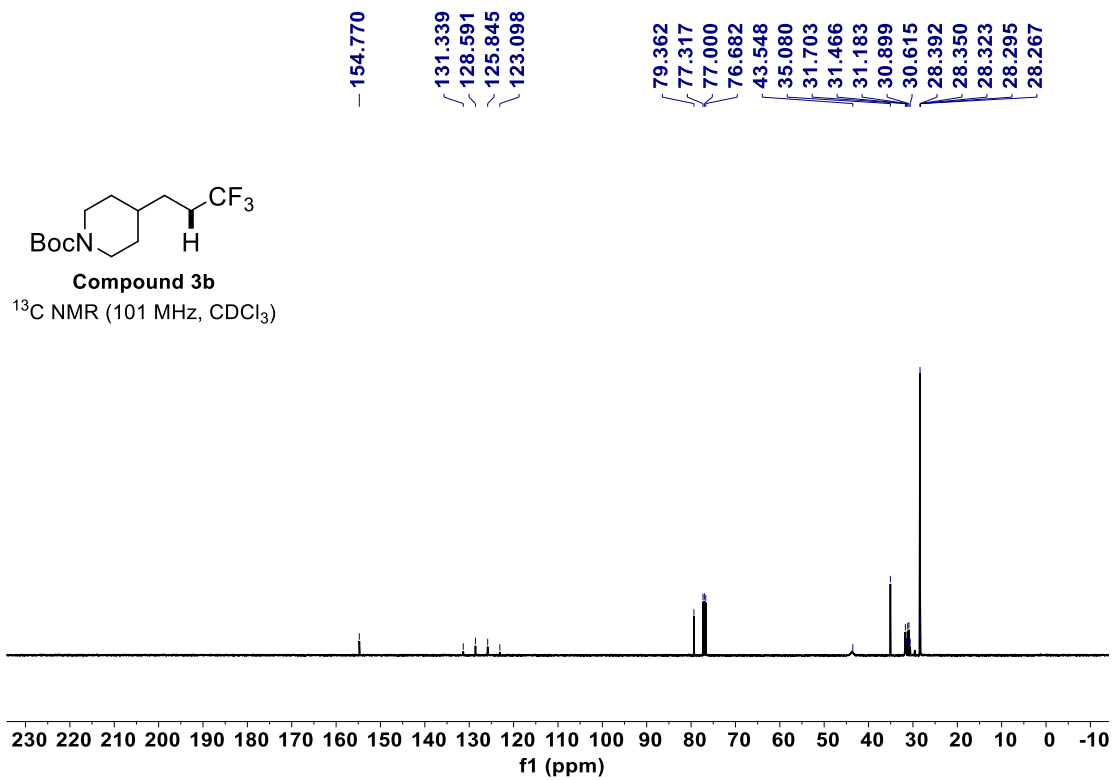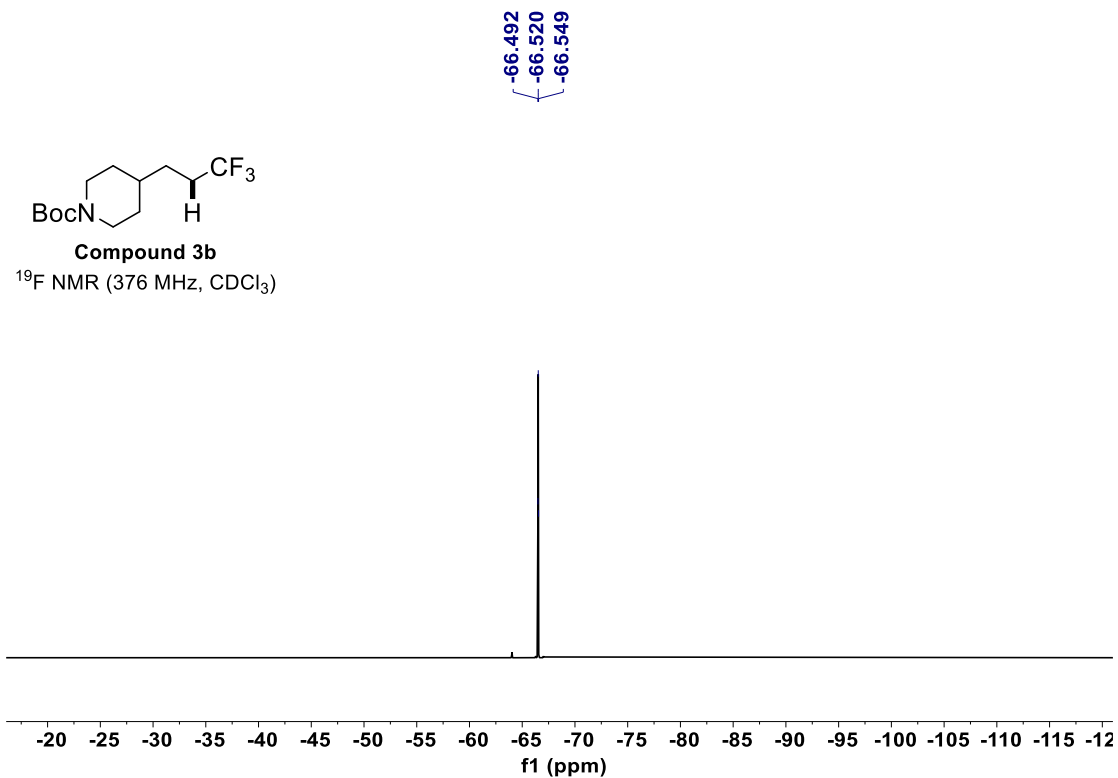

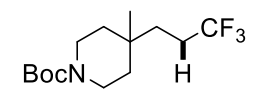

**Compound 3c**

<sup>1</sup>H NMR (400 MHz, CDCl<sub>3</sub>)

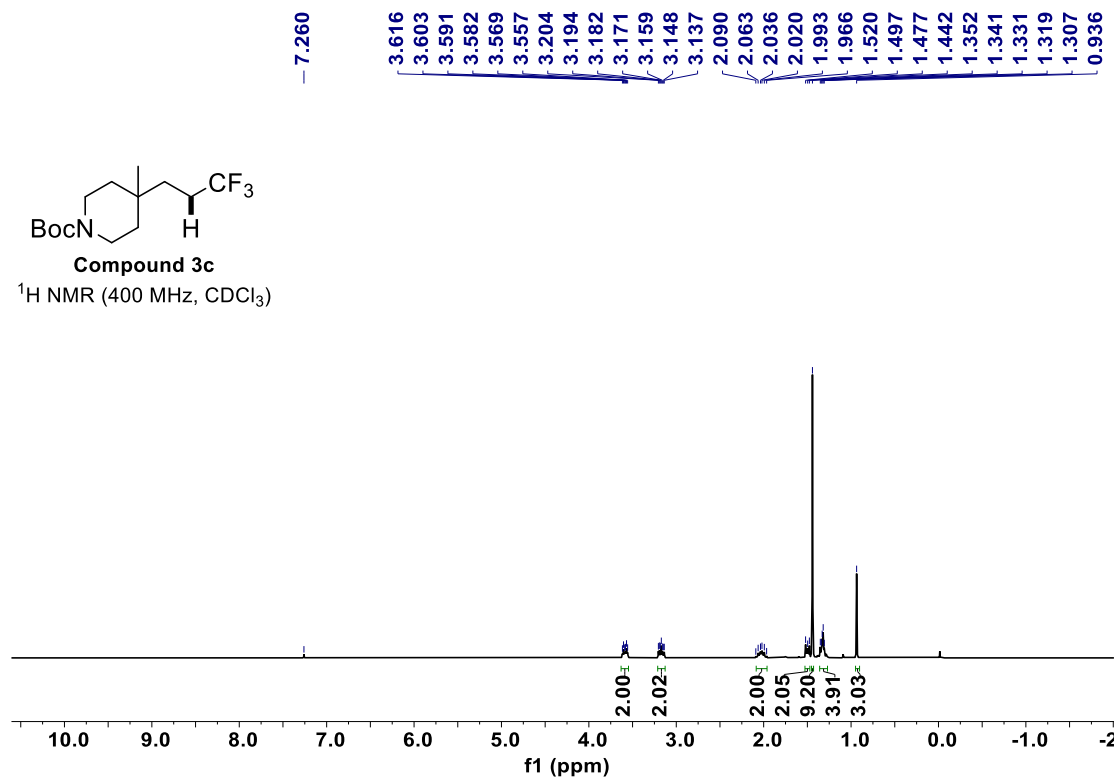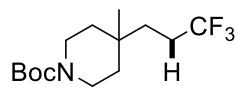

**Compound 3c**

<sup>13</sup>C NMR (101 MHz, CDCl<sub>3</sub>)

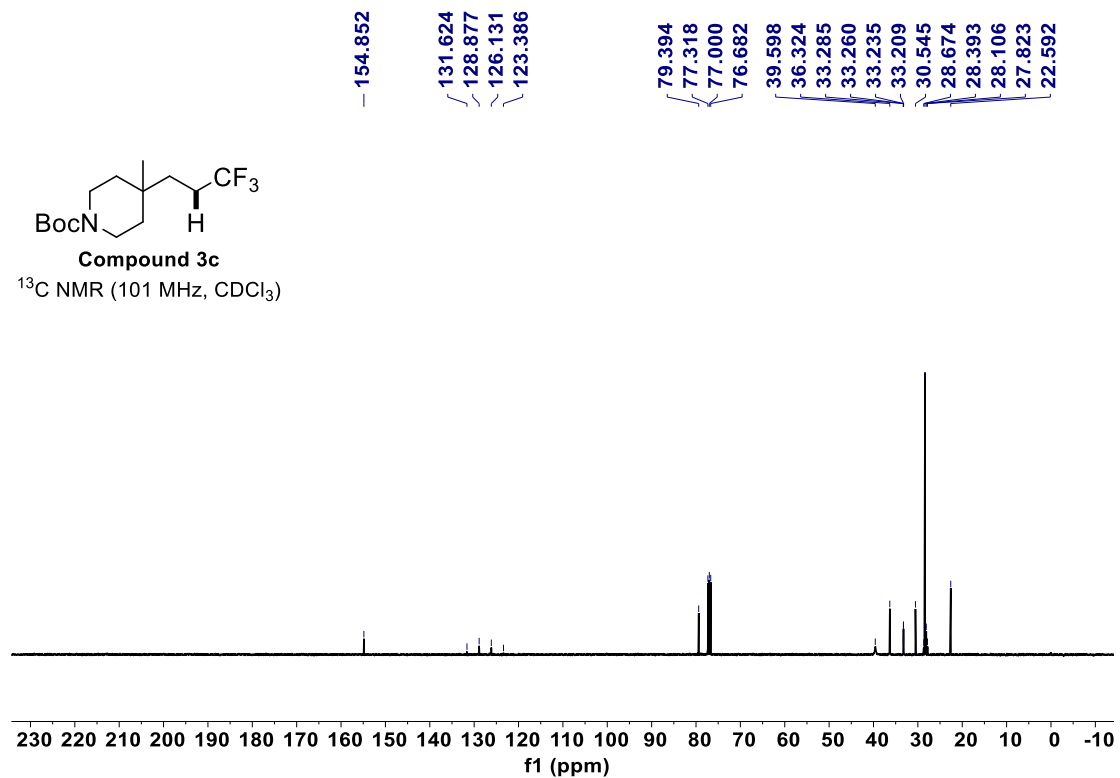

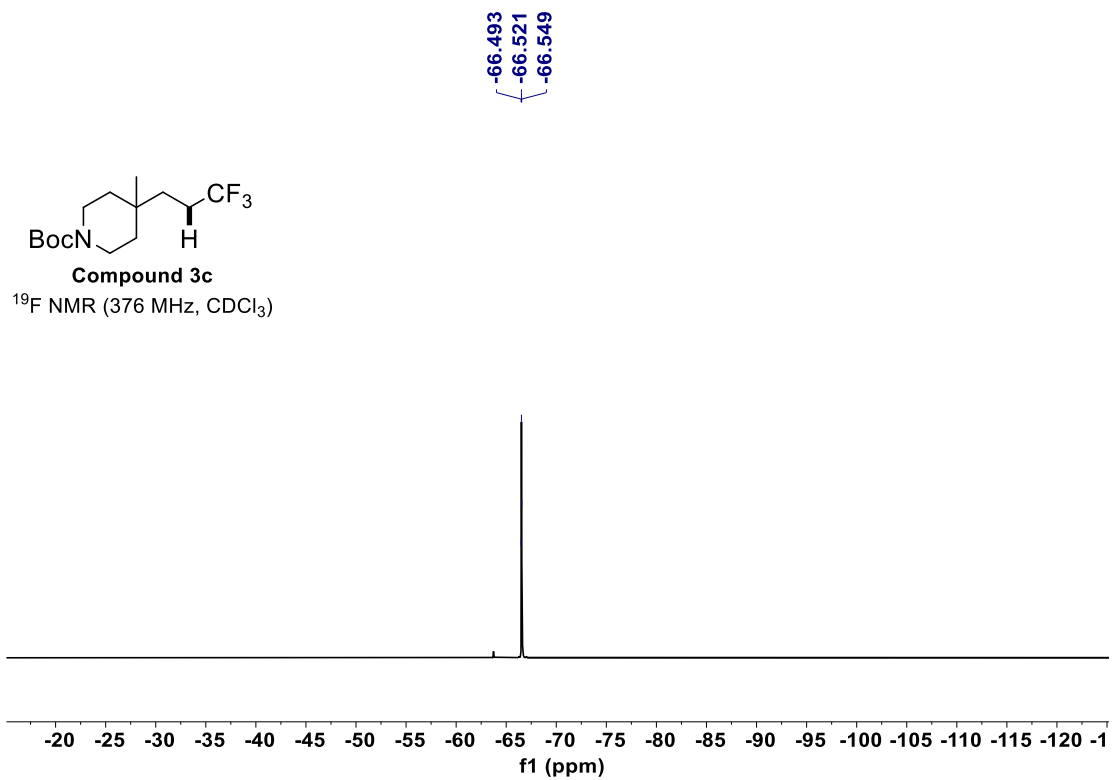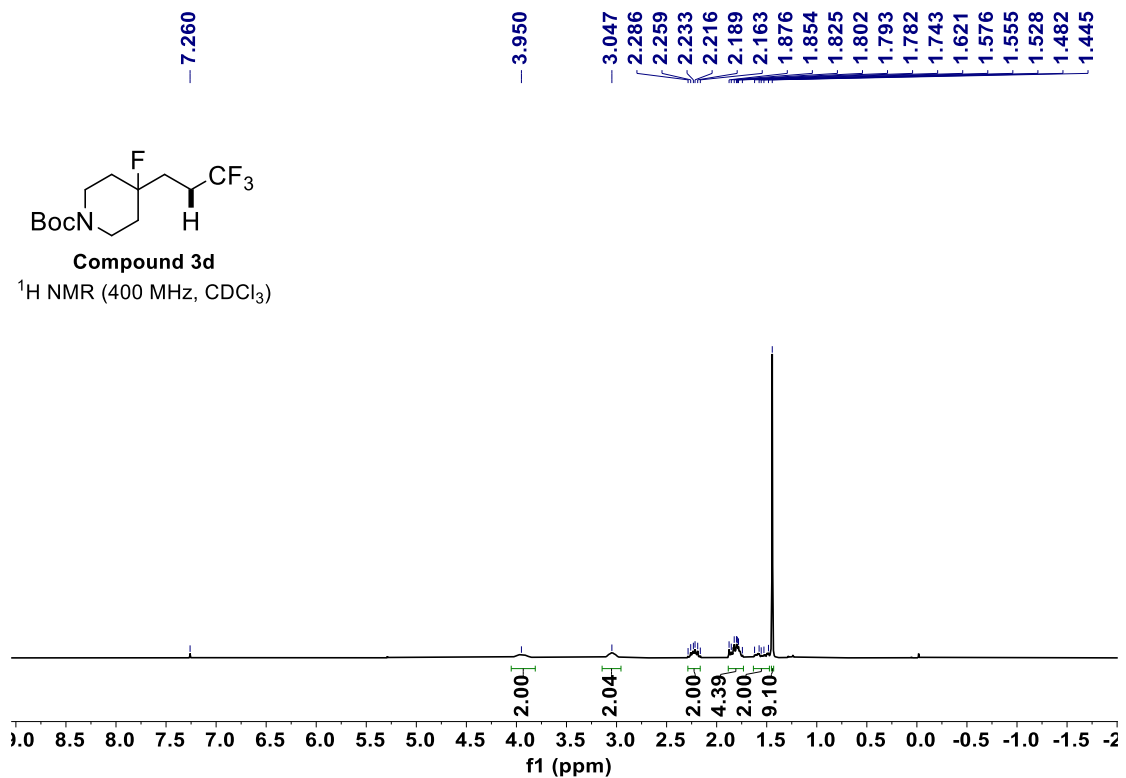

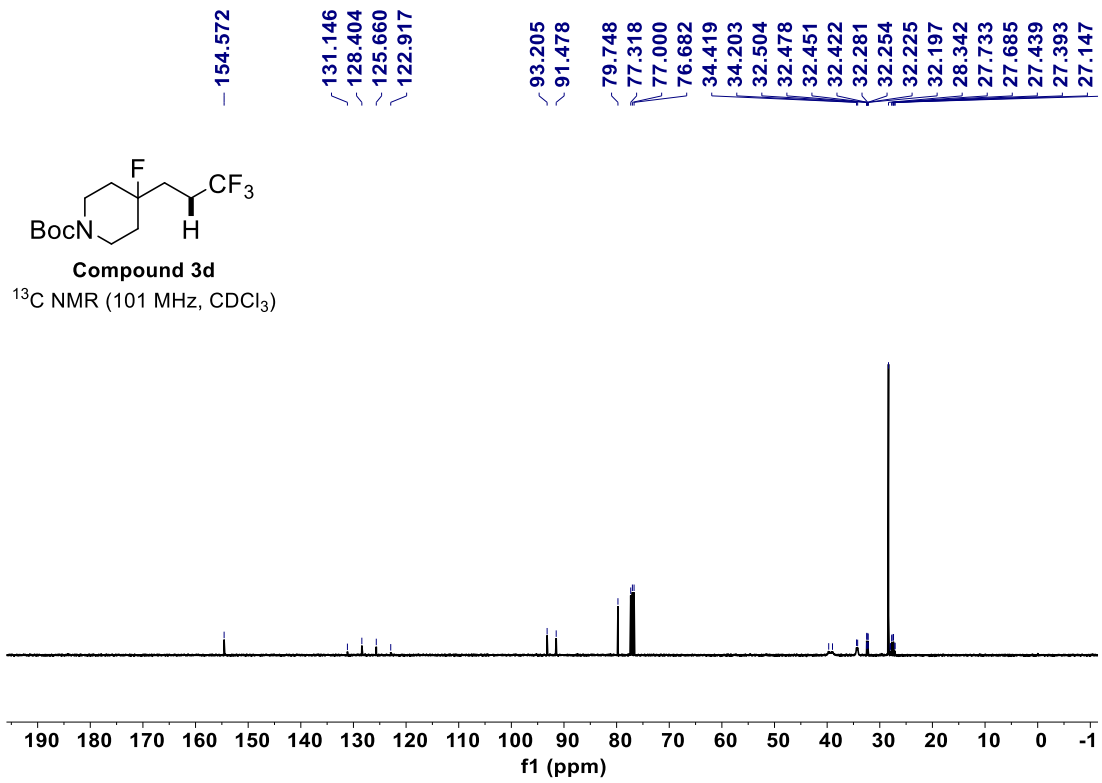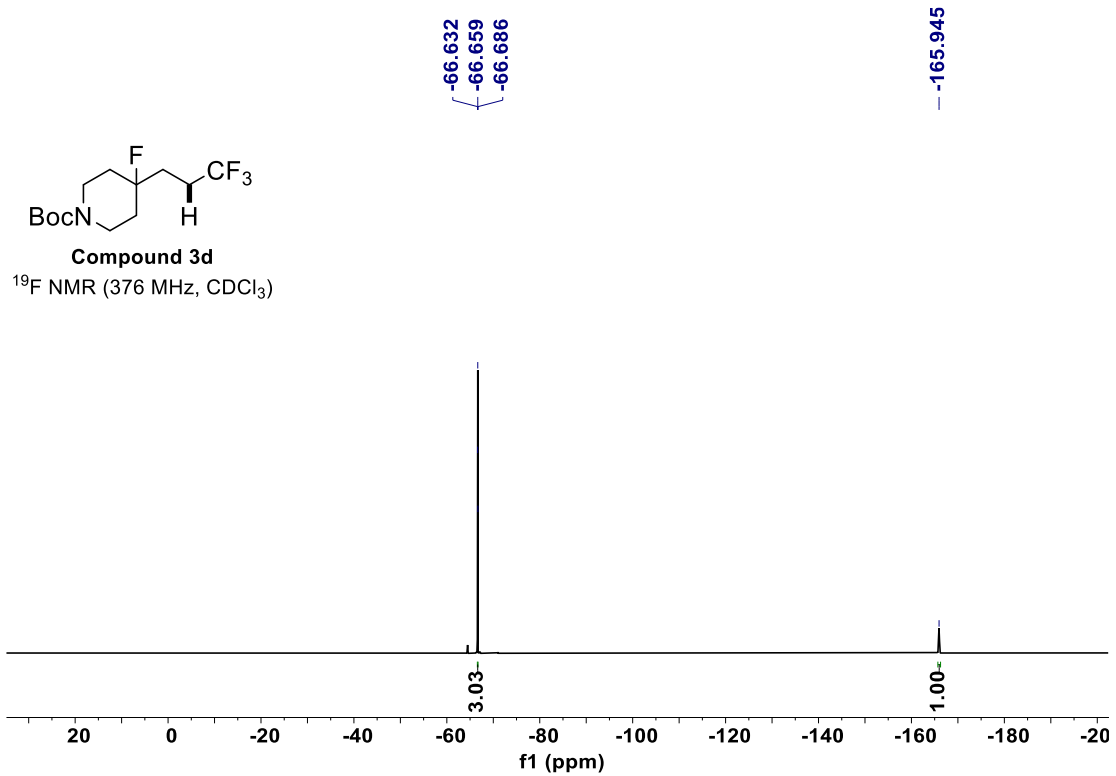

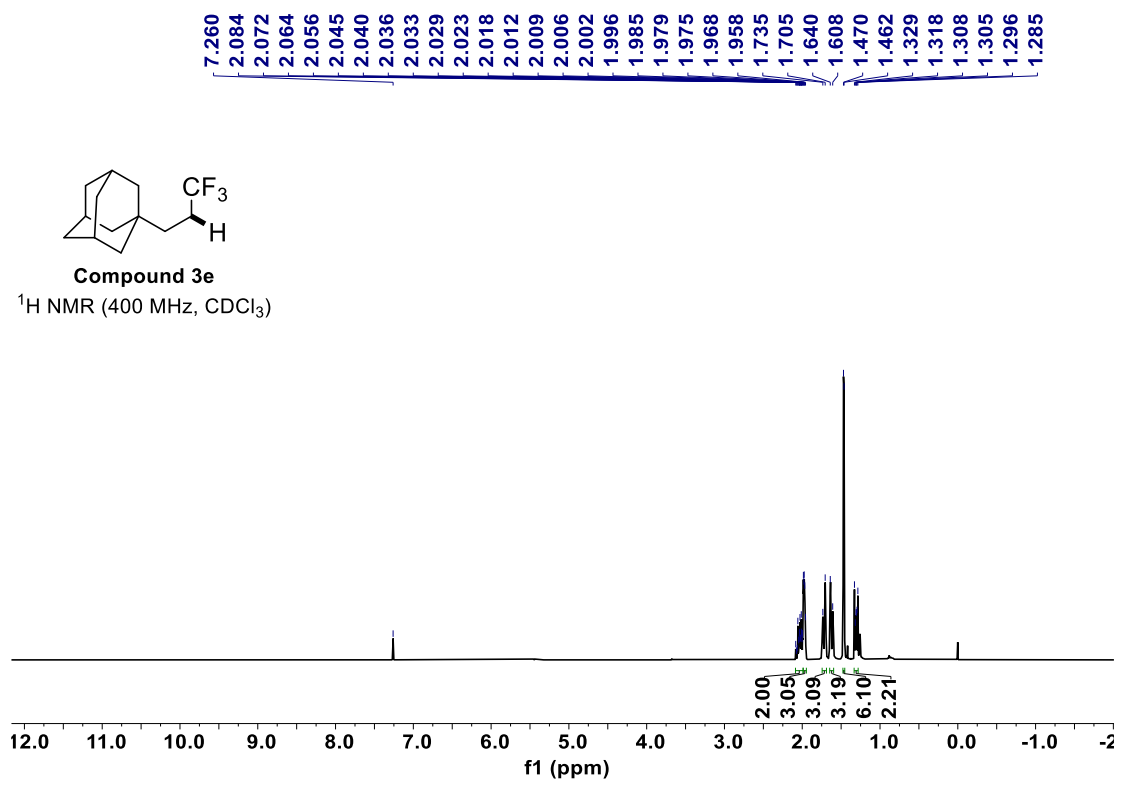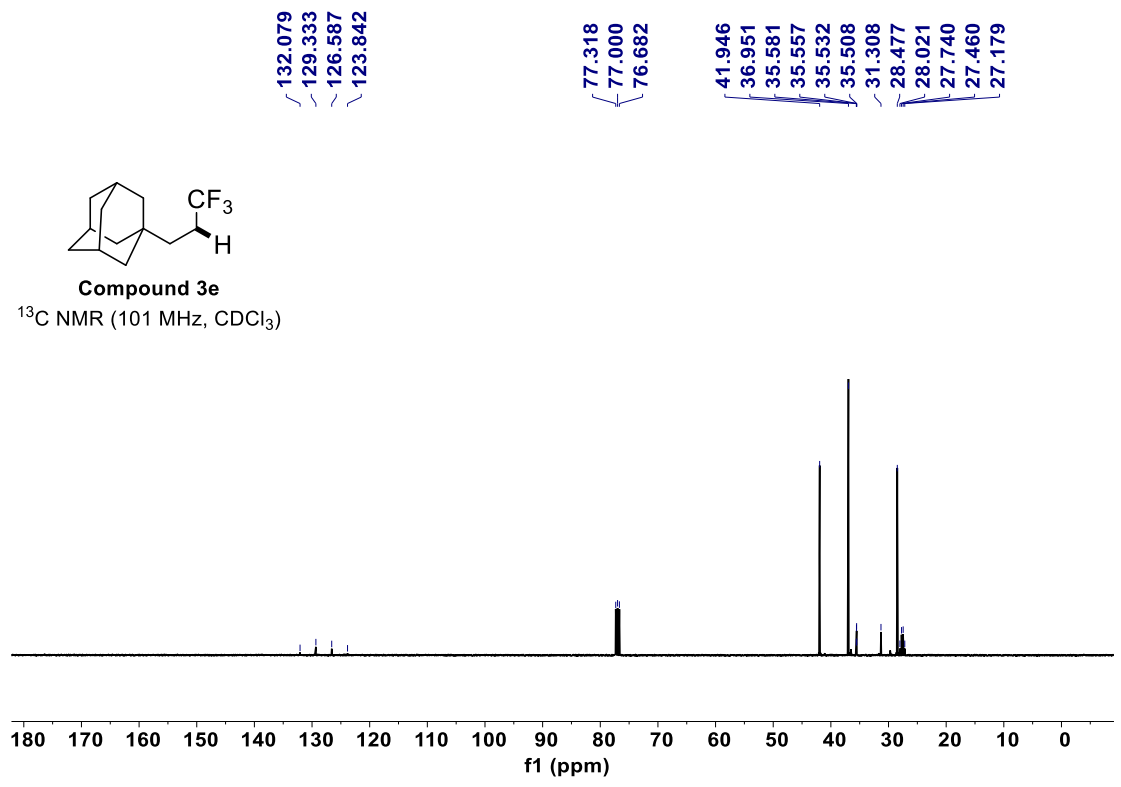

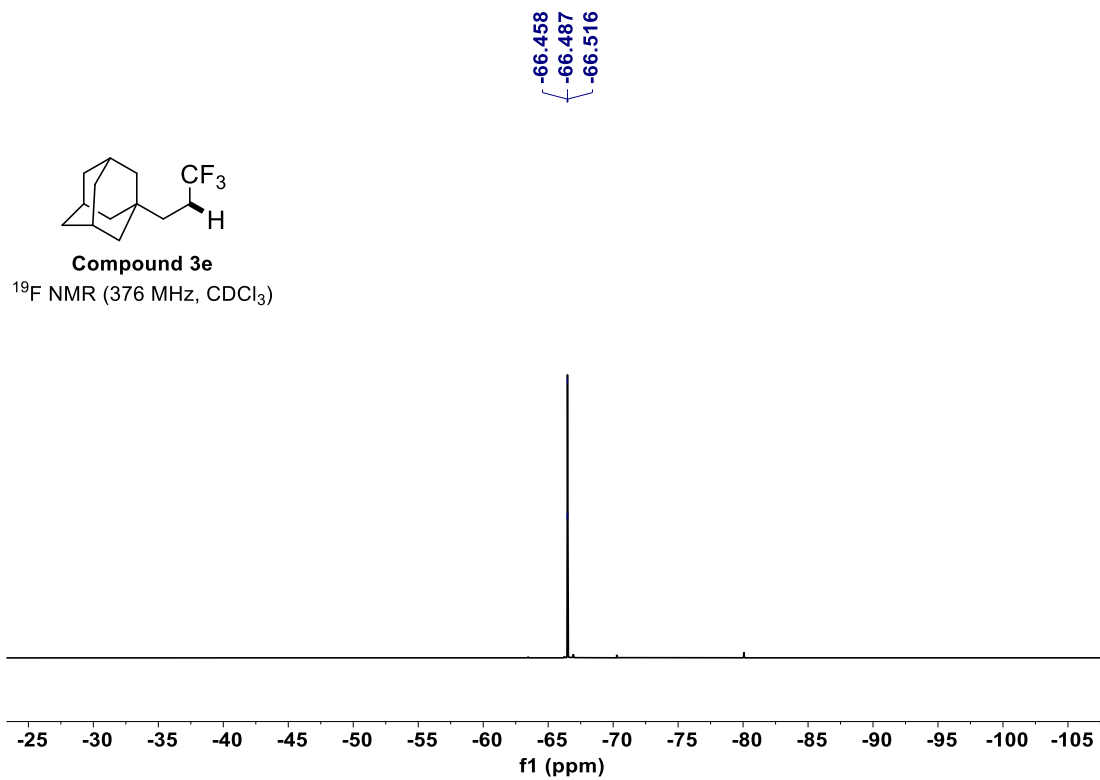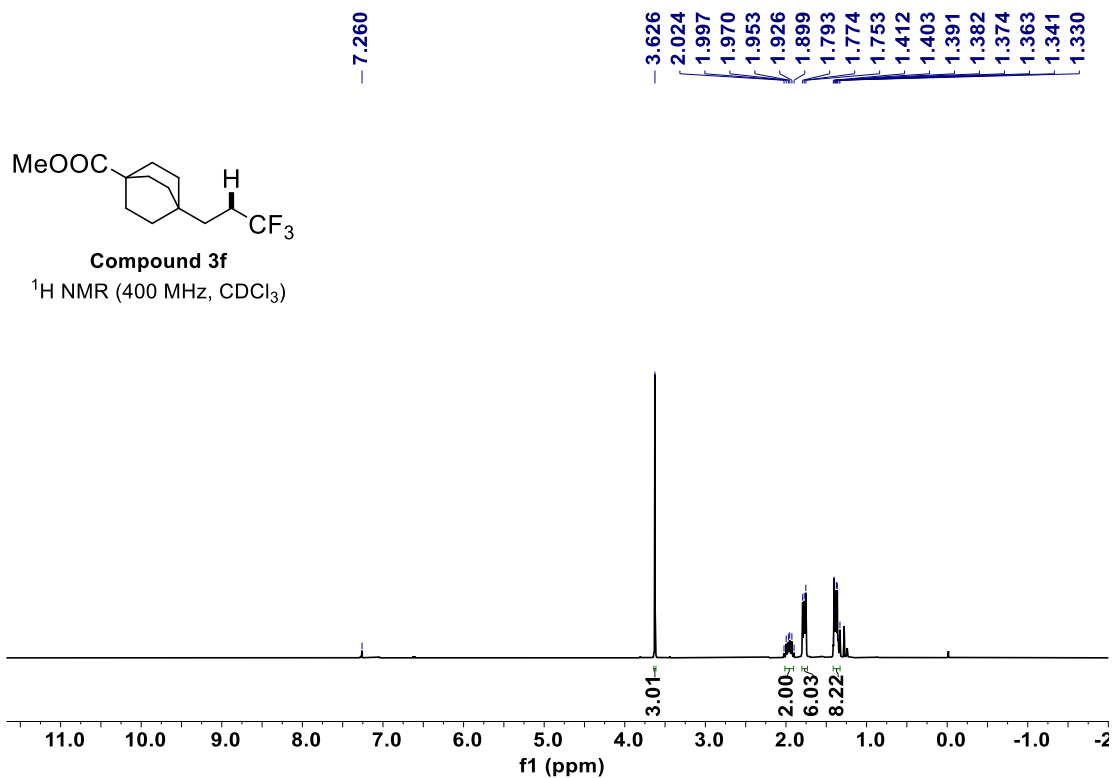

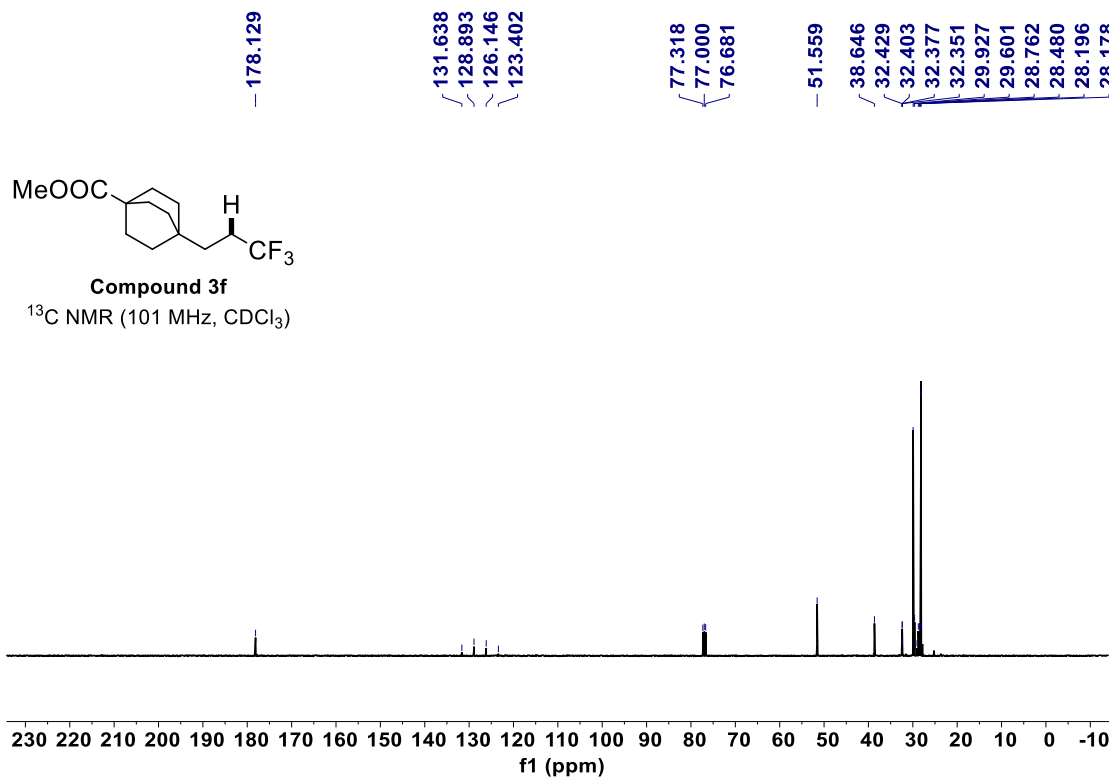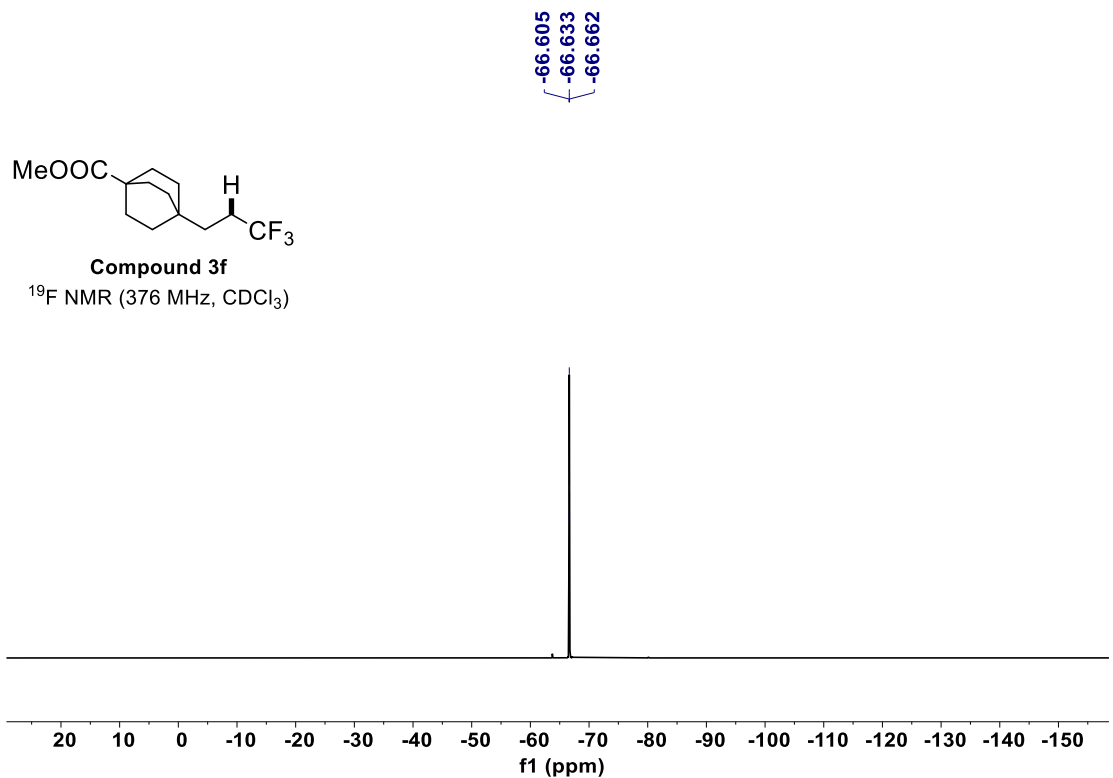



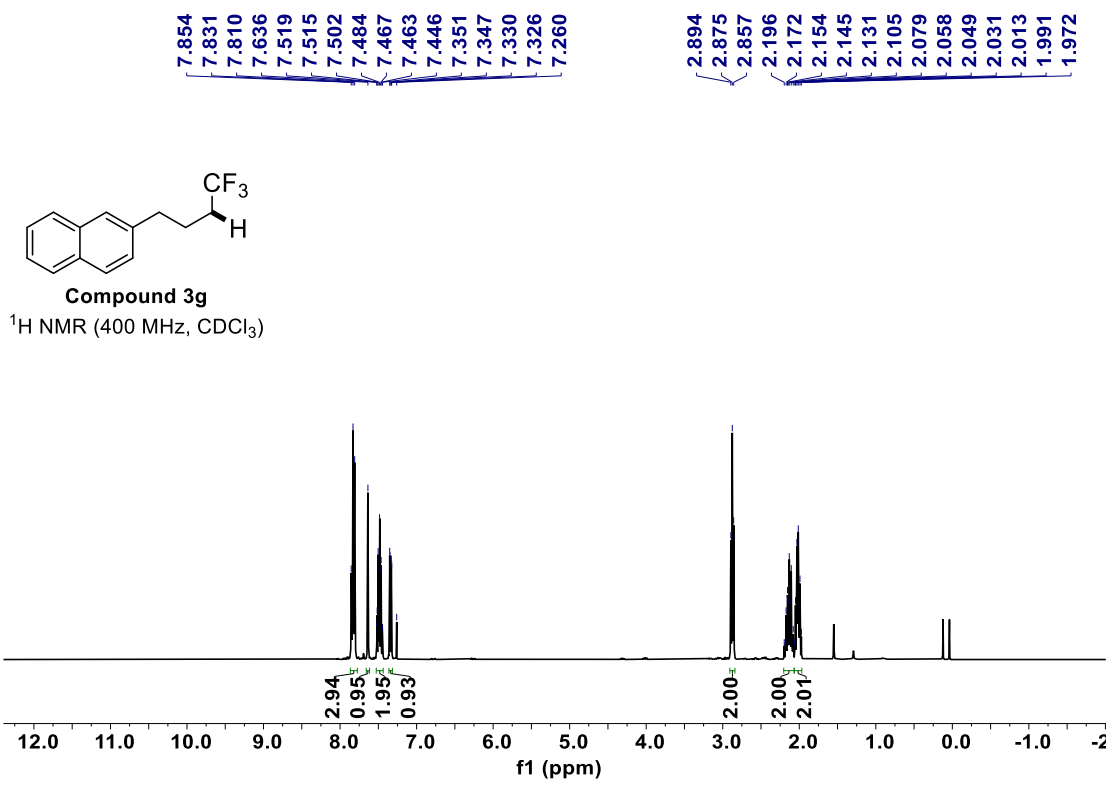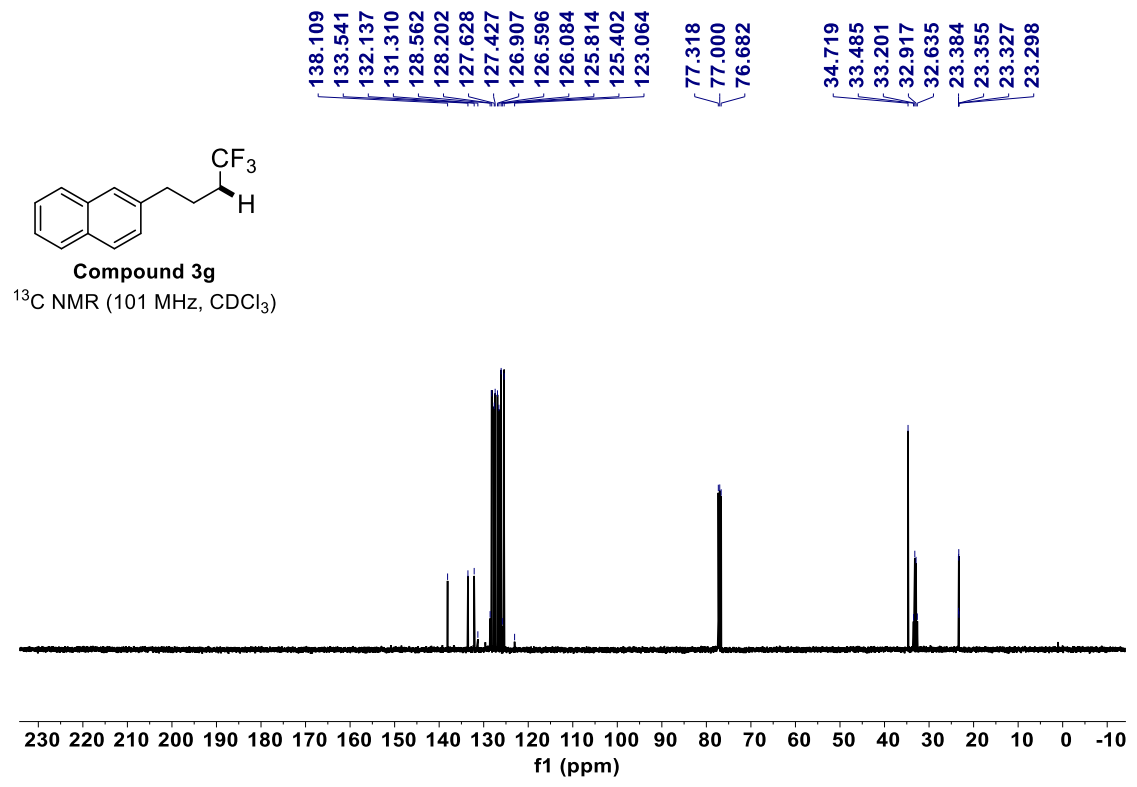

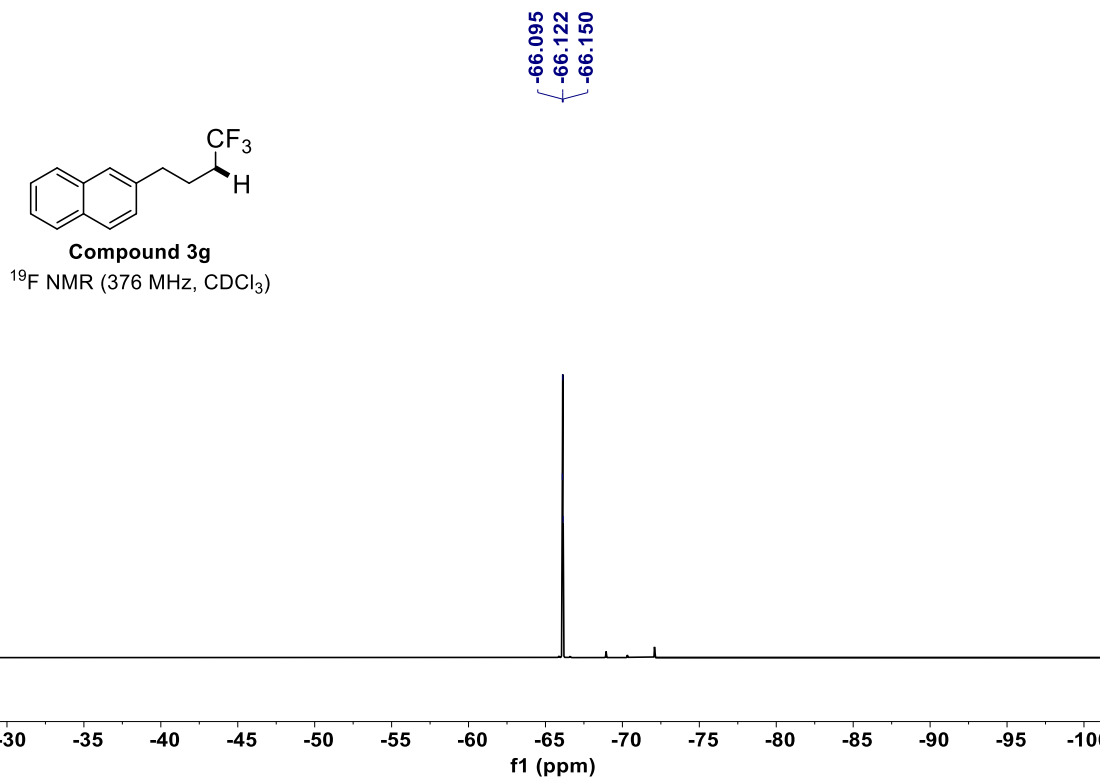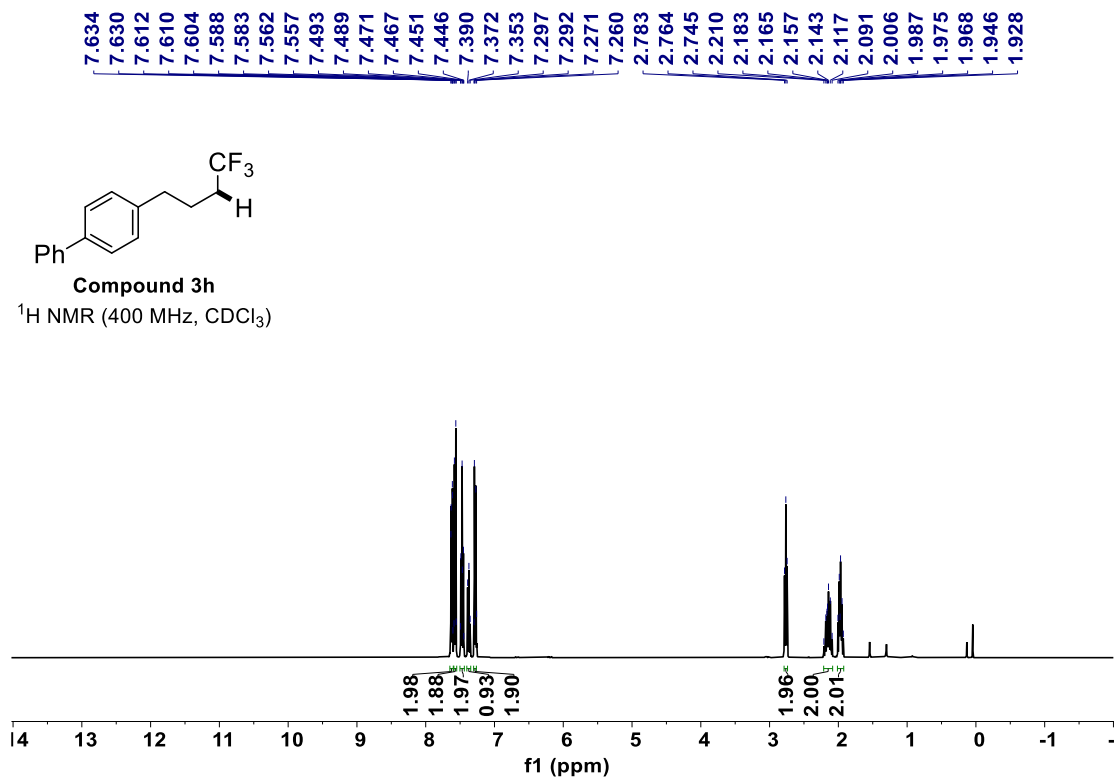

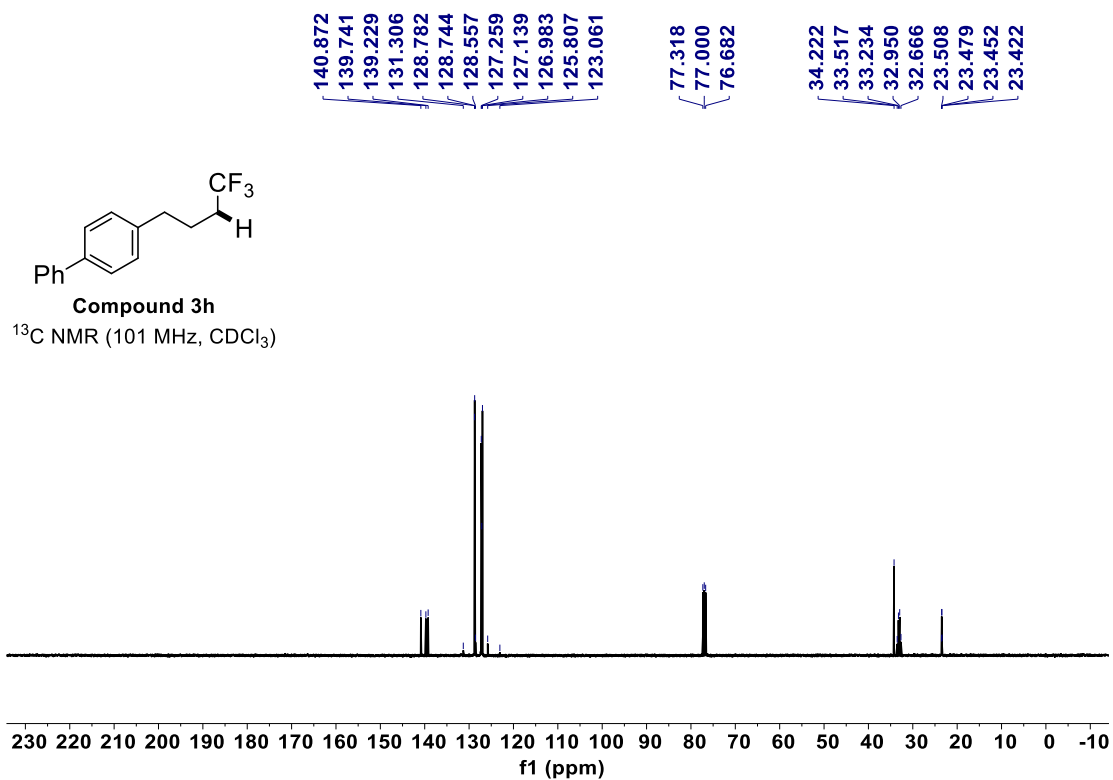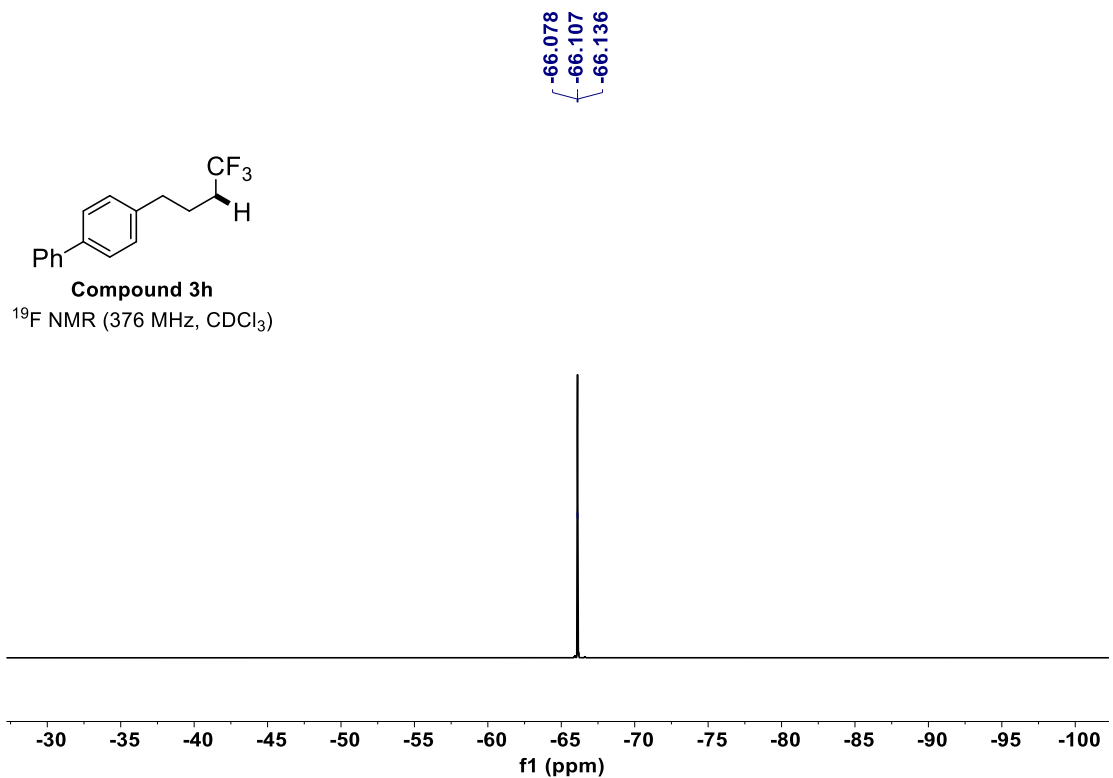

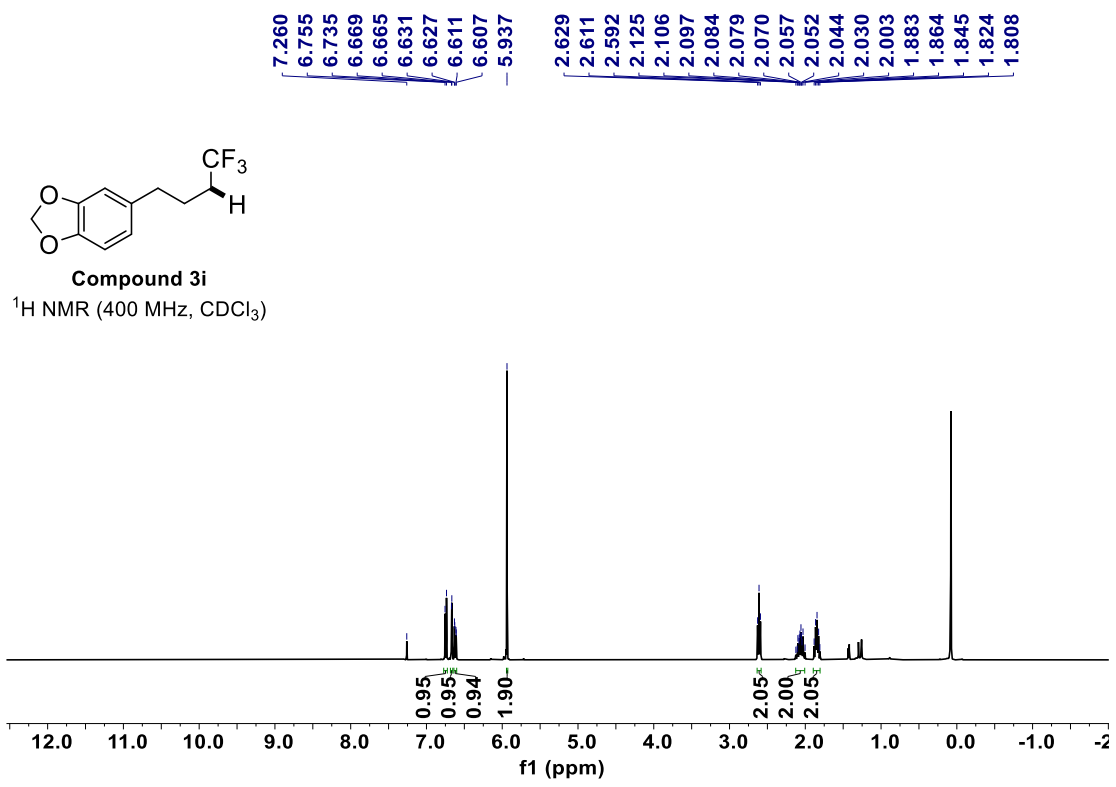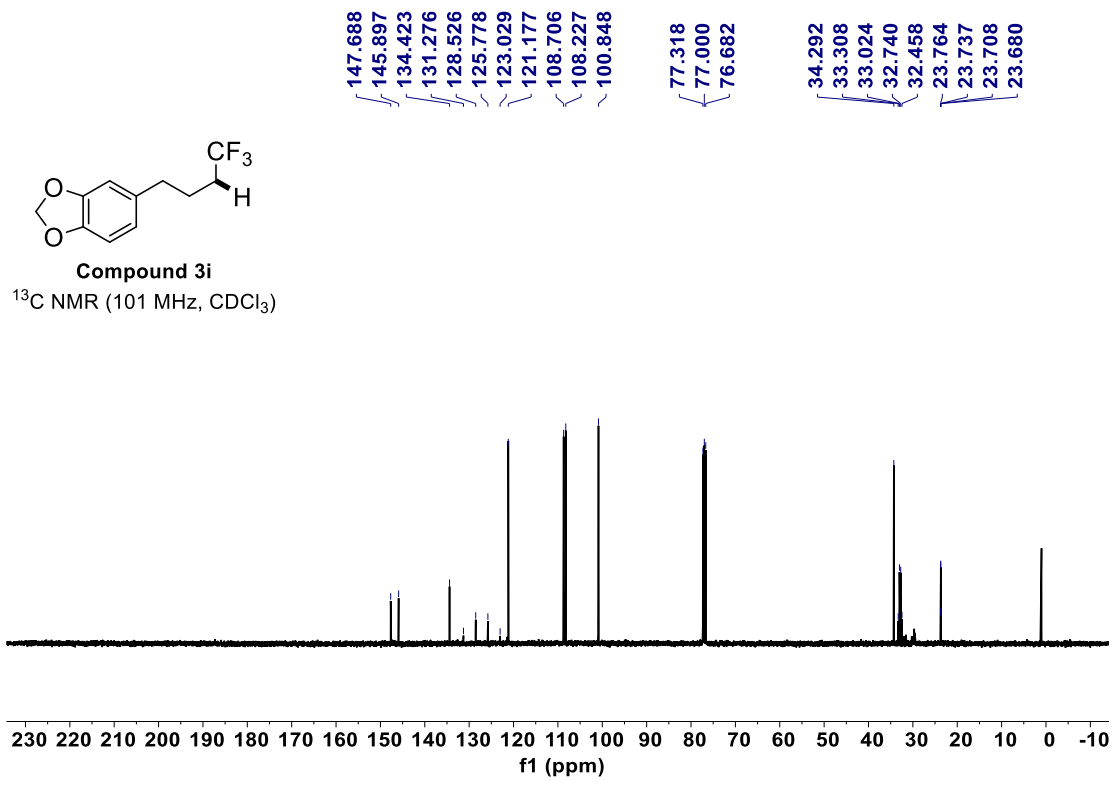

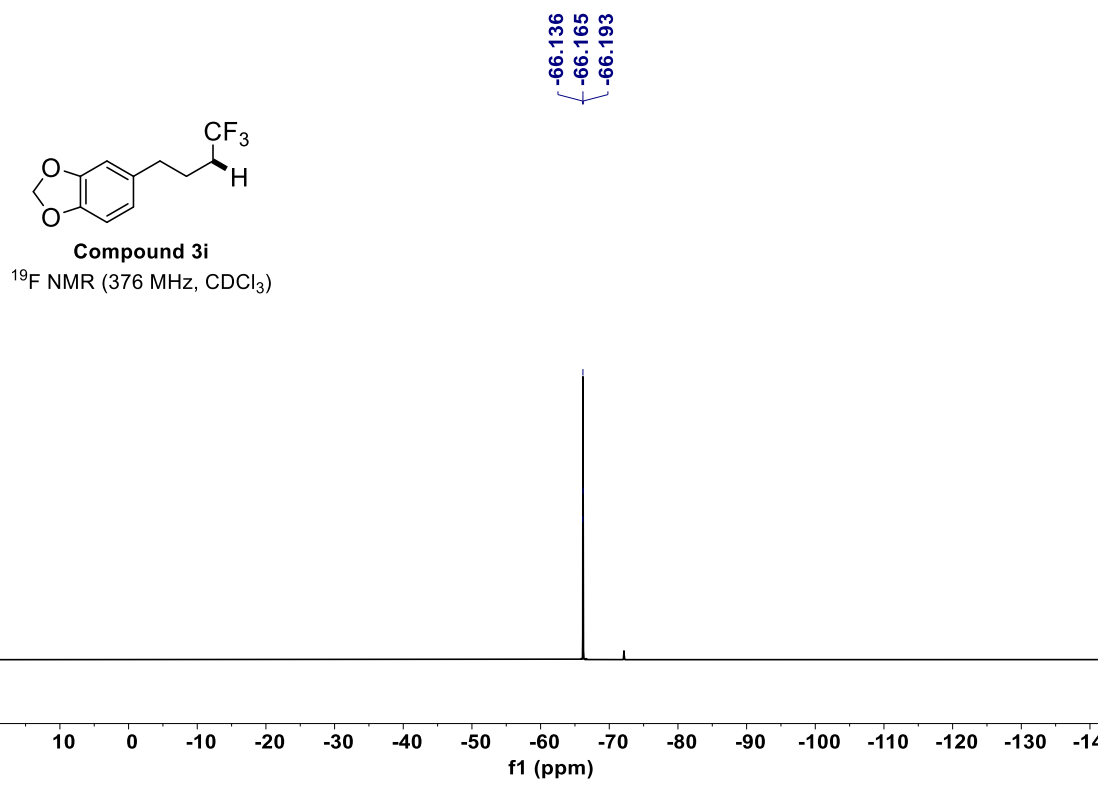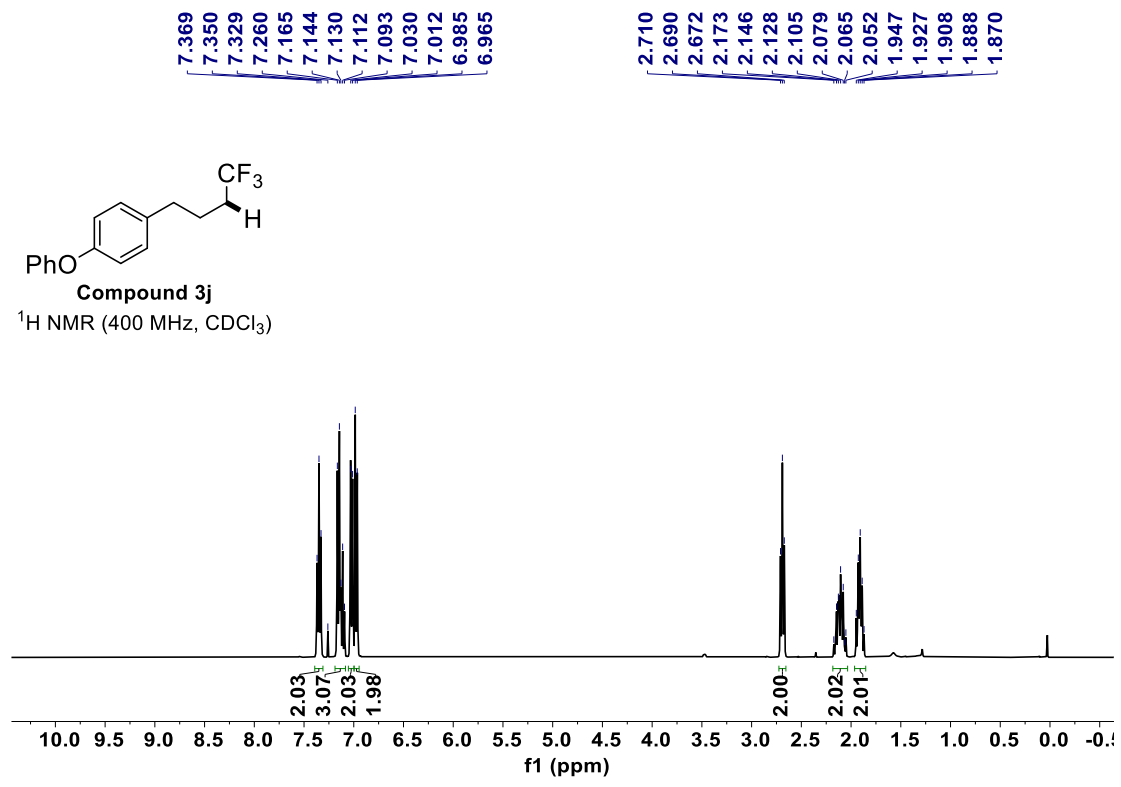

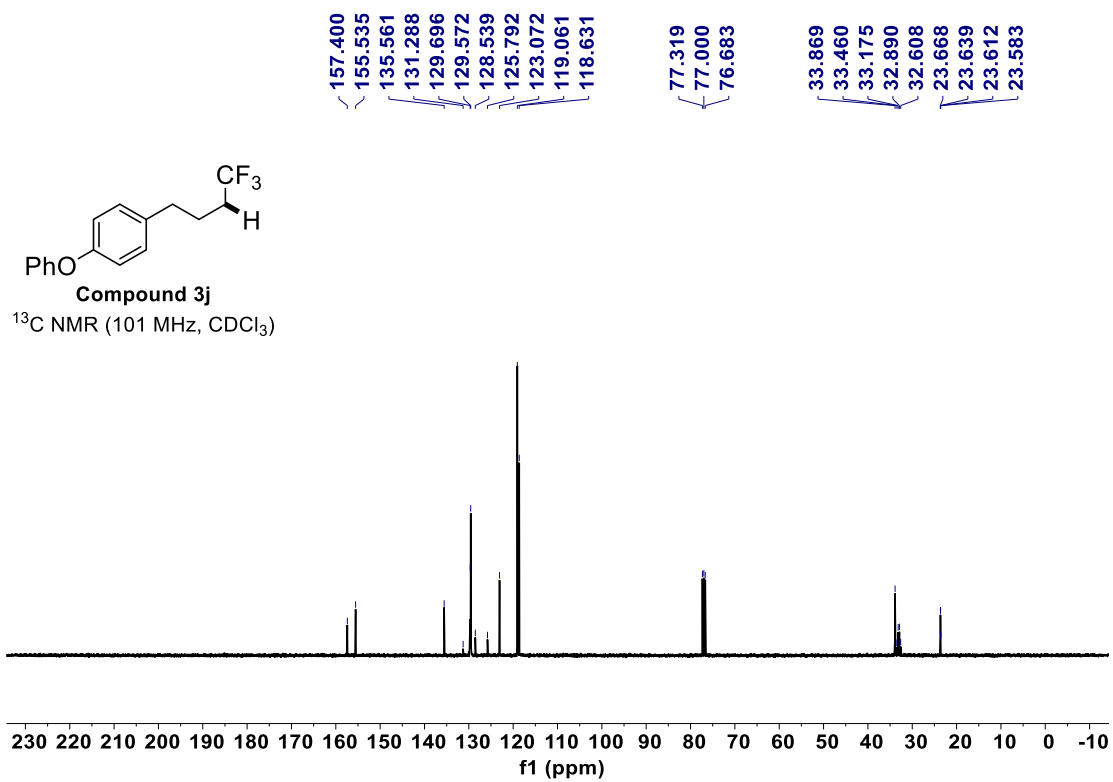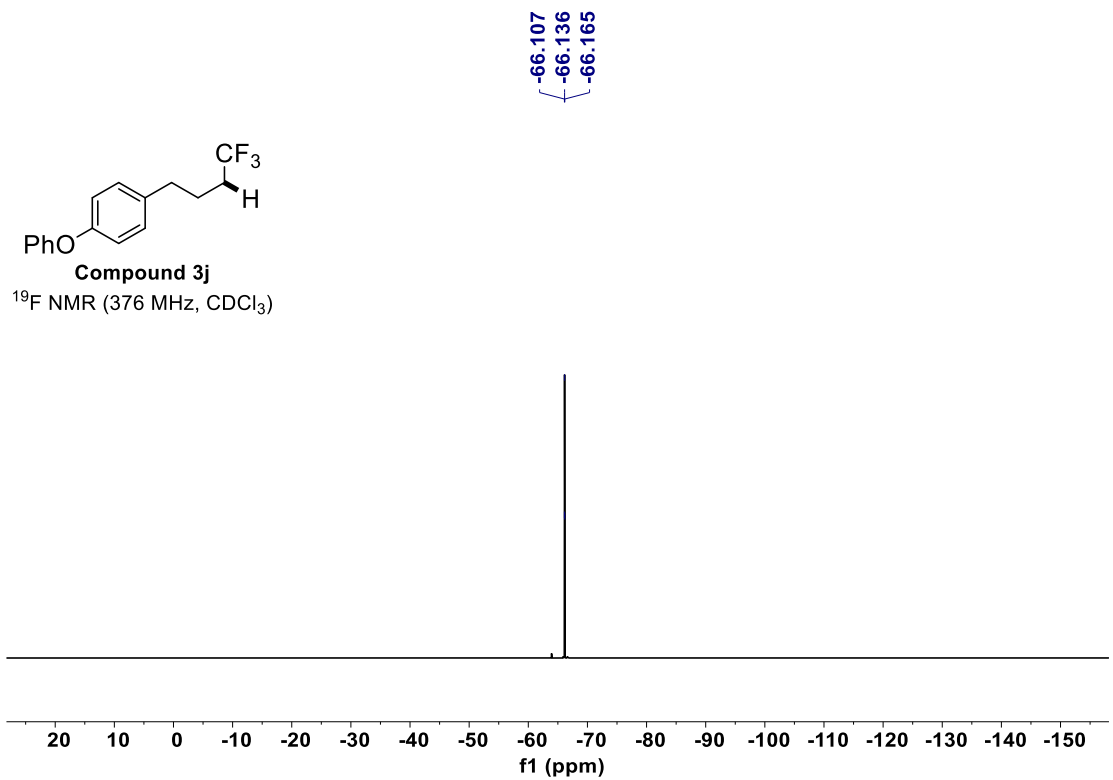

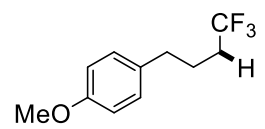

**Compound 3k**

<sup>1</sup>H NMR (400 MHz, CDCl<sub>3</sub>)

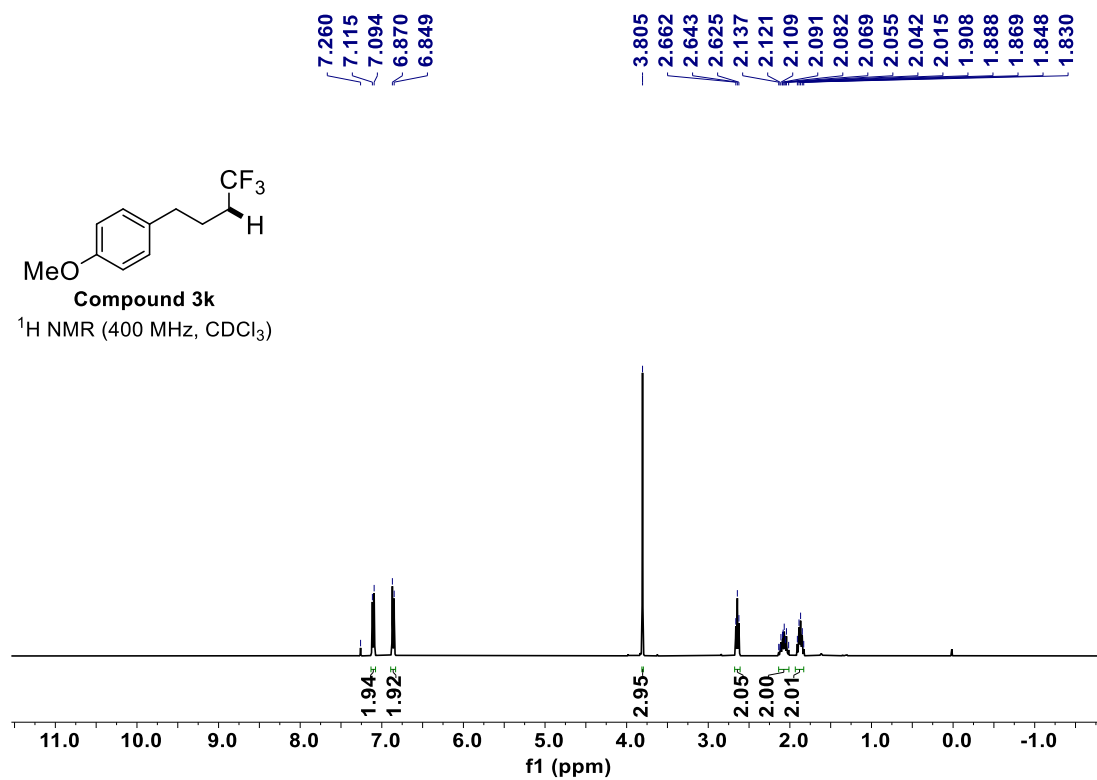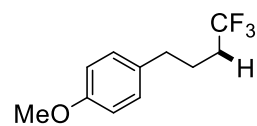

**Compound 3k**

<sup>13</sup>C NMR (101 MHz, CDCl<sub>3</sub>)

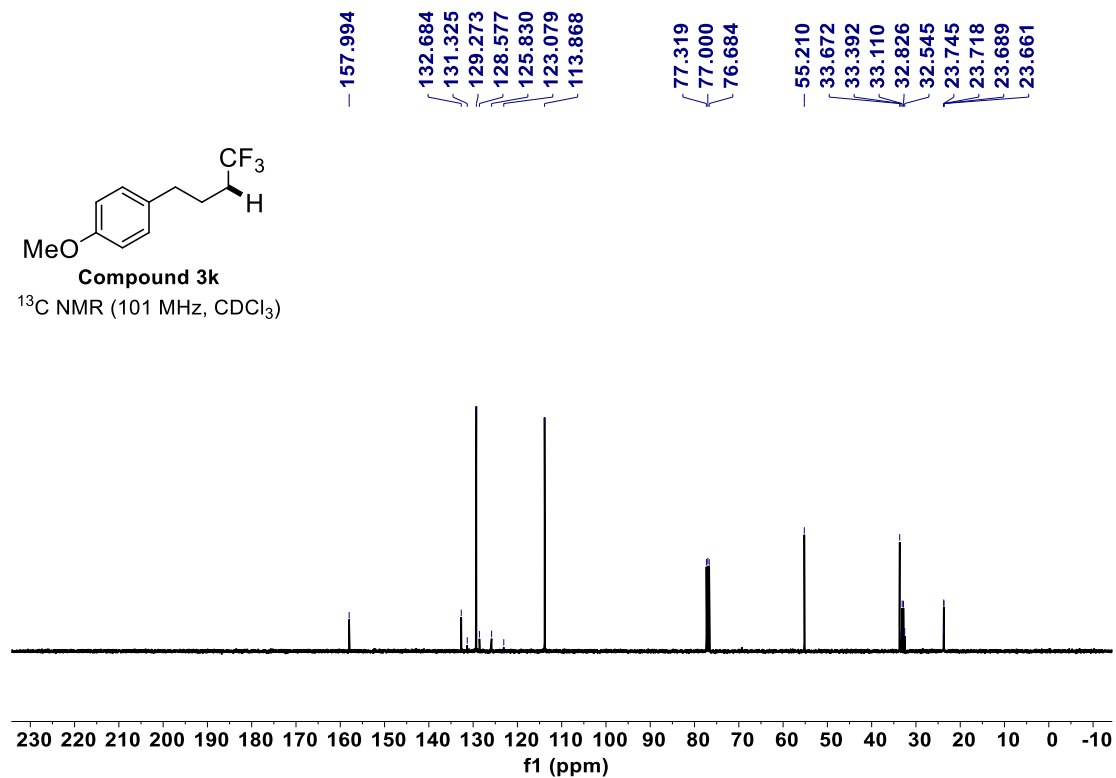

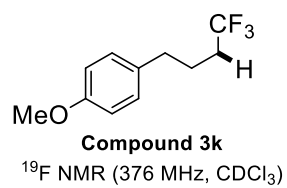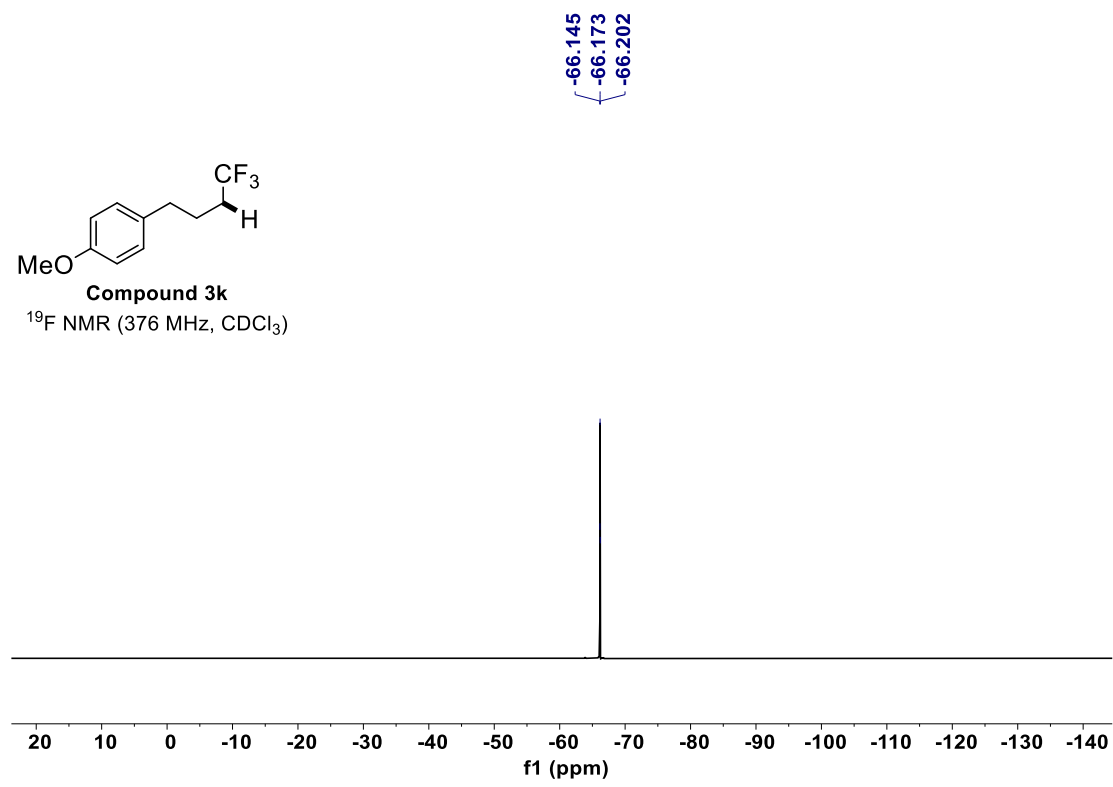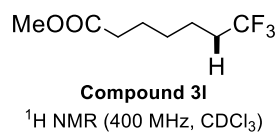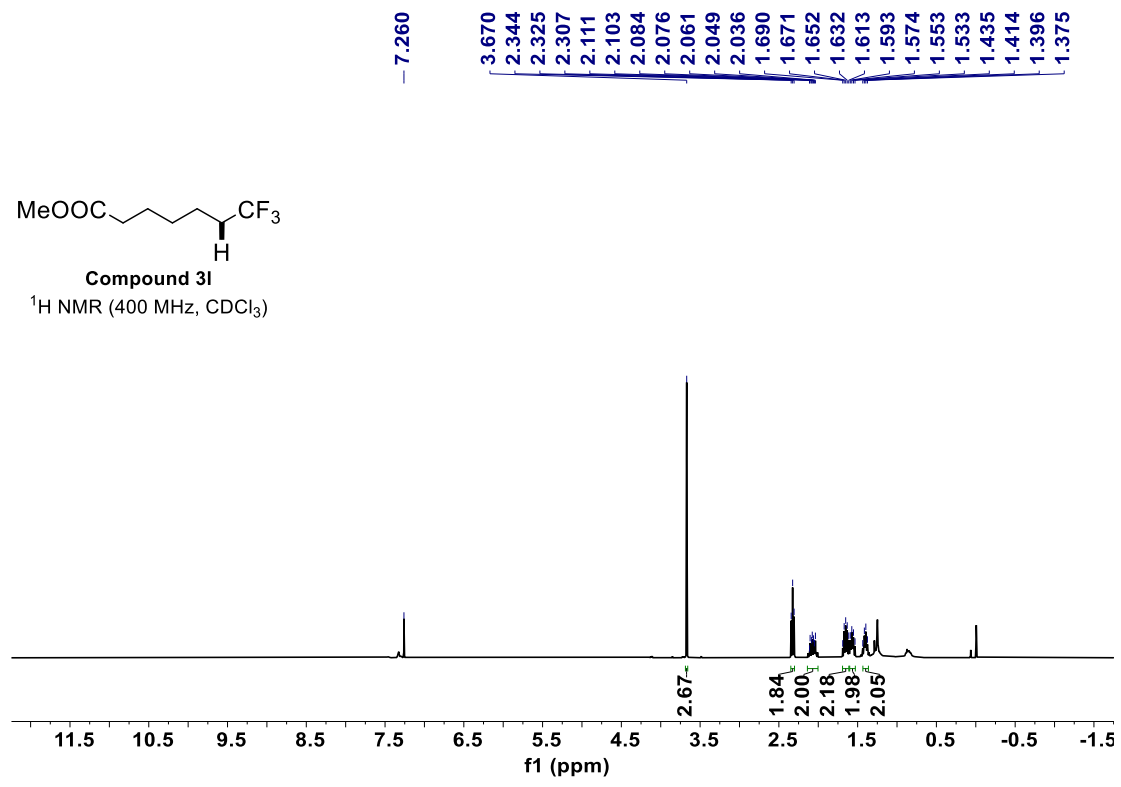



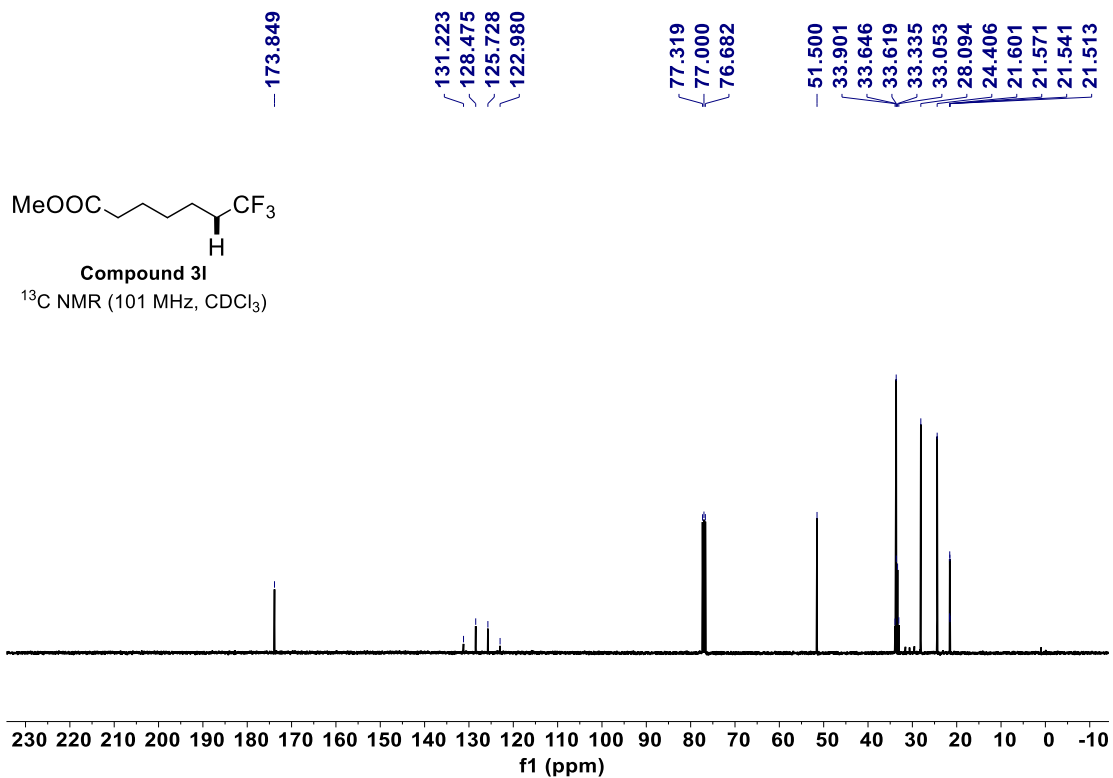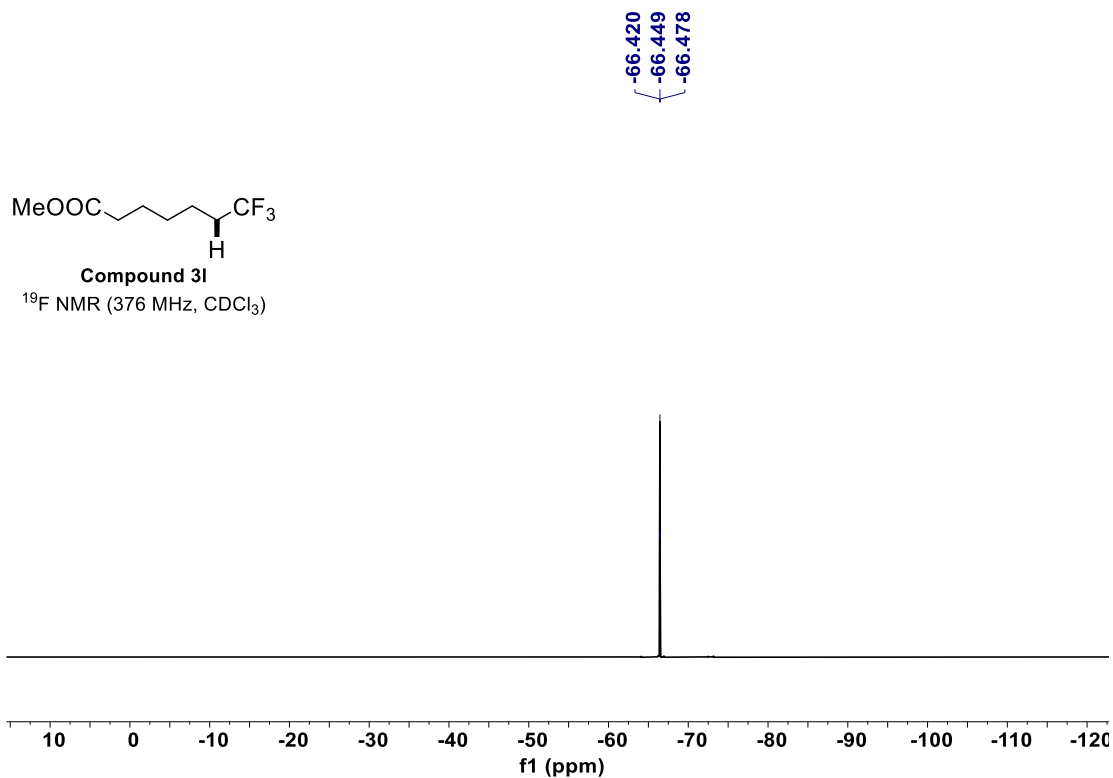

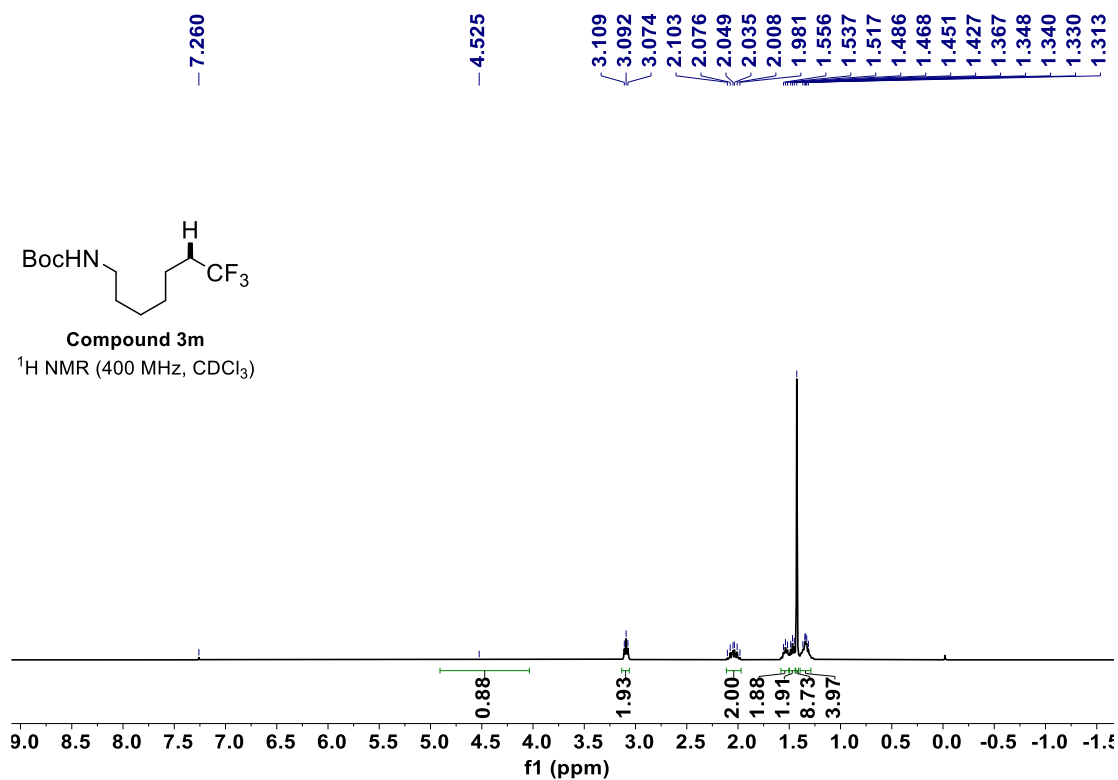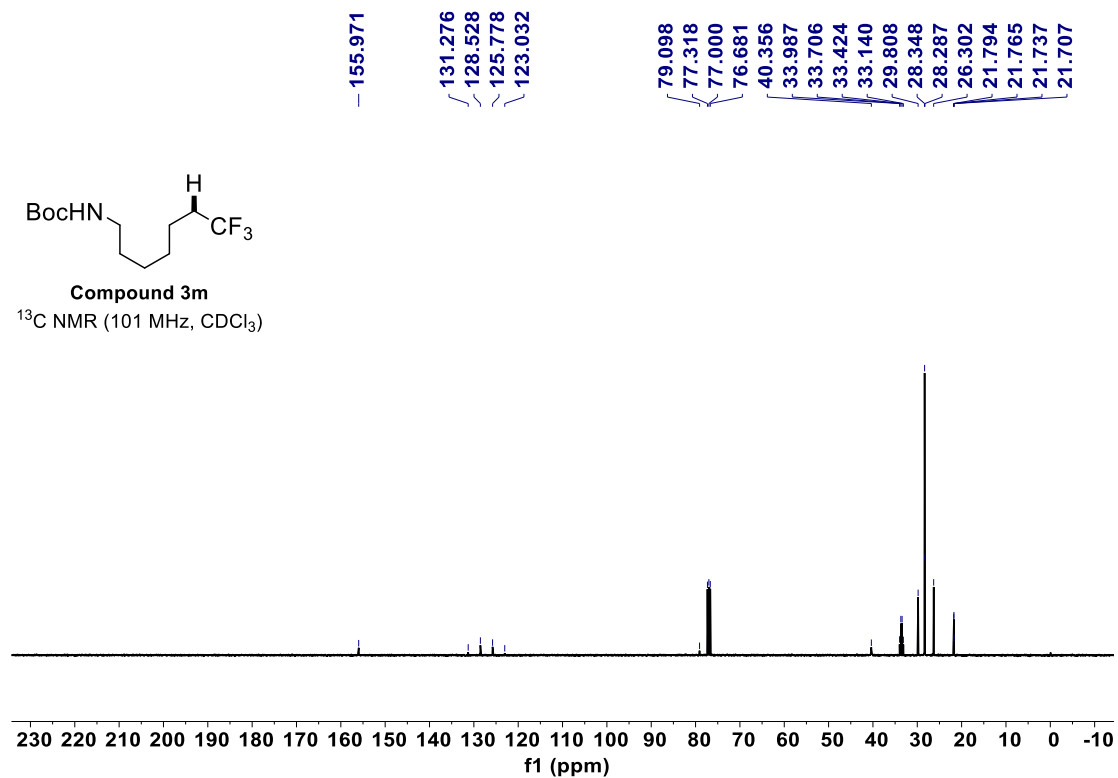

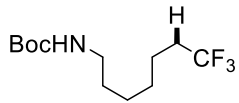

**Compound 3m**  
<sup>19</sup>F NMR (376 MHz, CDCl<sub>3</sub>)

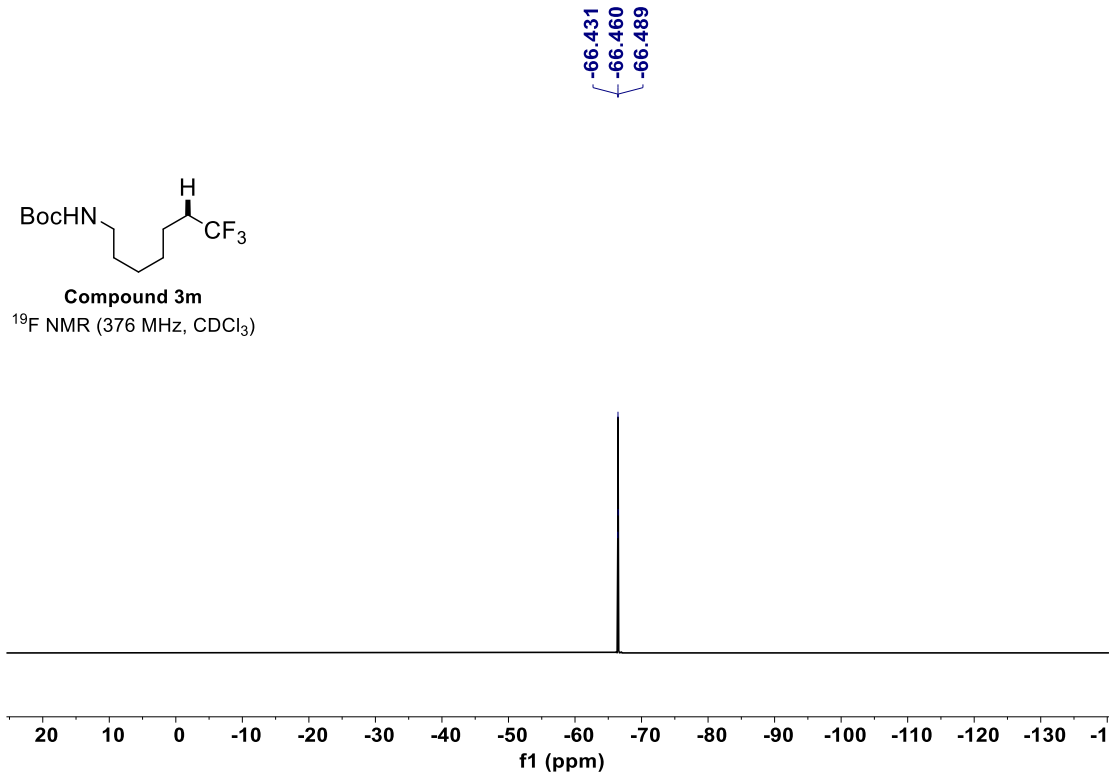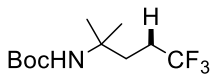

**Compound 3n**  
<sup>1</sup>H NMR (400 MHz, CDCl<sub>3</sub>)

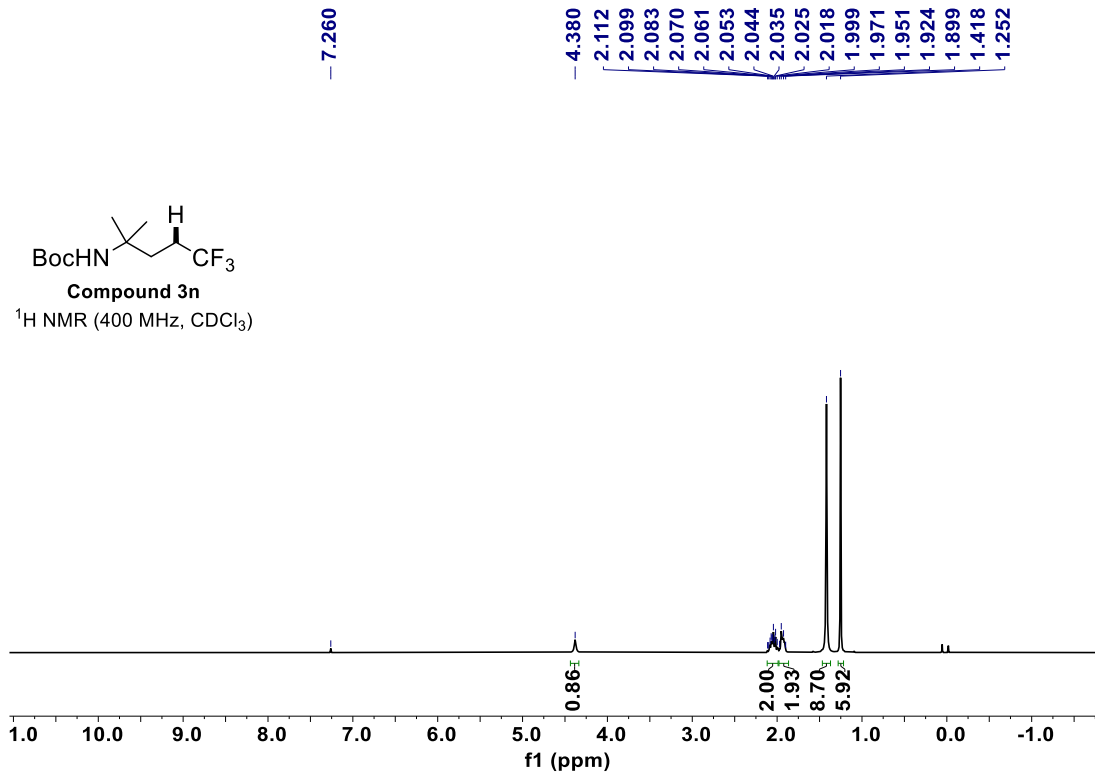

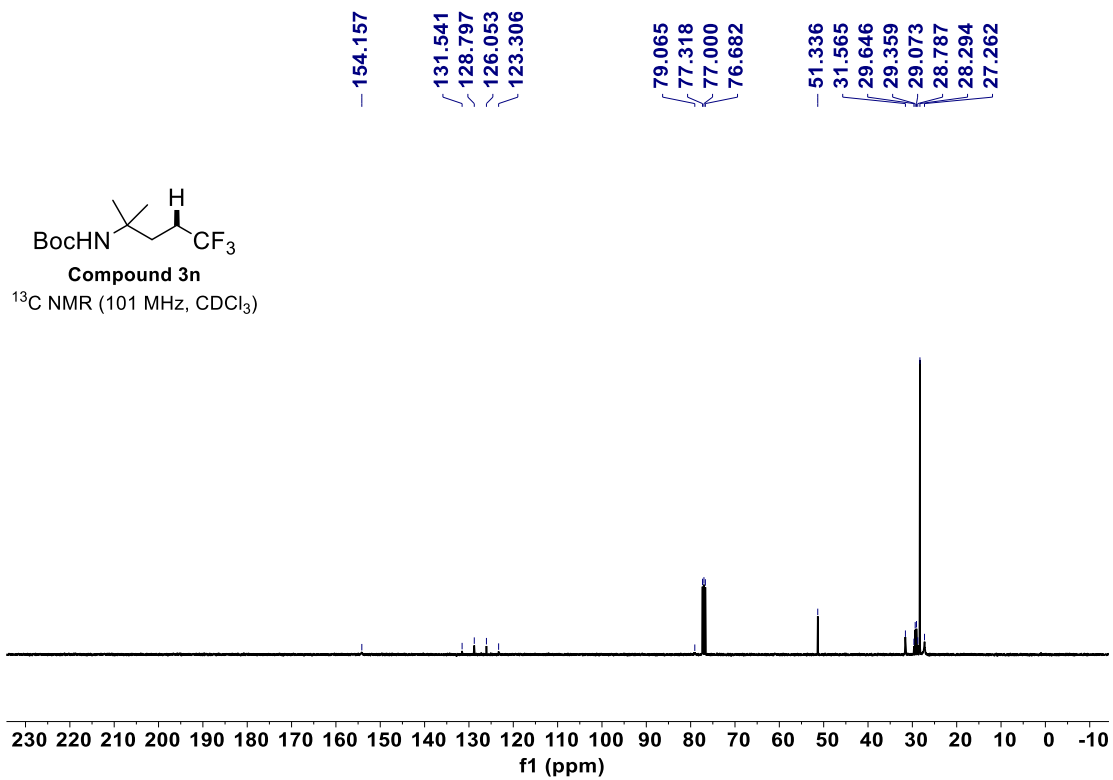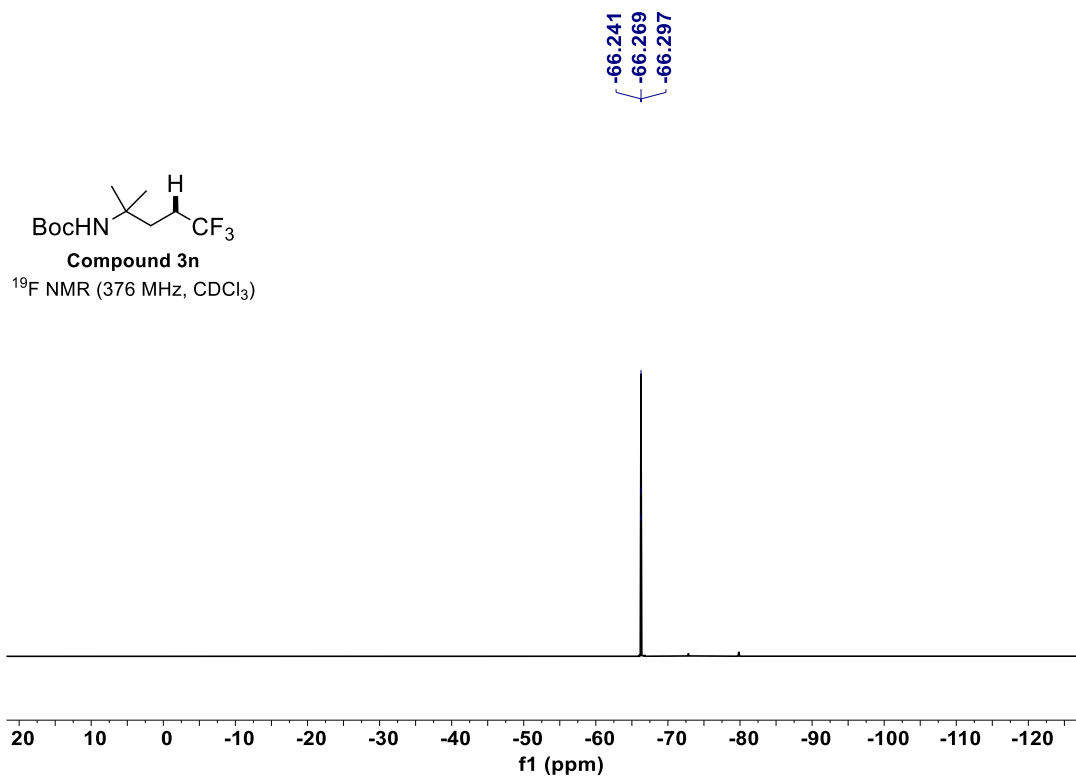

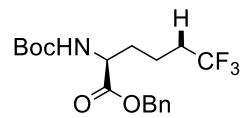

**Compound 3o**

<sup>1</sup>H NMR (400 MHz, CDCl<sub>3</sub>)

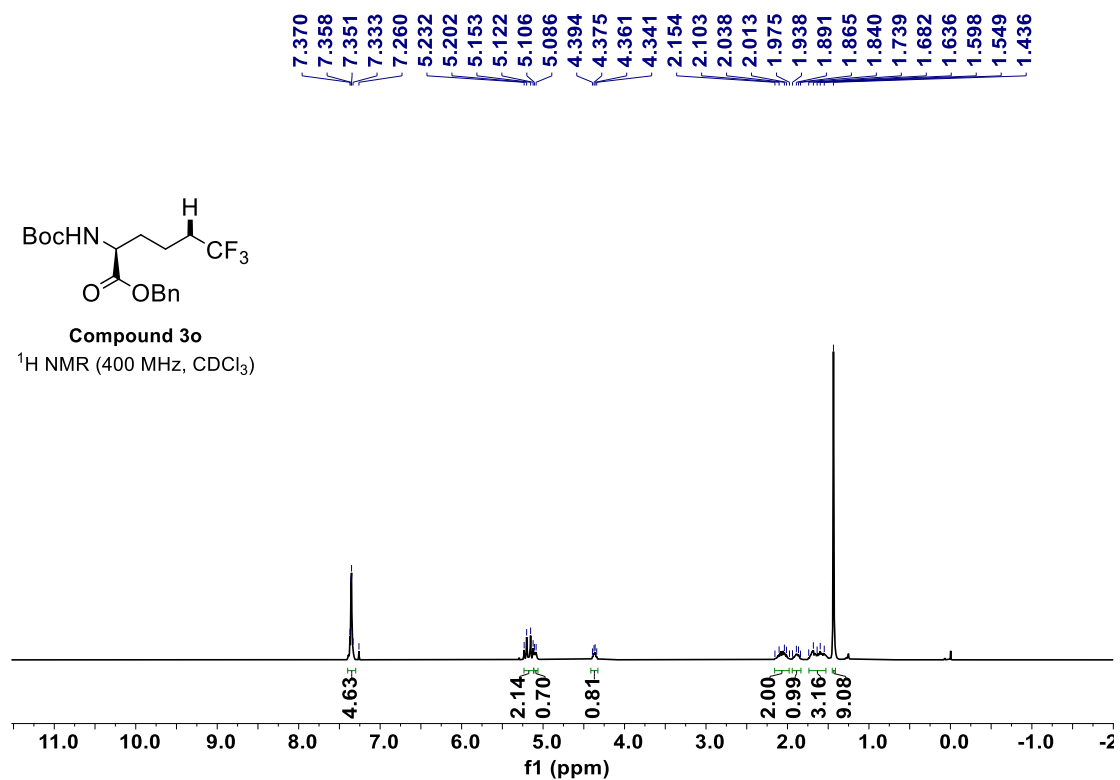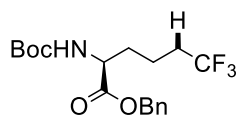

**Compound 3o**

<sup>13</sup>C NMR (101 MHz, CDCl<sub>3</sub>)

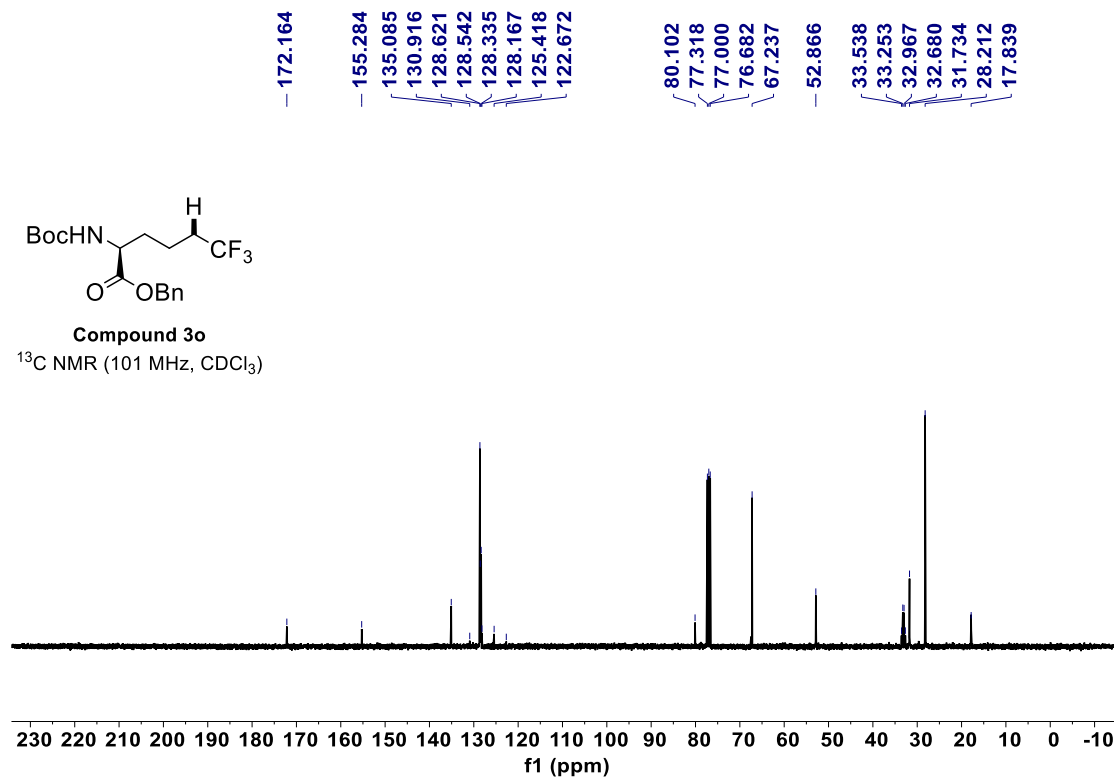

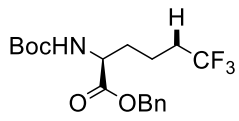

**Compound 3o**

<sup>19</sup>F NMR (376 MHz, CDCl<sub>3</sub>)

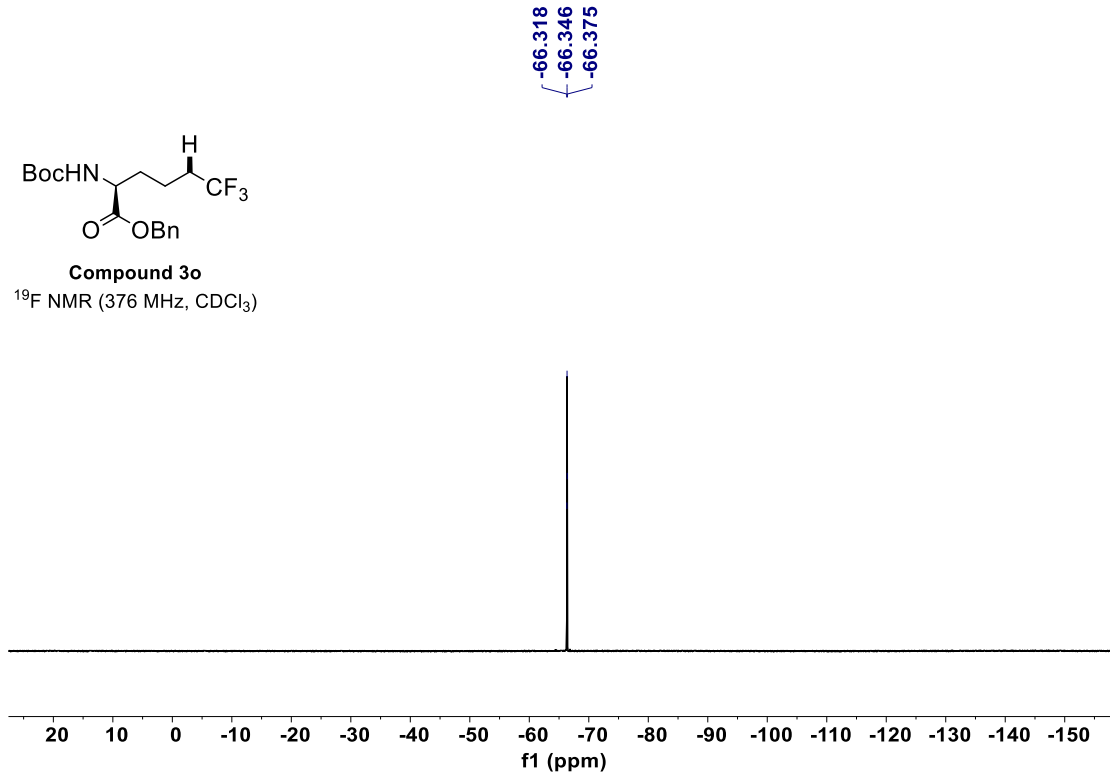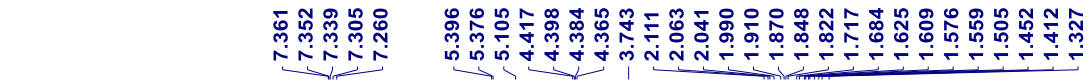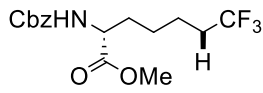

**Compound 3p**

<sup>1</sup>H NMR (400 MHz, CDCl<sub>3</sub>)

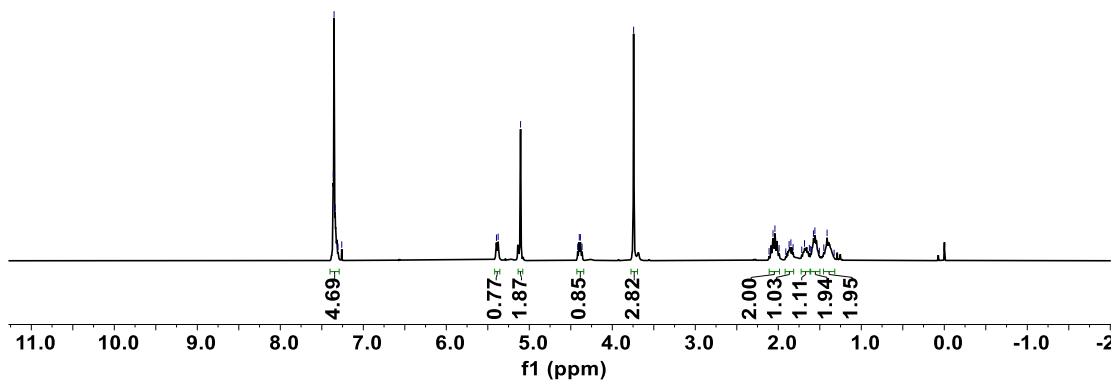

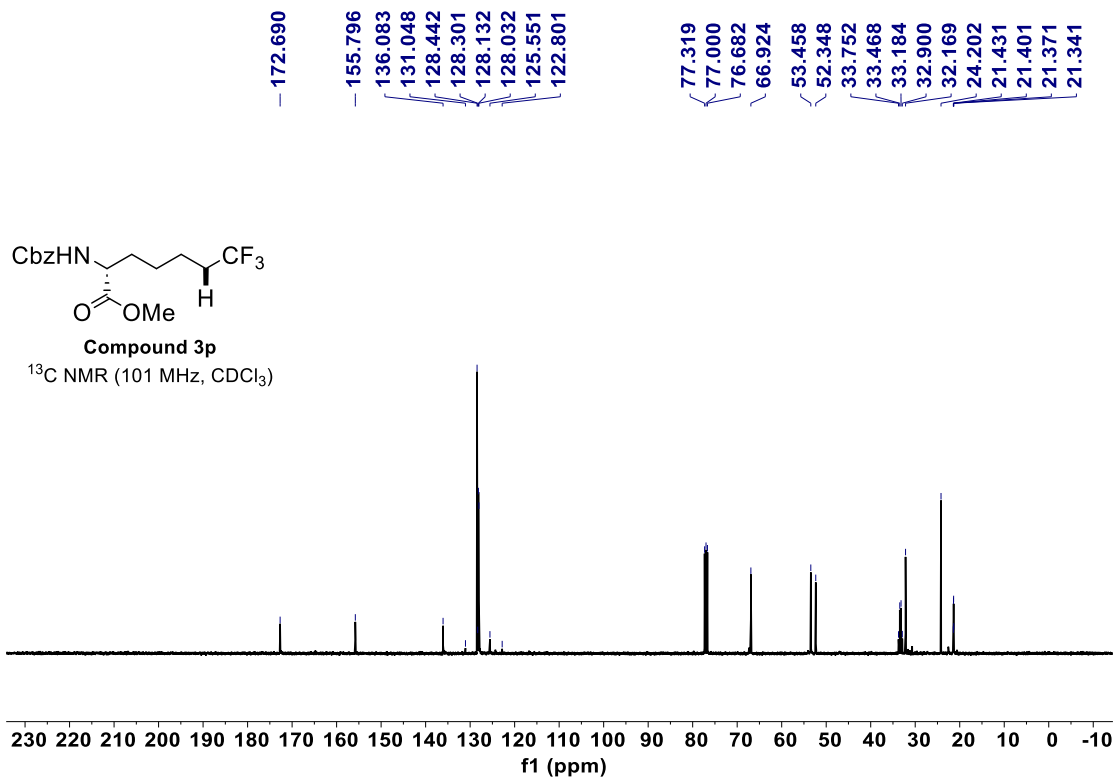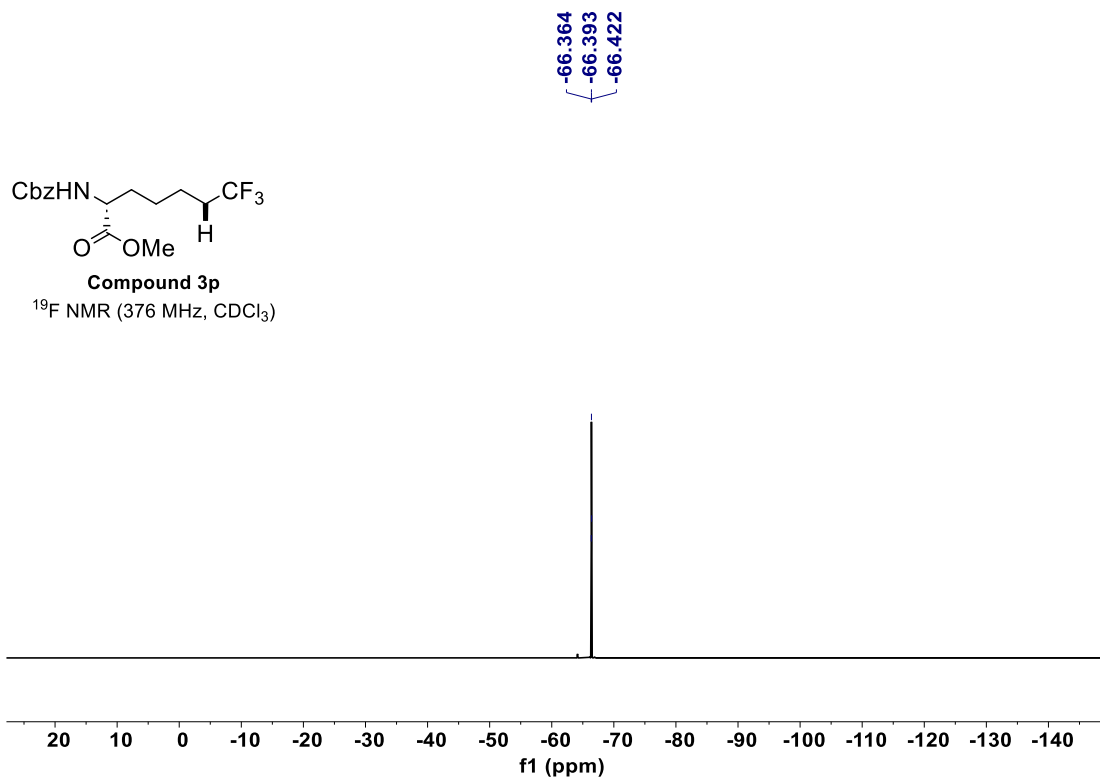

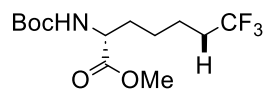

**Compound 3q**

<sup>1</sup>H NMR (400 MHz, CDCl<sub>3</sub>)

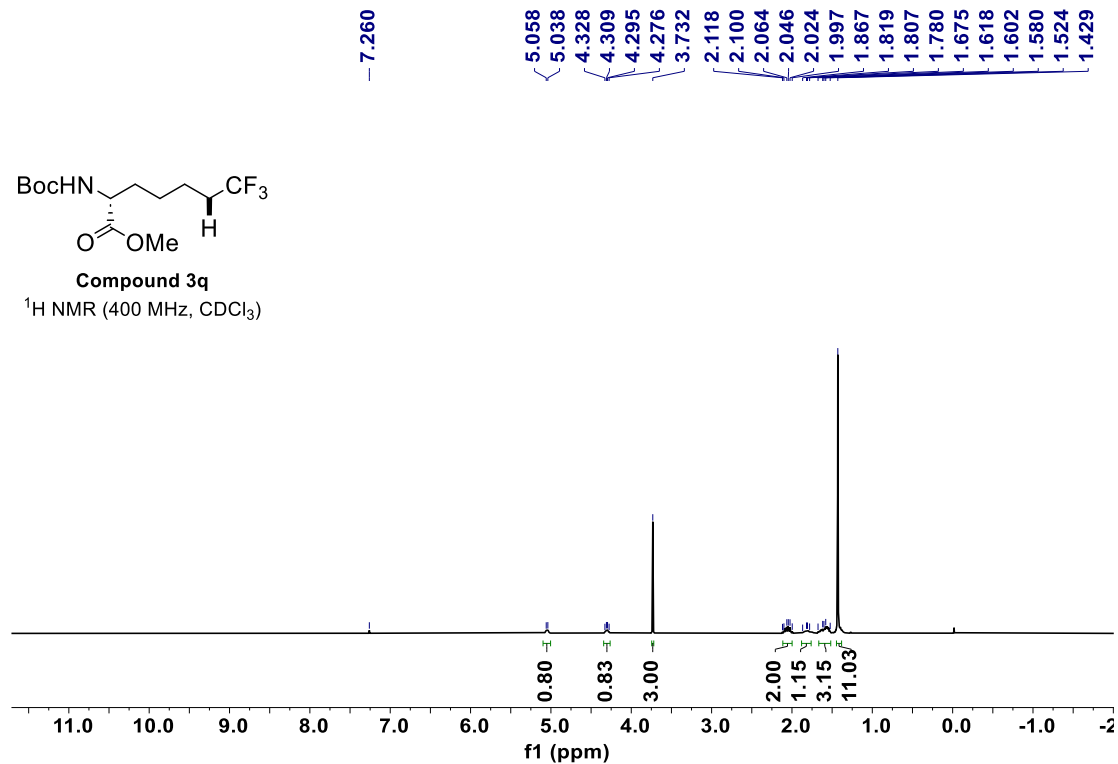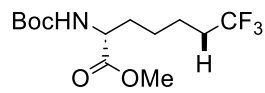

**Compound 3q**

<sup>13</sup>C NMR (101 MHz, CDCl<sub>3</sub>)

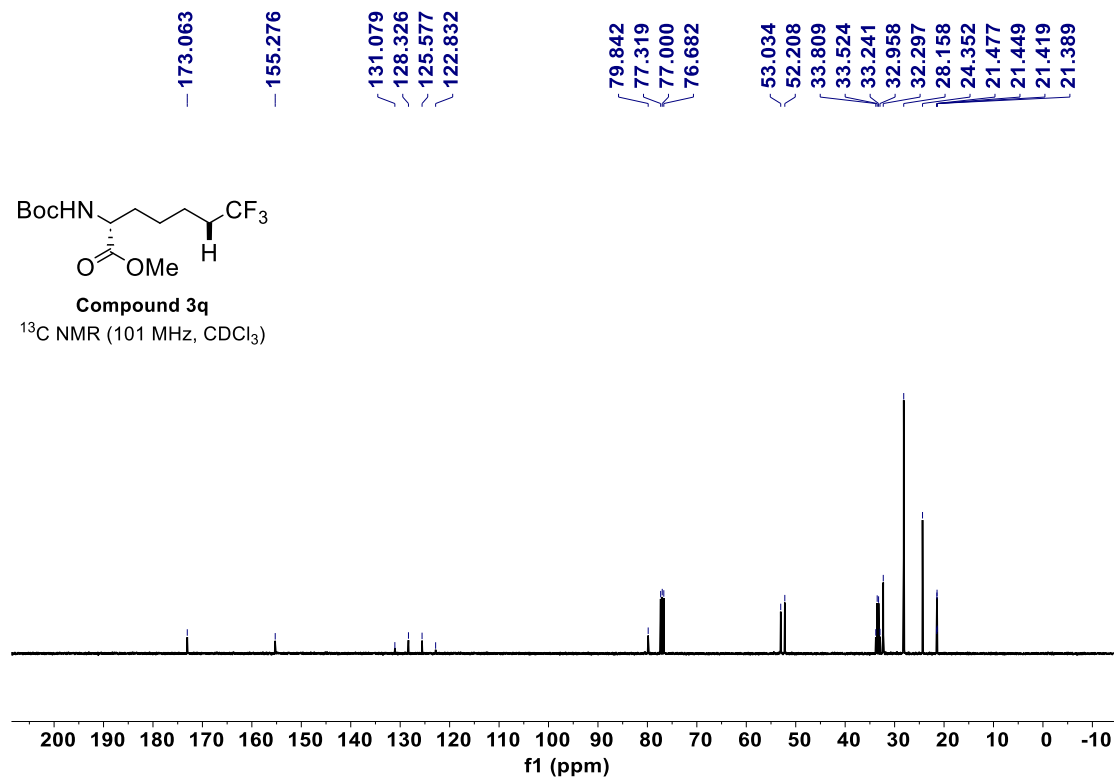



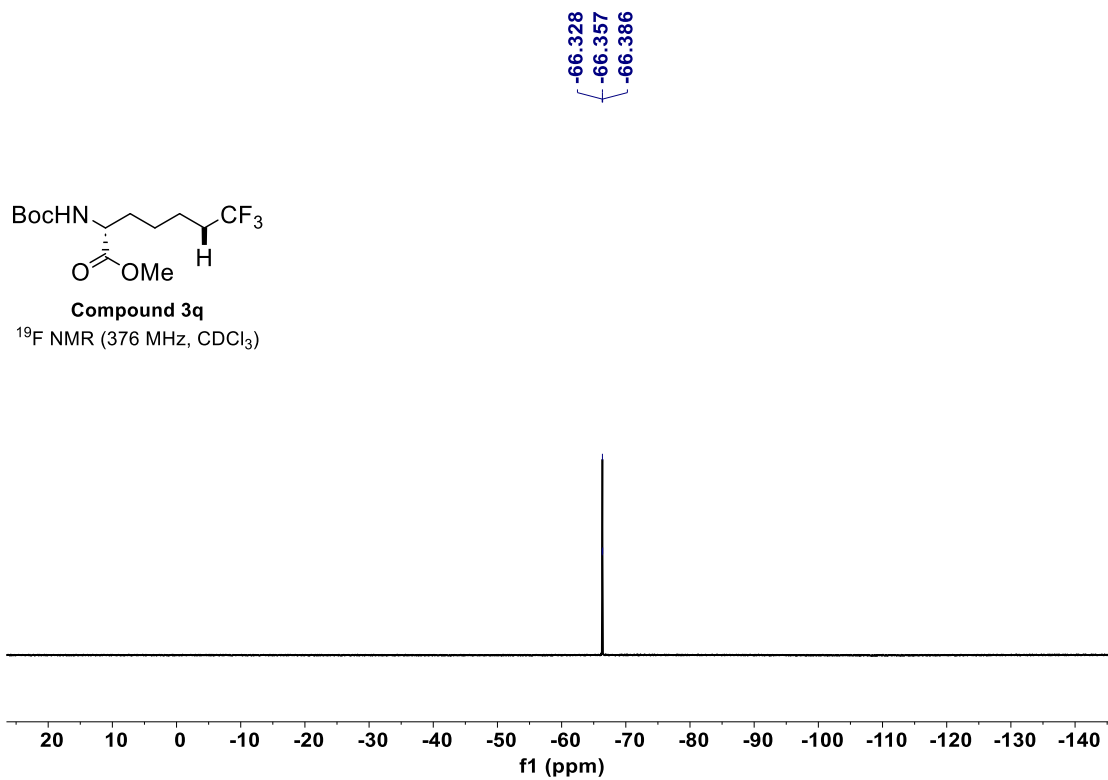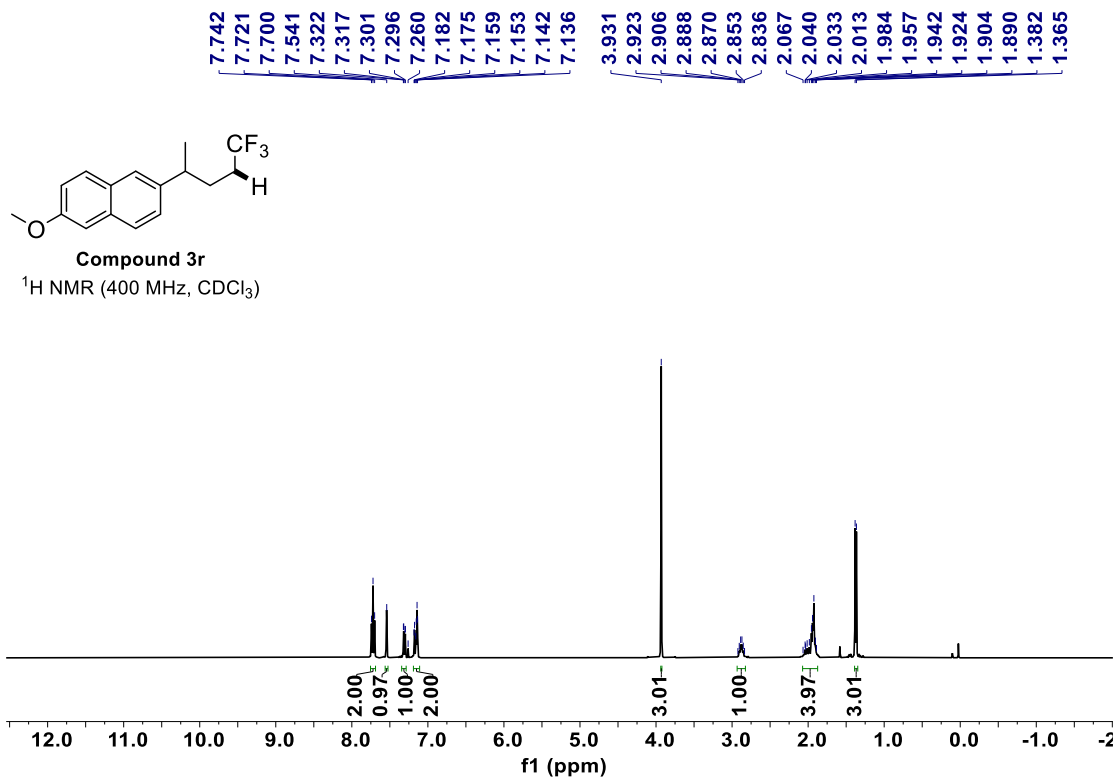

157.357  
140.584  
133.368  
131.398  
129.015  
128.976  
128.650  
127.249  
125.903  
125.622  
125.212  
123.155  
118.894  
105.541

77.315  
77.000  
76.680

55.276  
39.007  
32.510  
32.226  
31.945  
31.661  
30.007  
29.980  
29.954  
29.927  
22.370

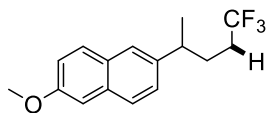

**Compound 3r**  
<sup>13</sup>C NMR (101 MHz, CDCl<sub>3</sub>)

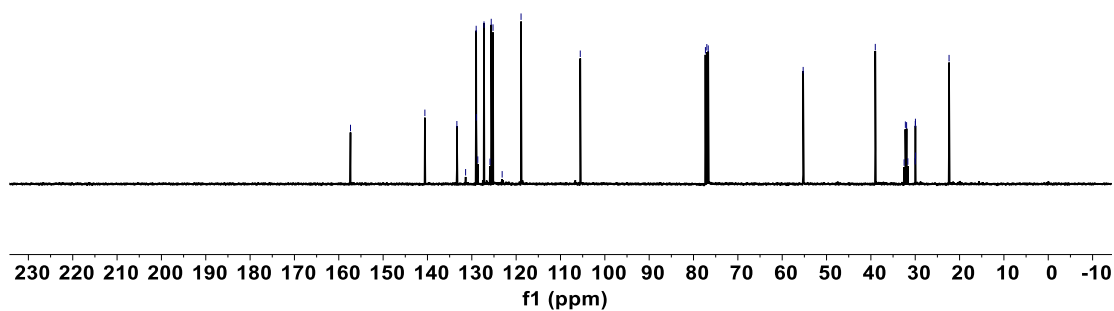

-66.227  
-66.253  
-66.279

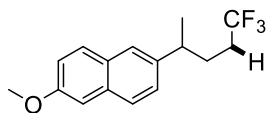

**Compound 3r**  
<sup>19</sup>F NMR (376 MHz, CDCl<sub>3</sub>)

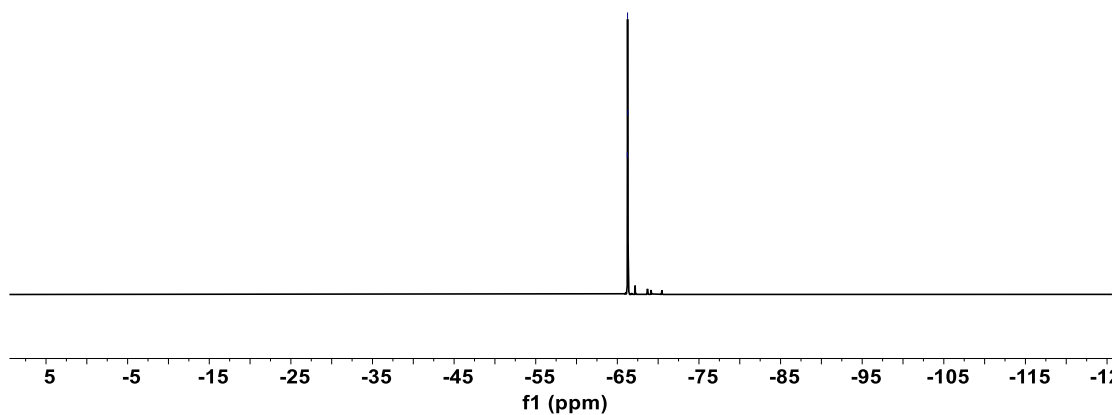

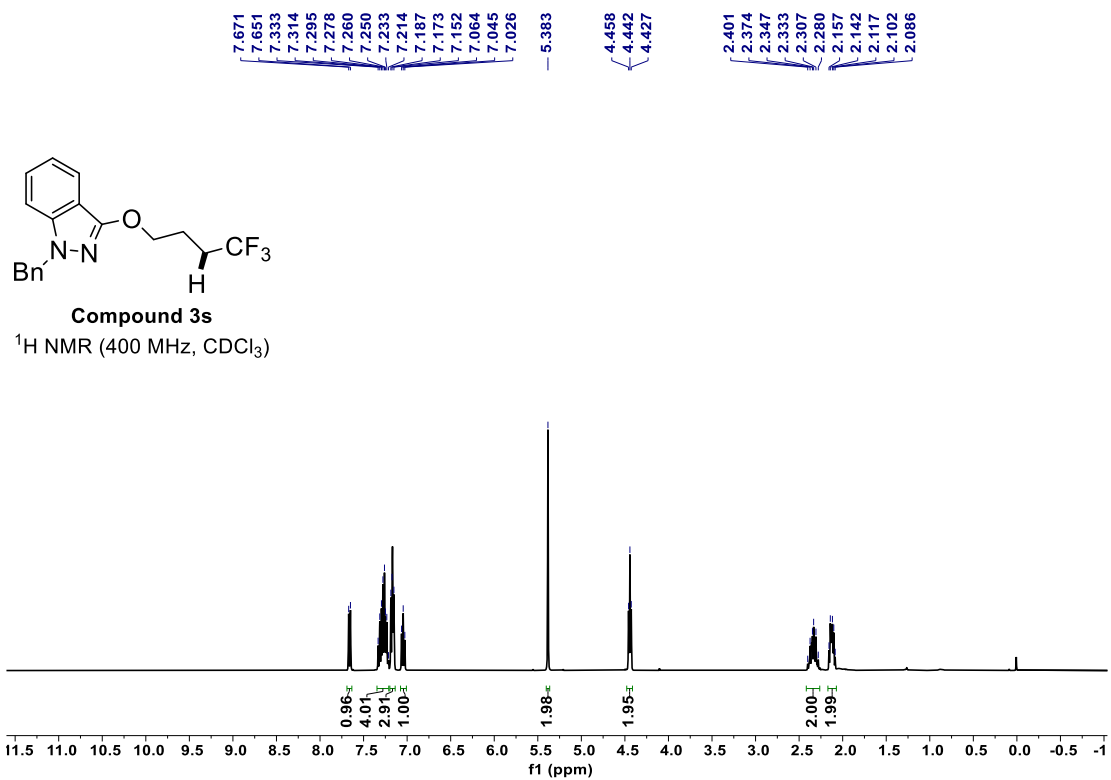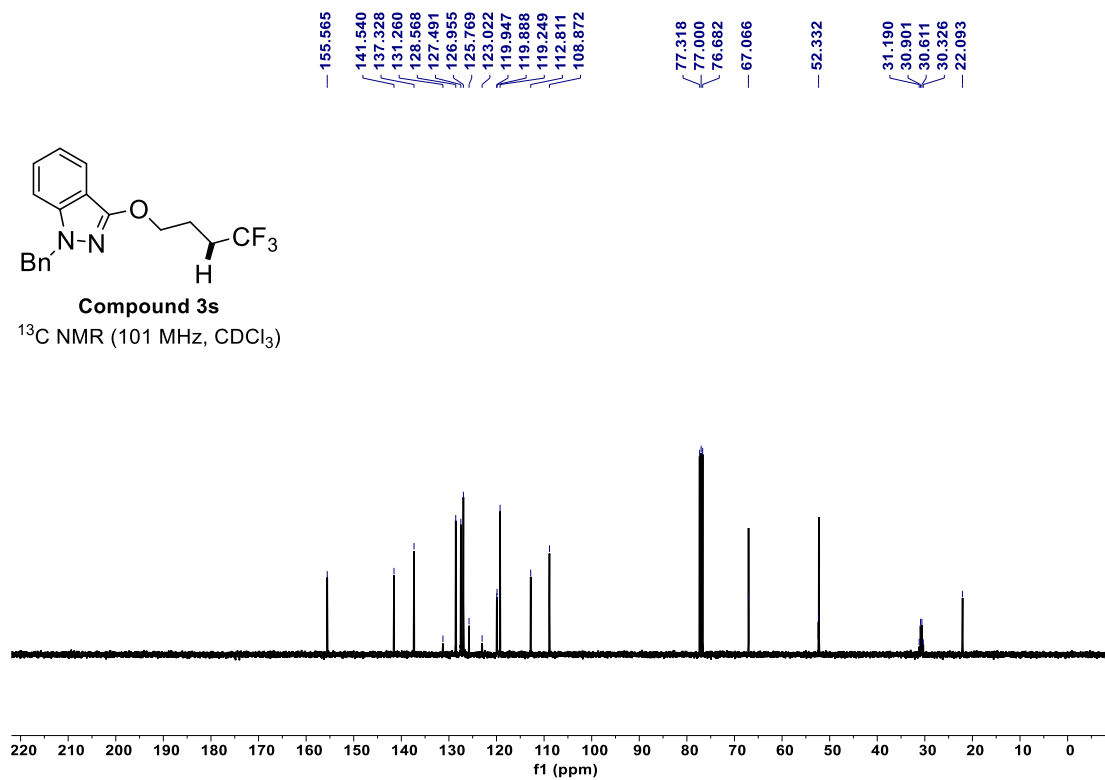

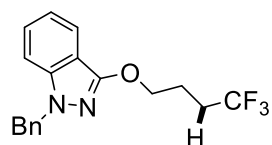

**Compound 3s**

$^{19}\text{F}$  NMR (376 MHz,  $\text{CDCl}_3$ )

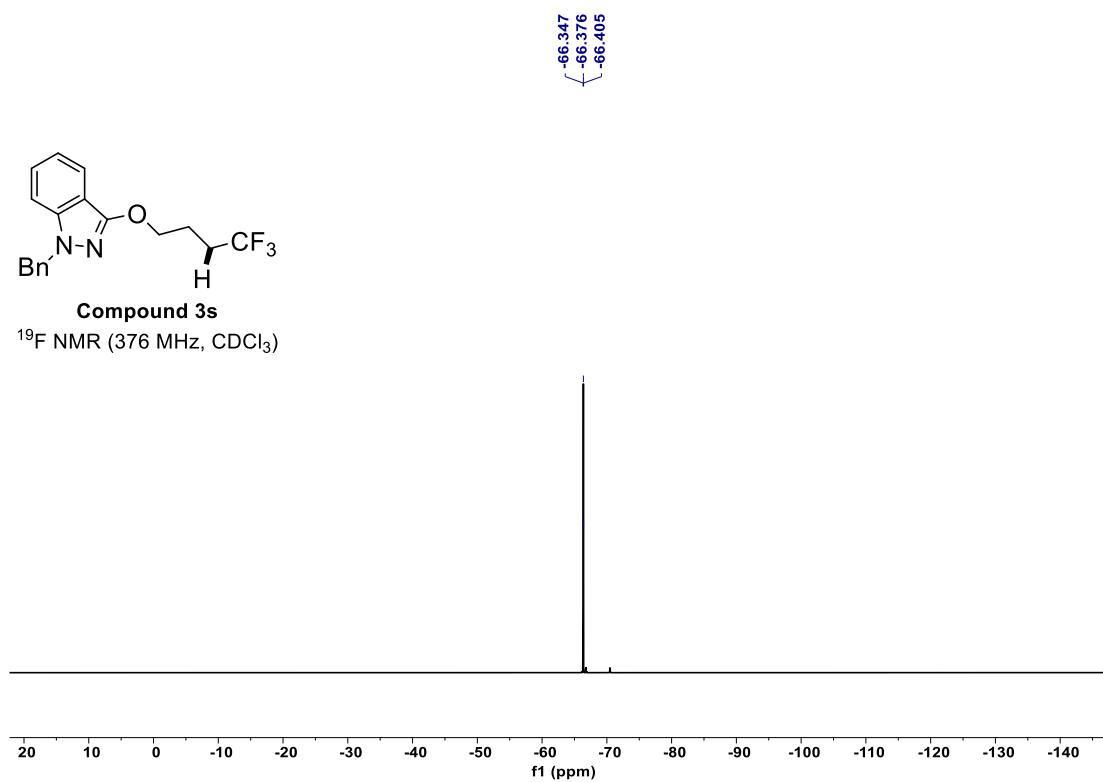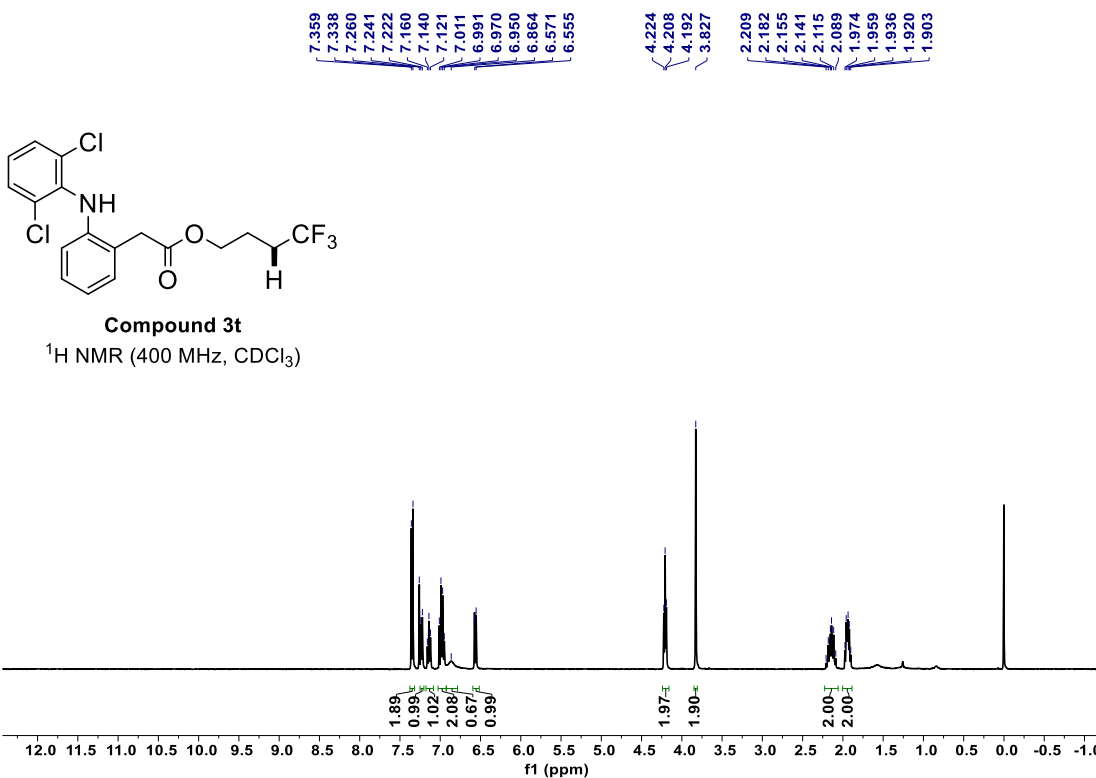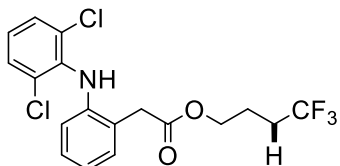

**Compound 3t**

$^1\text{H}$  NMR (400 MHz,  $\text{CDCl}_3$ )

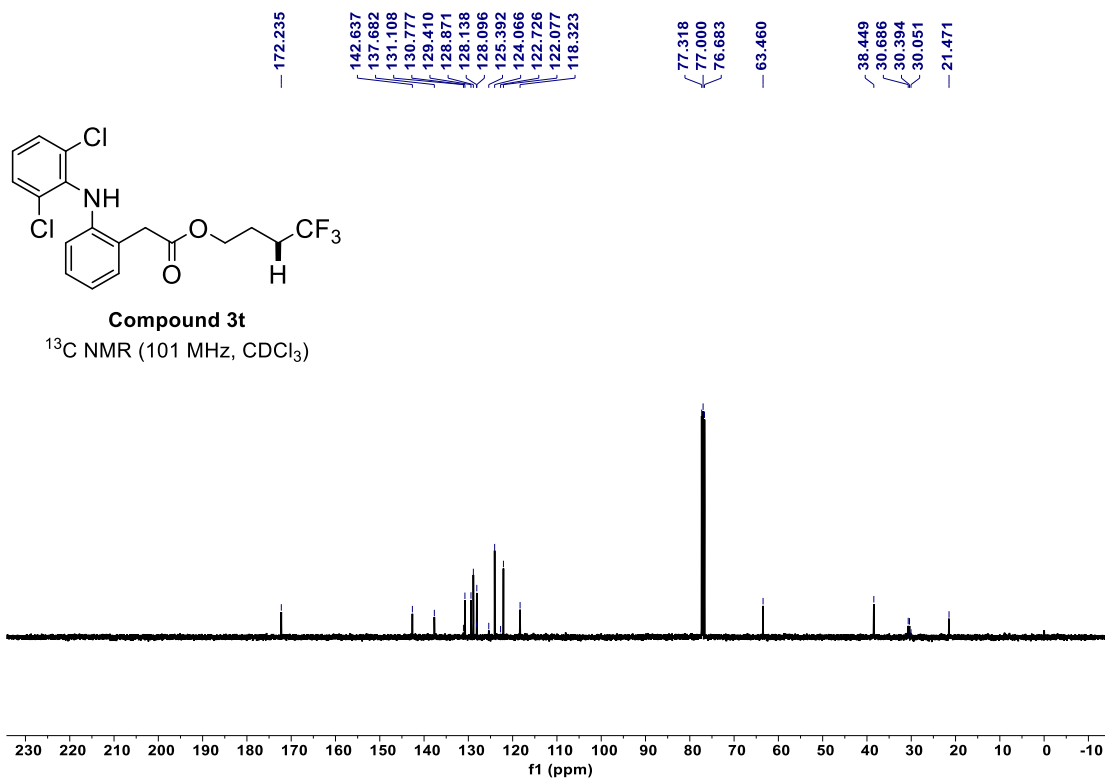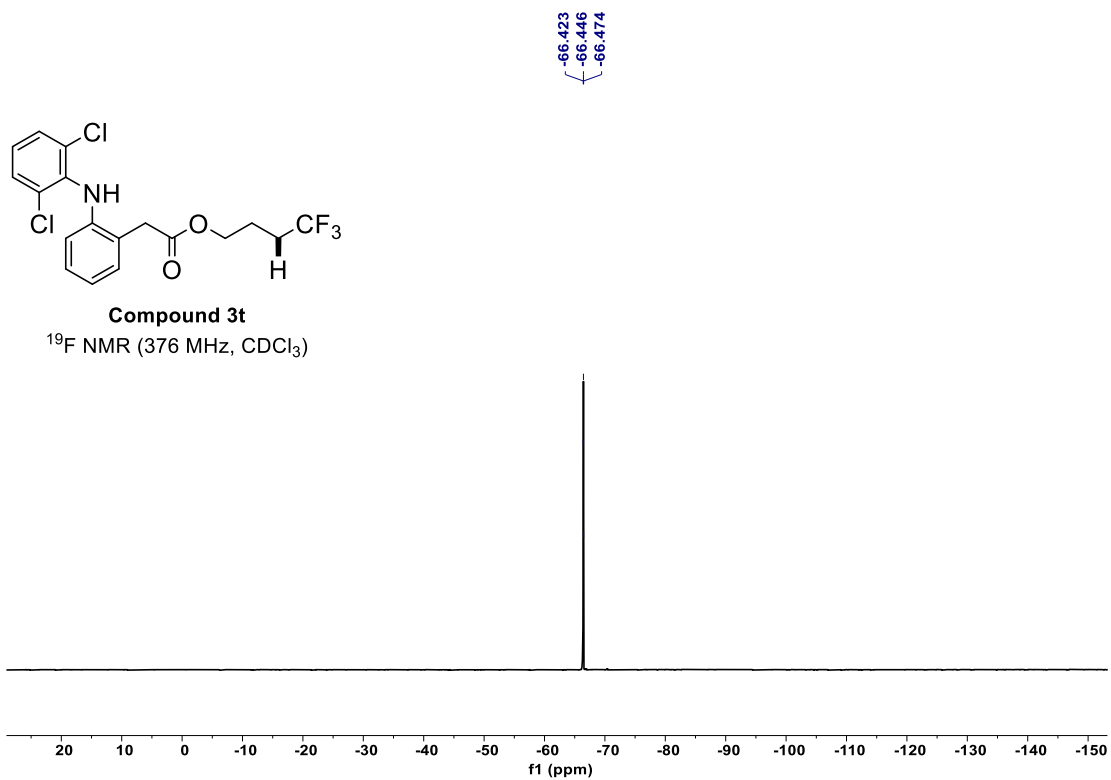

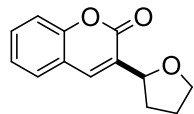

Compound 4a-1

<sup>1</sup>H NMR (400 MHz, CDCl<sub>3</sub>)

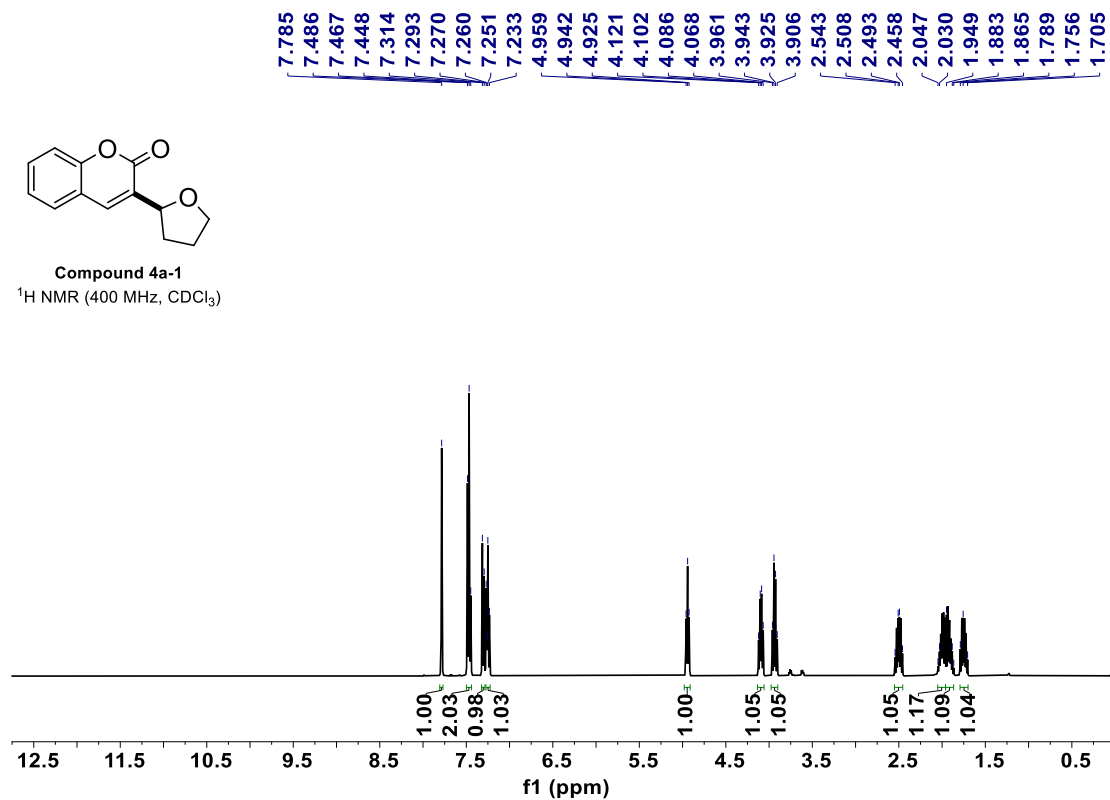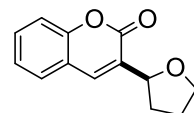

Compound 4a-1

<sup>13</sup>C NMR (101 MHz, CDCl<sub>3</sub>)

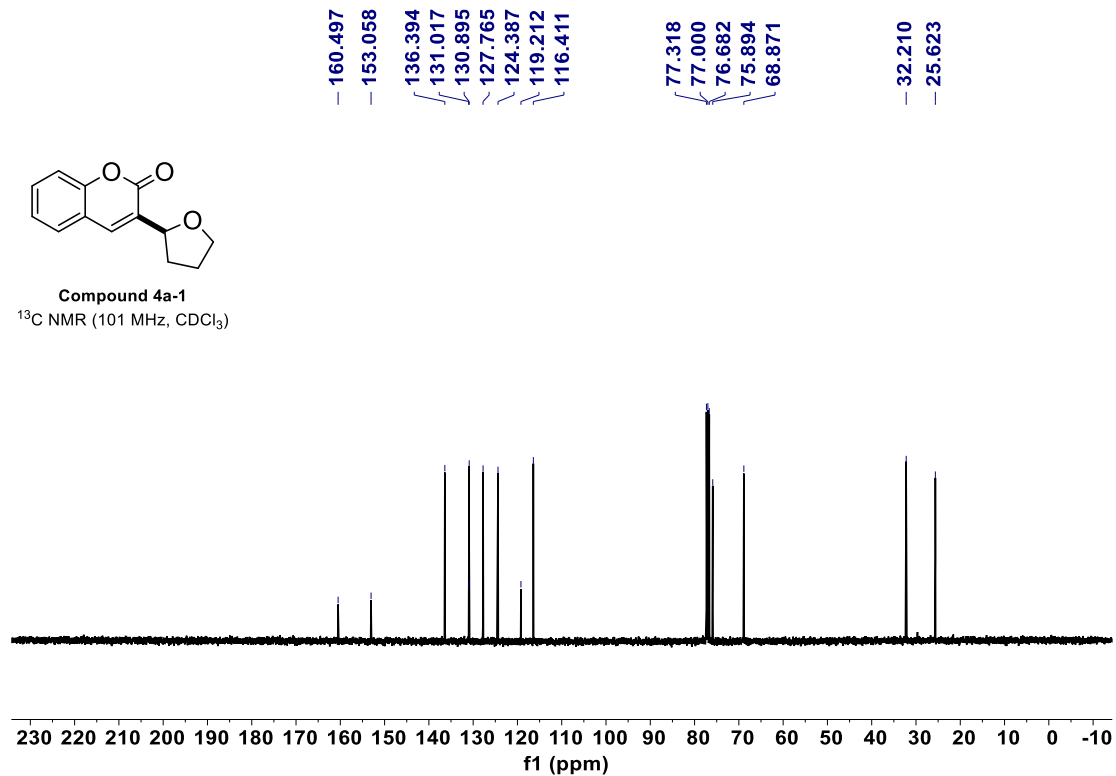

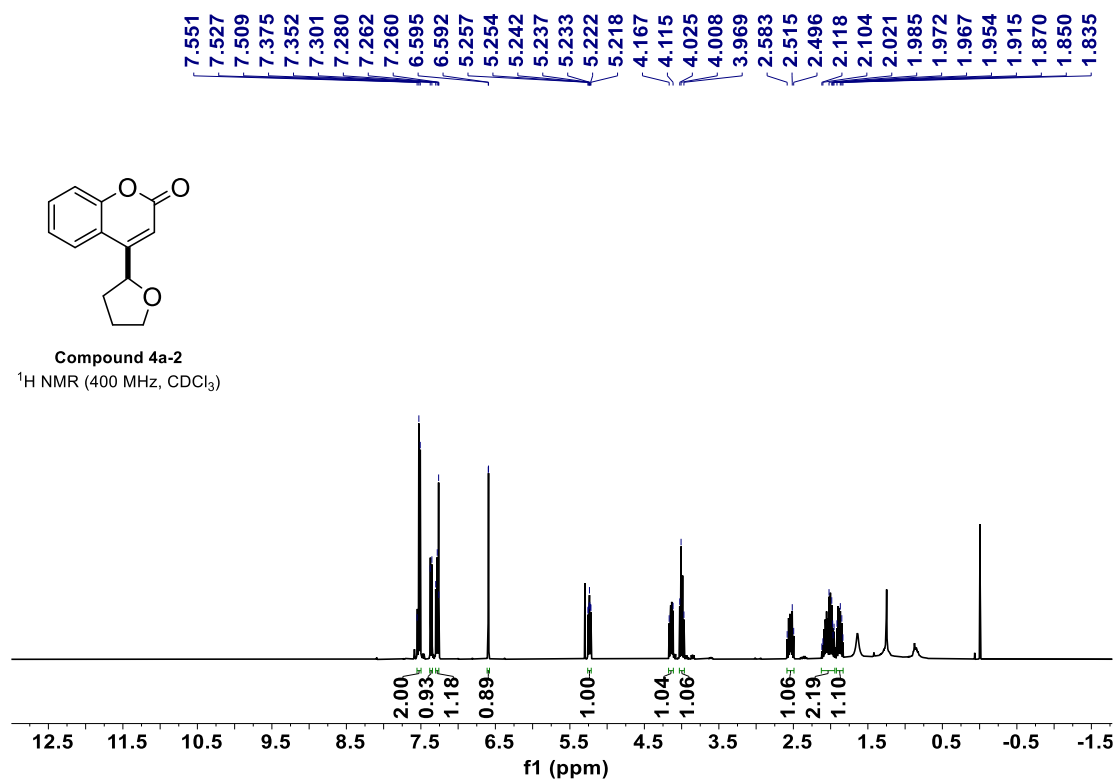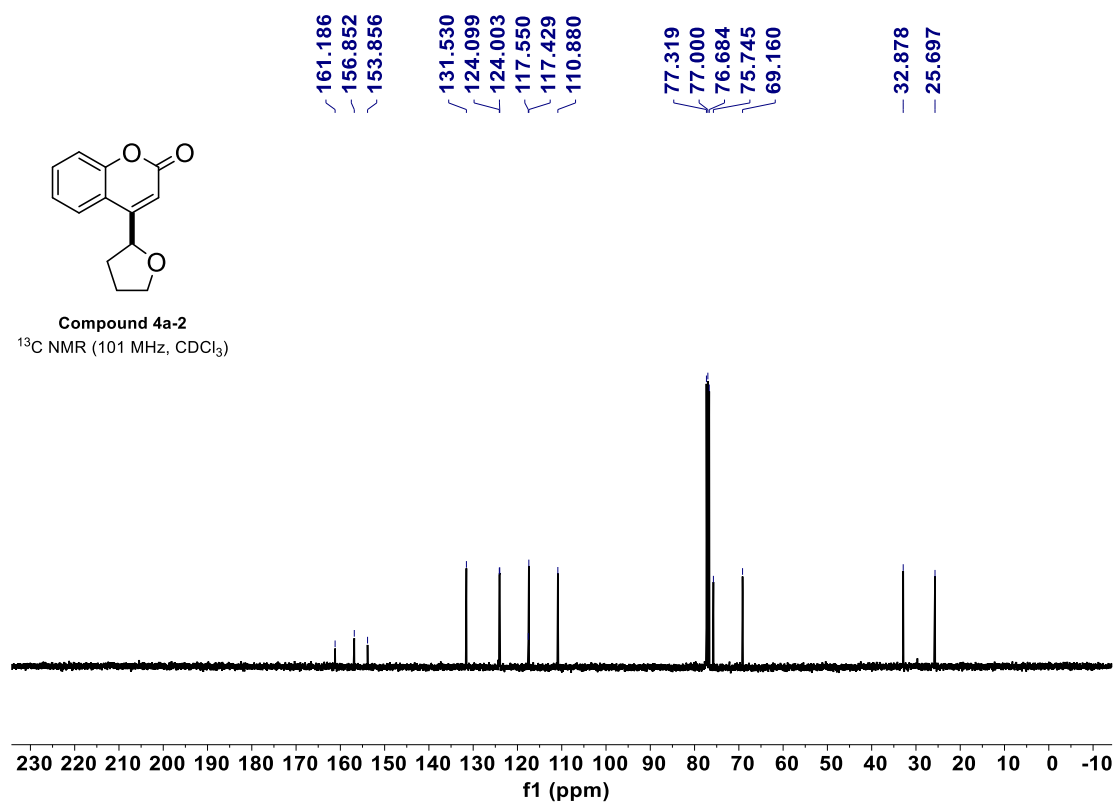

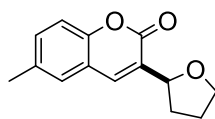

Compound 4b-1

<sup>1</sup>H NMR (400 MHz, CDCl<sub>3</sub>)

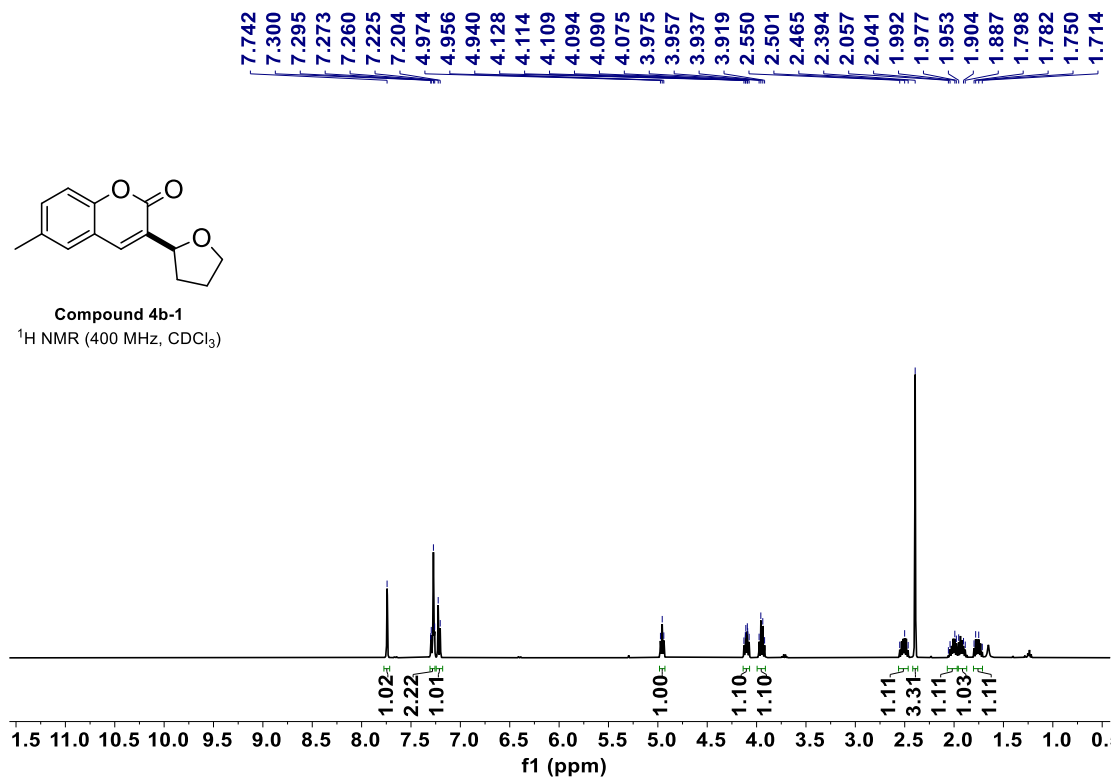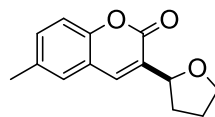

Compound 4b-1

<sup>13</sup>C NMR (101 MHz, CDCl<sub>3</sub>)

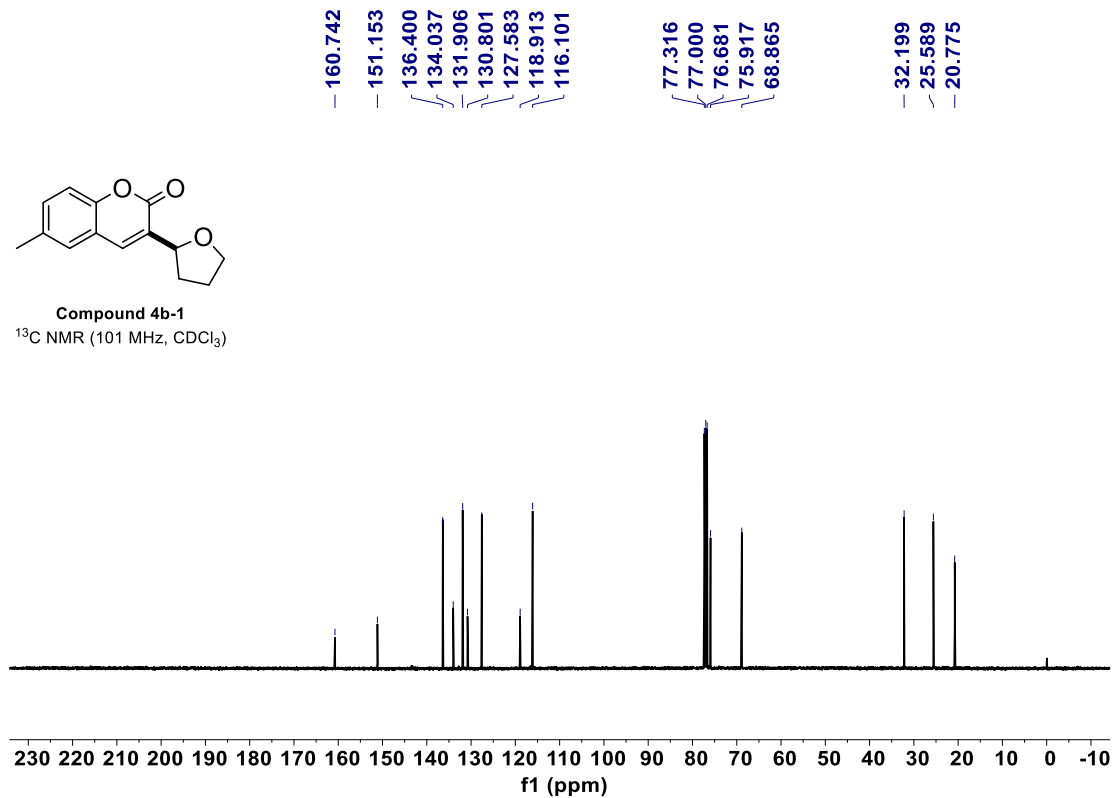



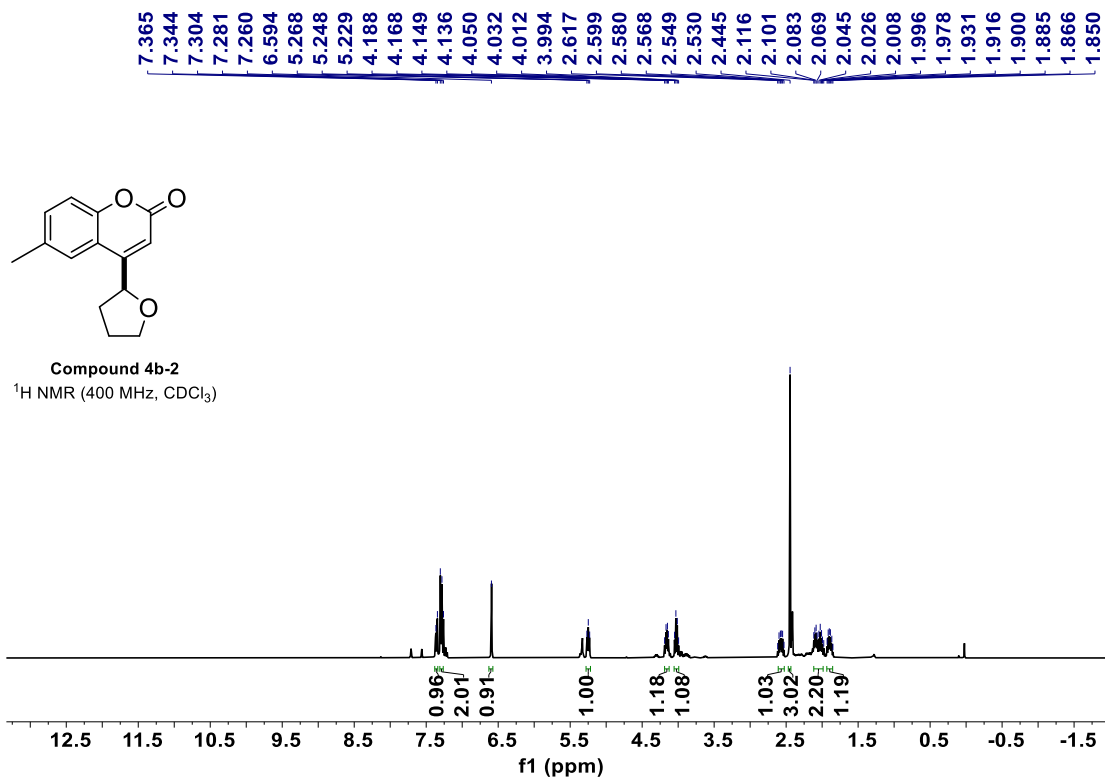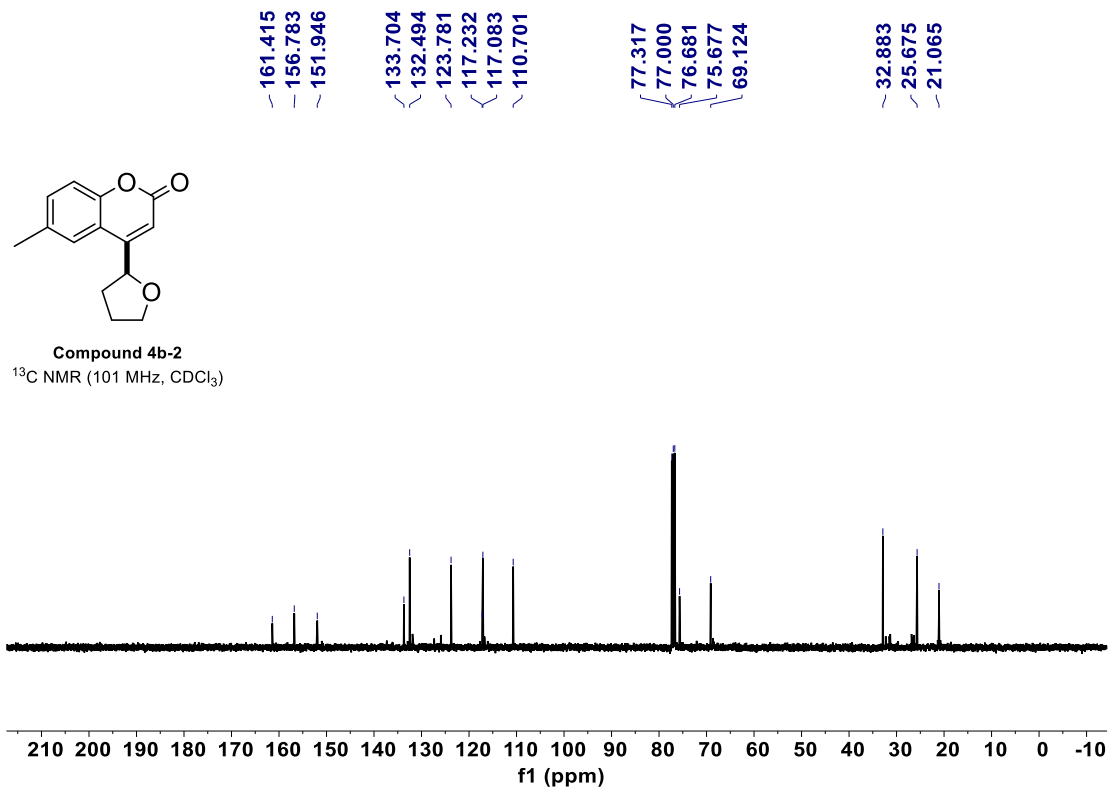

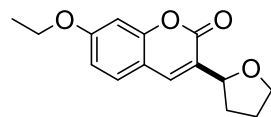

Compound 4c-1  
<sup>1</sup>H NMR (400 MHz, CDCl<sub>3</sub>)

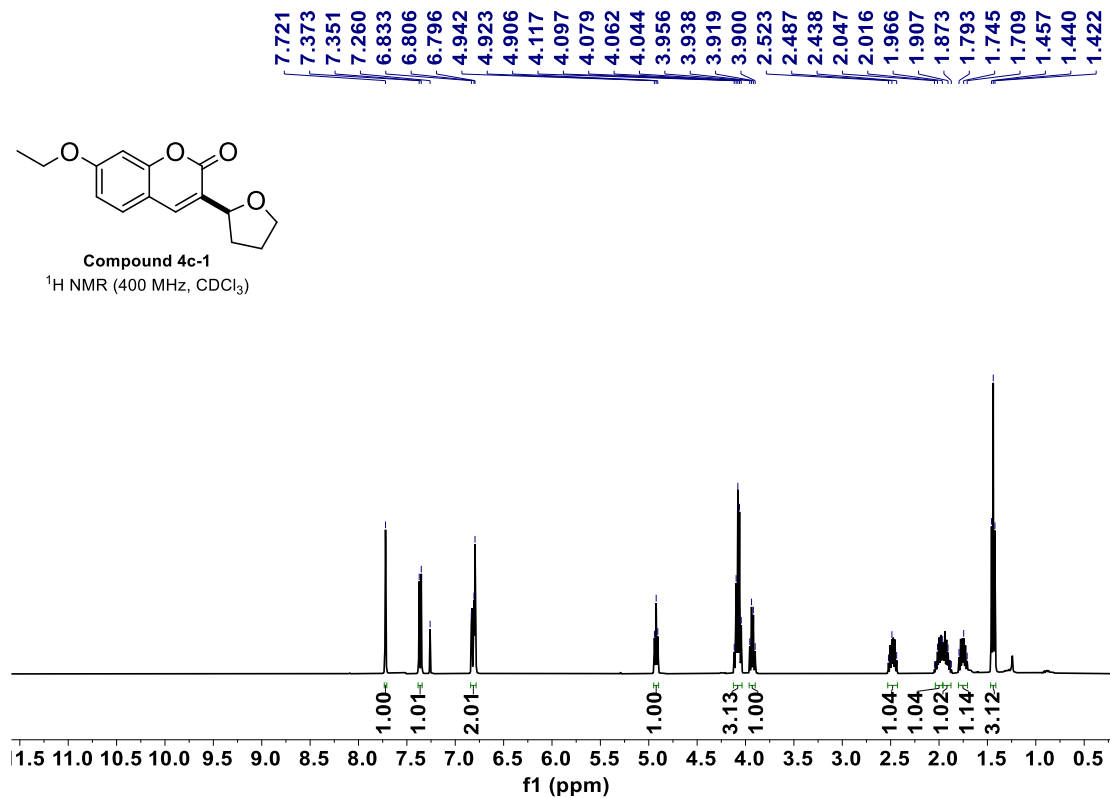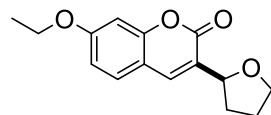

Compound 4c-1  
<sup>13</sup>C NMR (101 MHz, CDCl<sub>3</sub>)

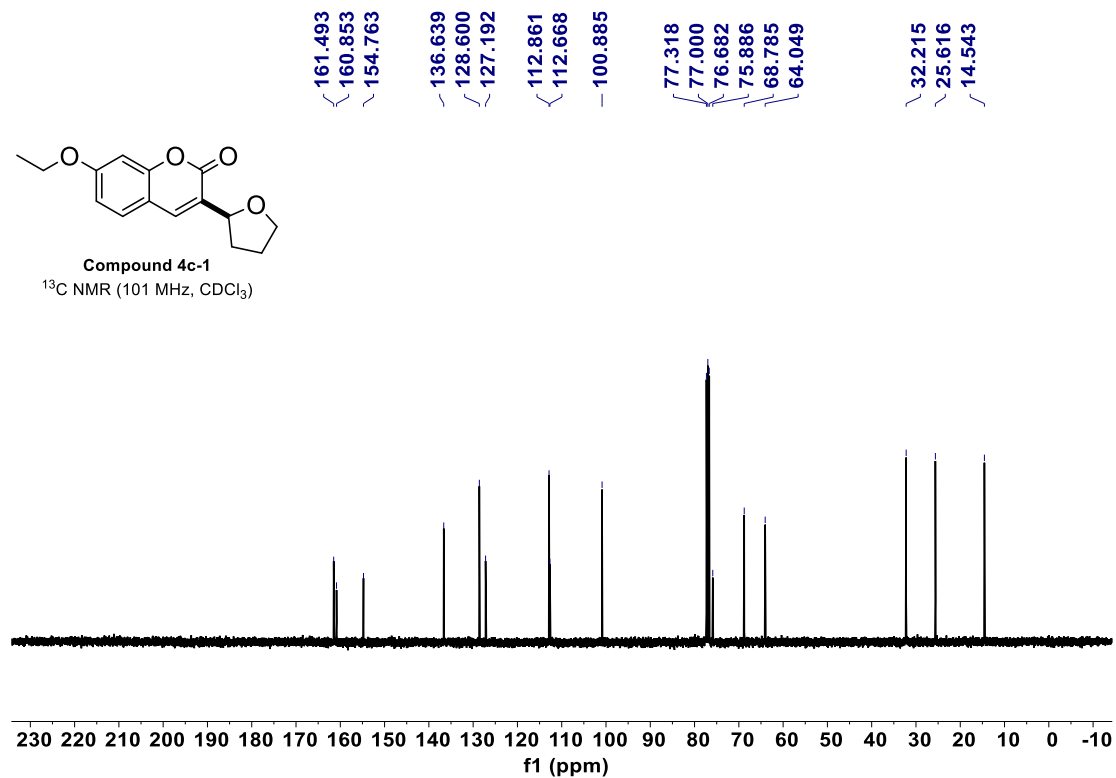

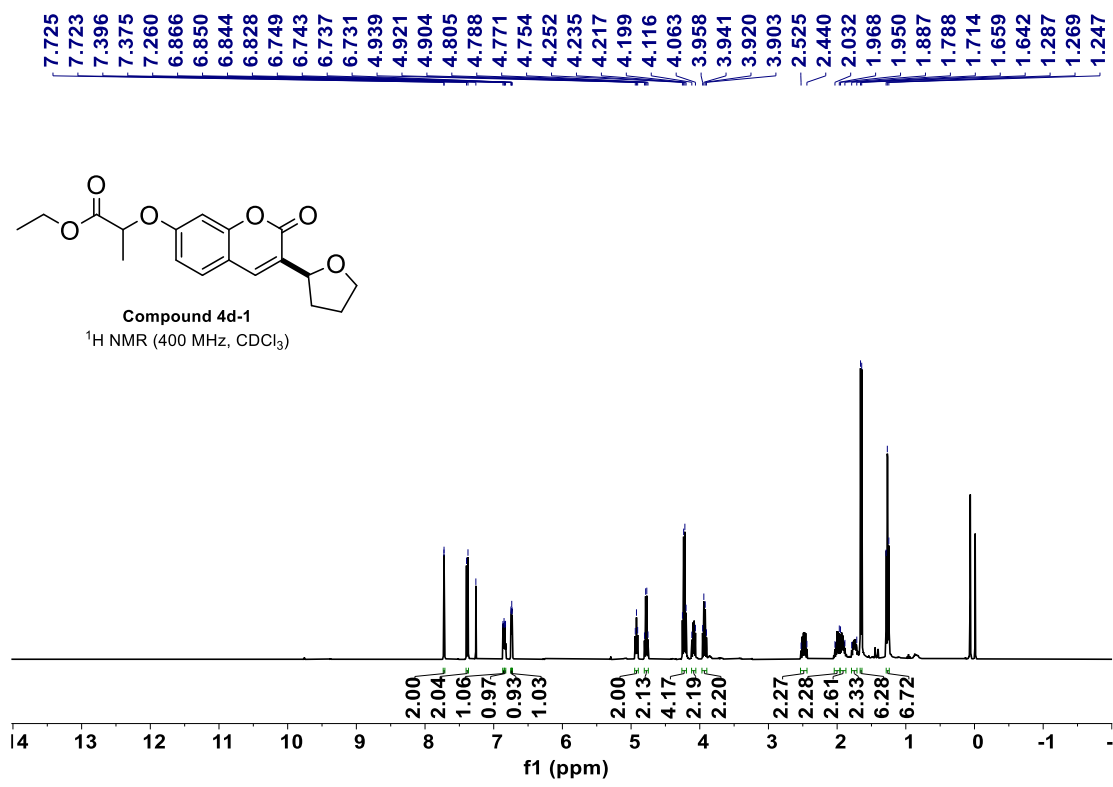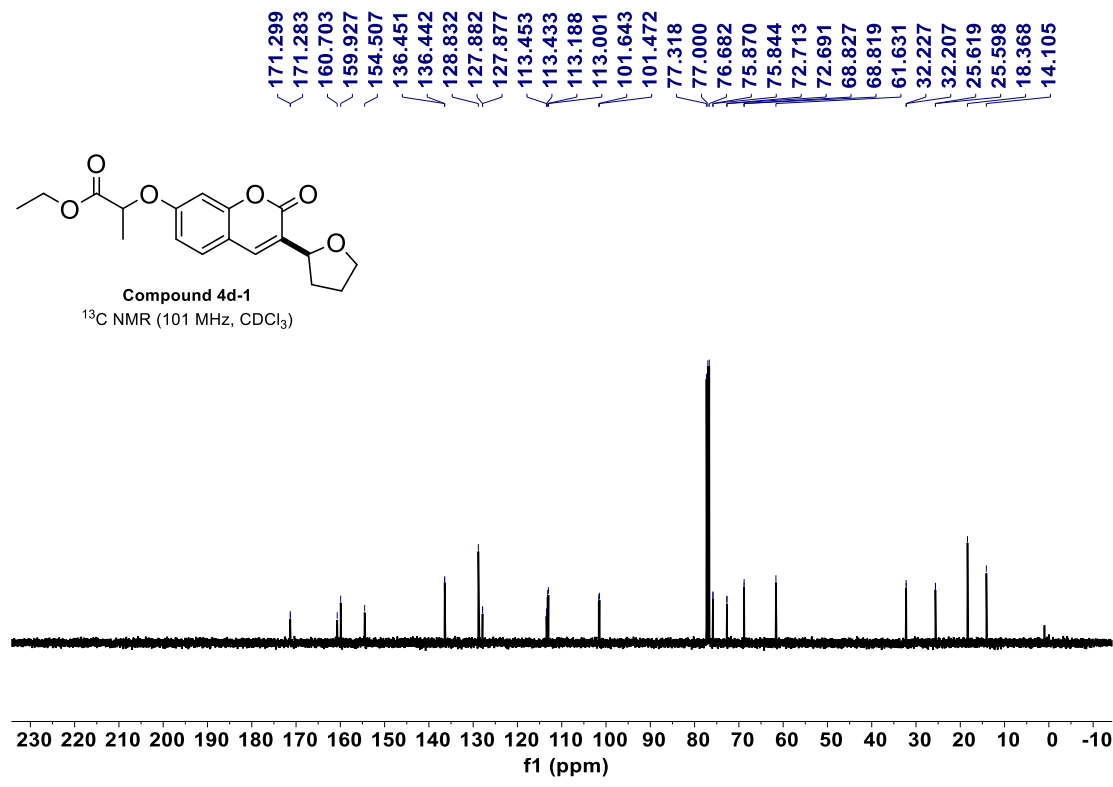

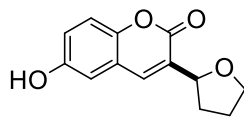

Compound 4e-1  
<sup>1</sup>H NMR (400 MHz, CDCl<sub>3</sub>)

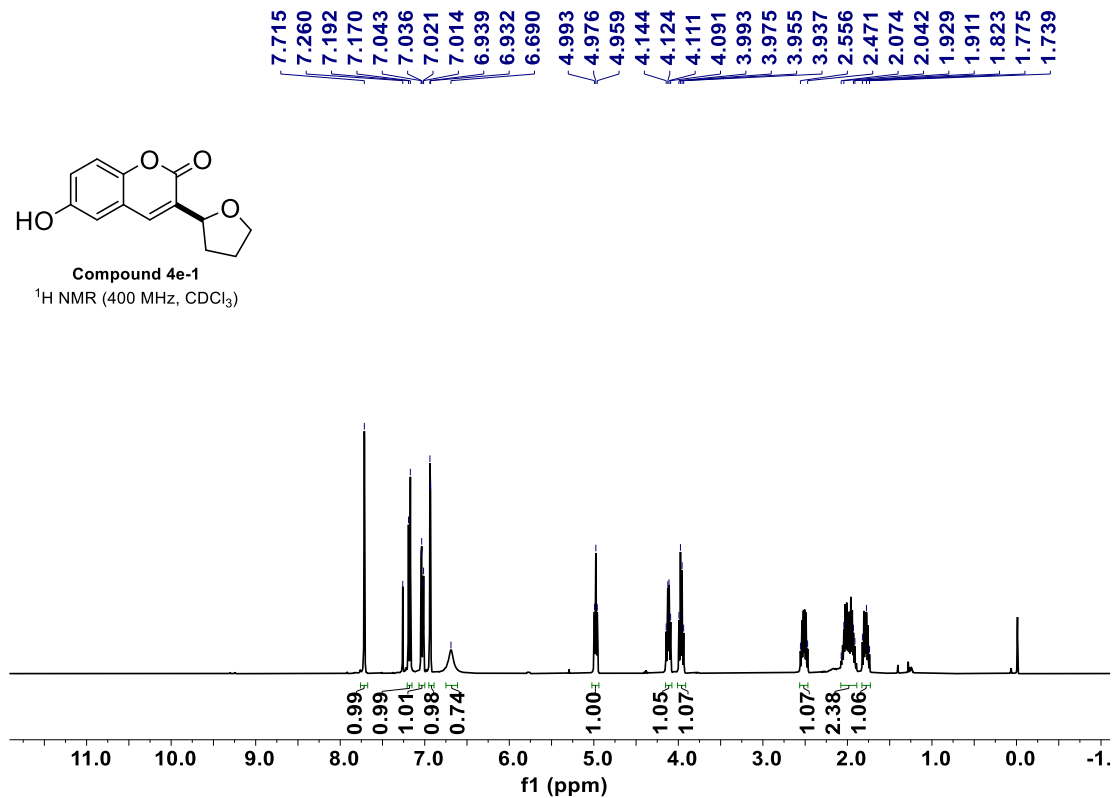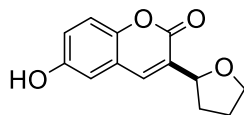

Compound 4e-1  
<sup>13</sup>C NMR (101 MHz, CDCl<sub>3</sub>)

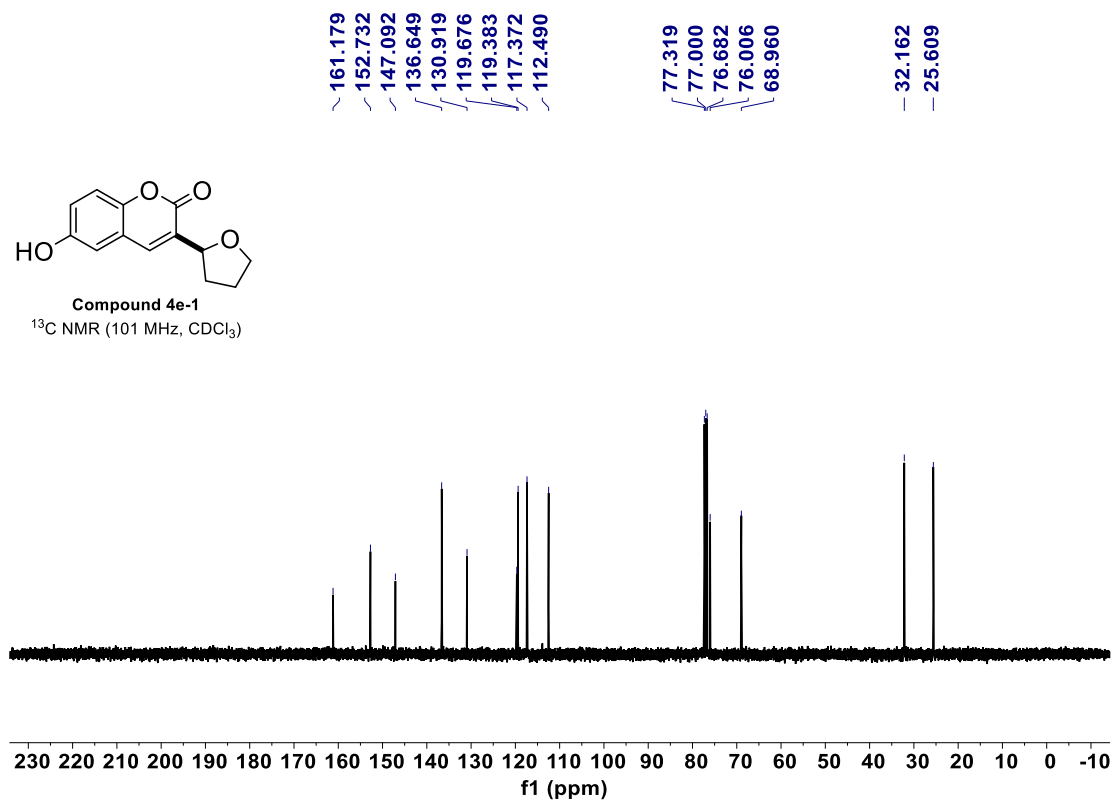

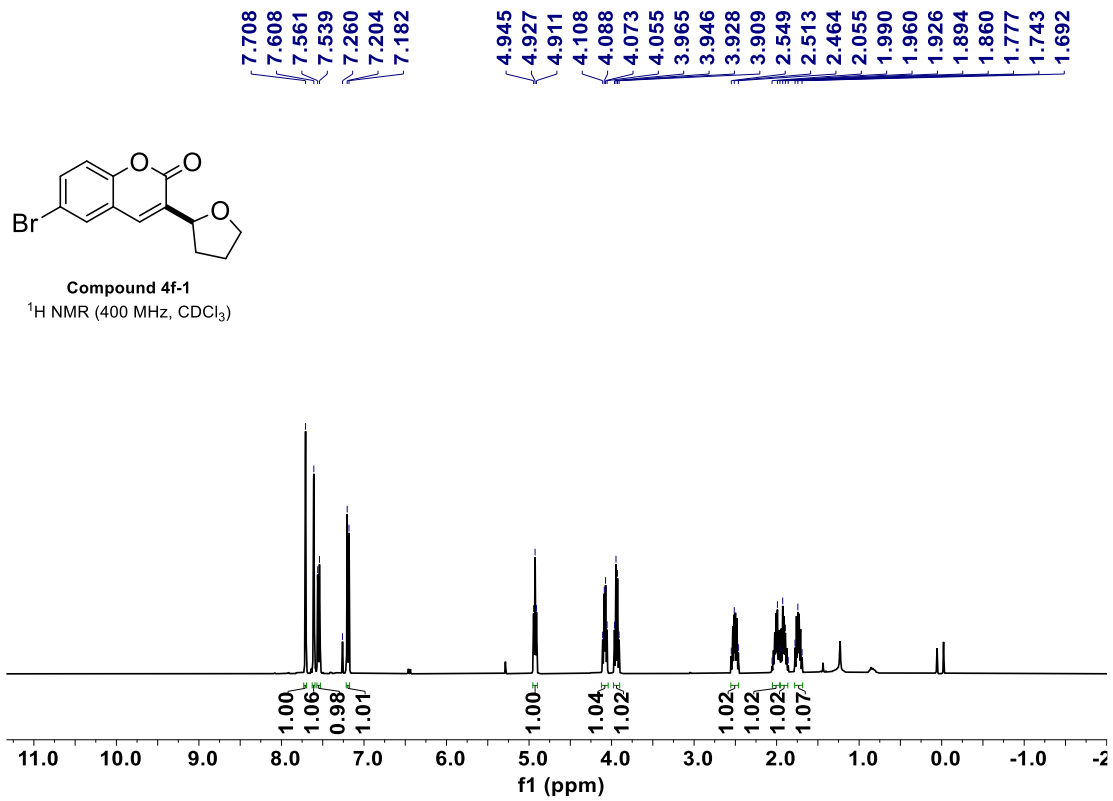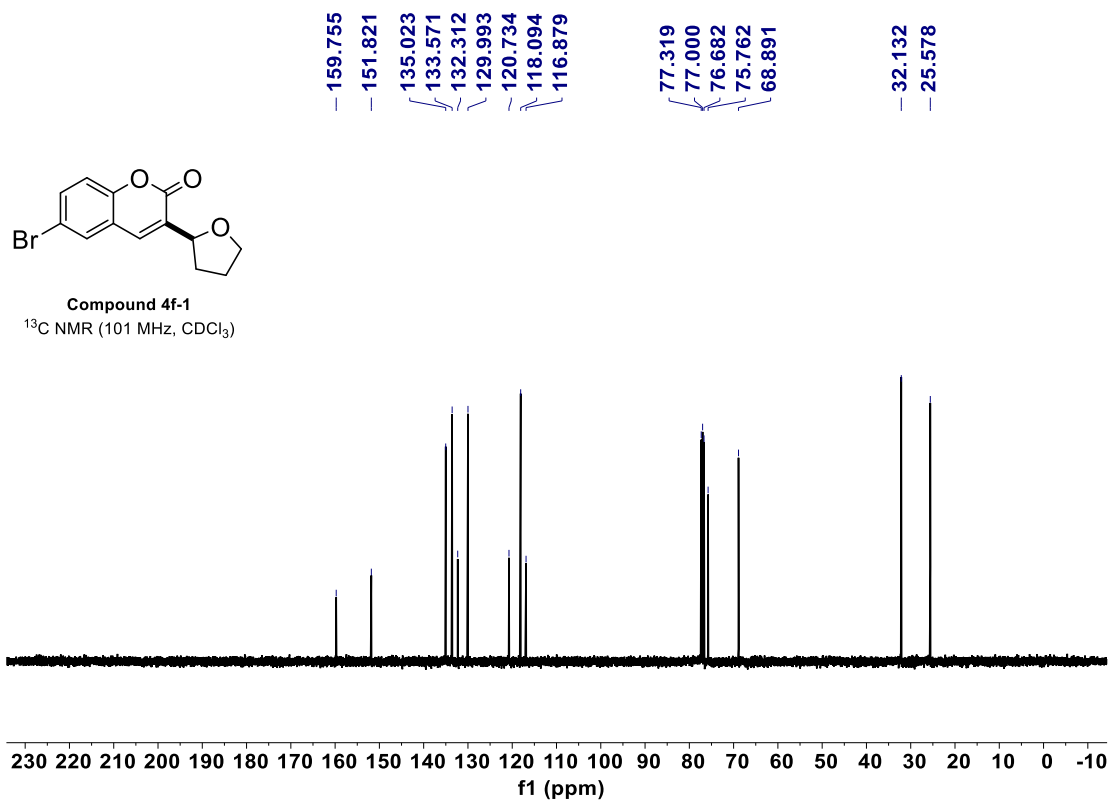

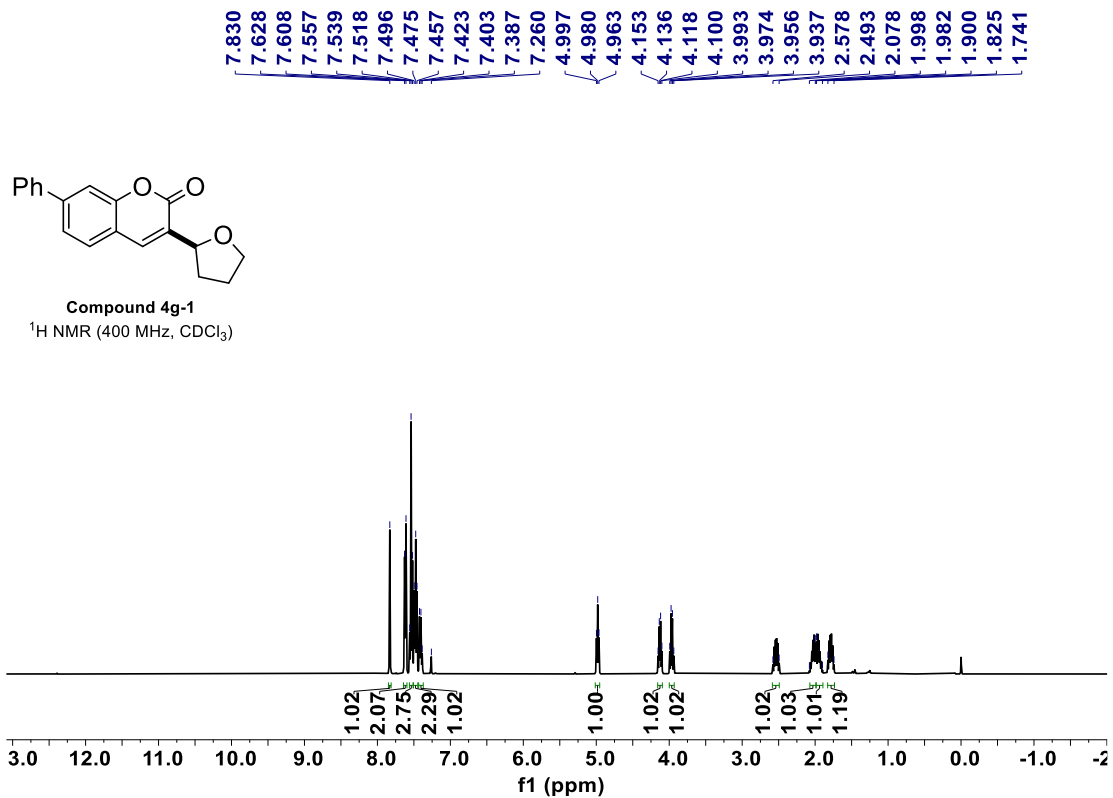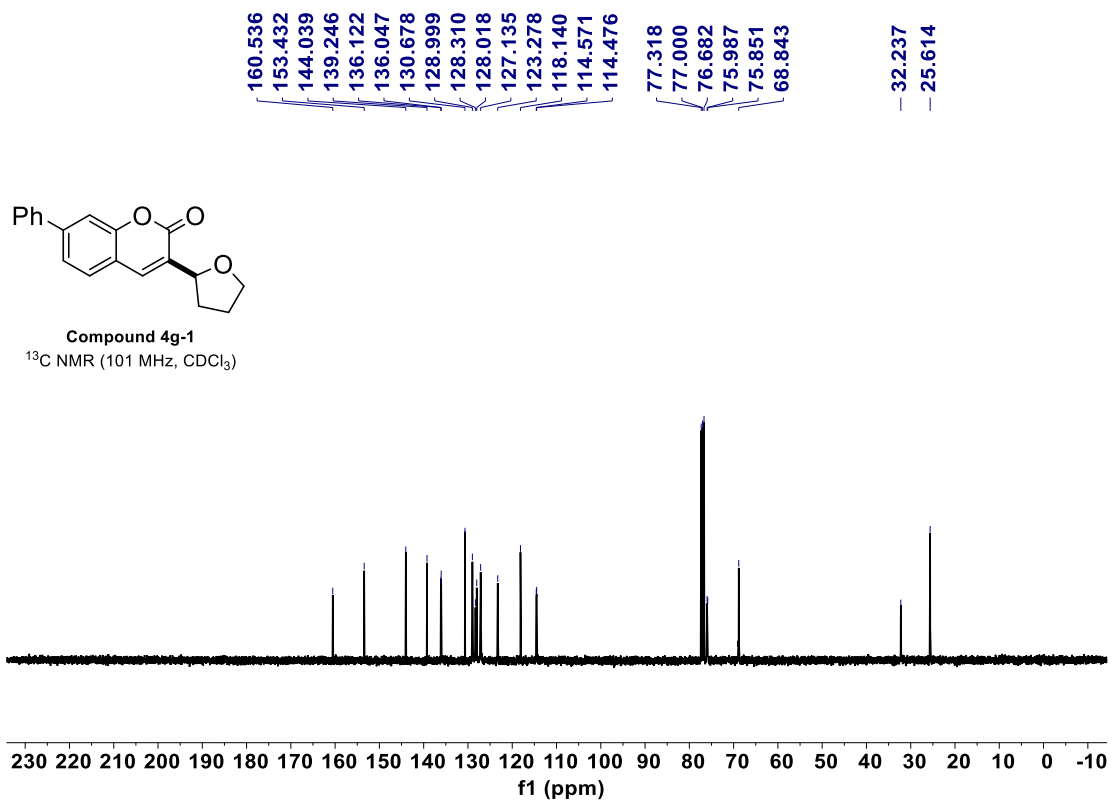

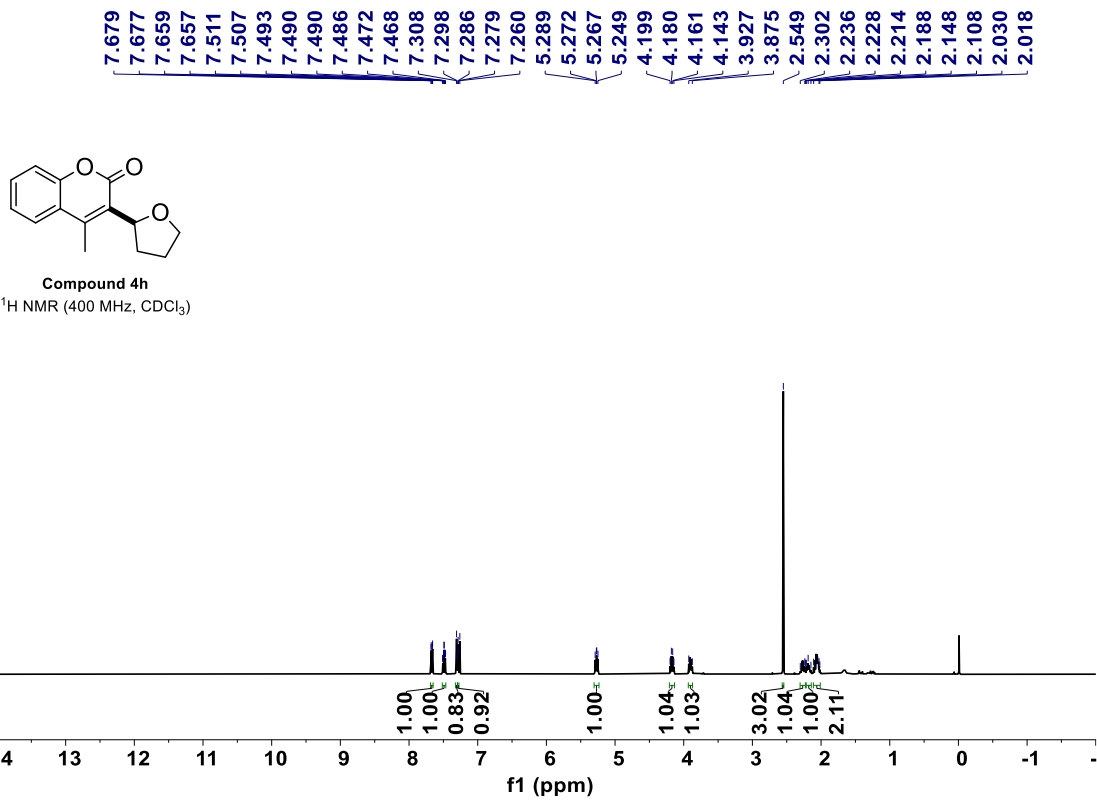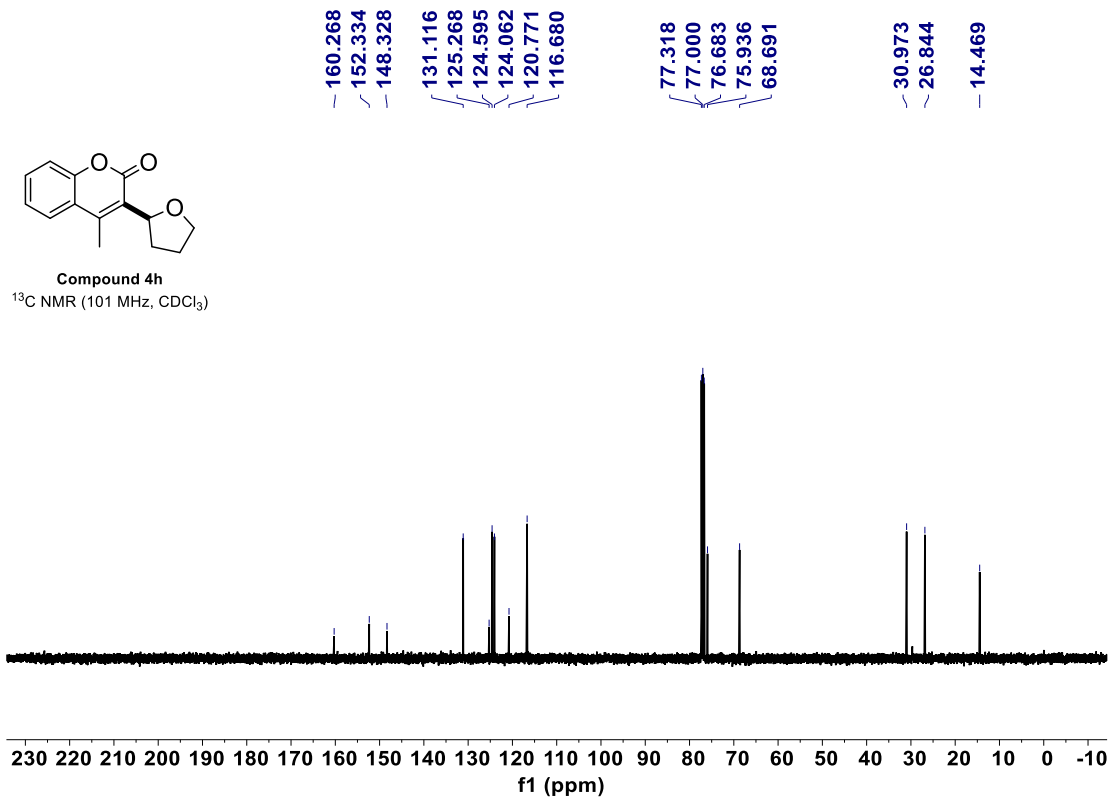

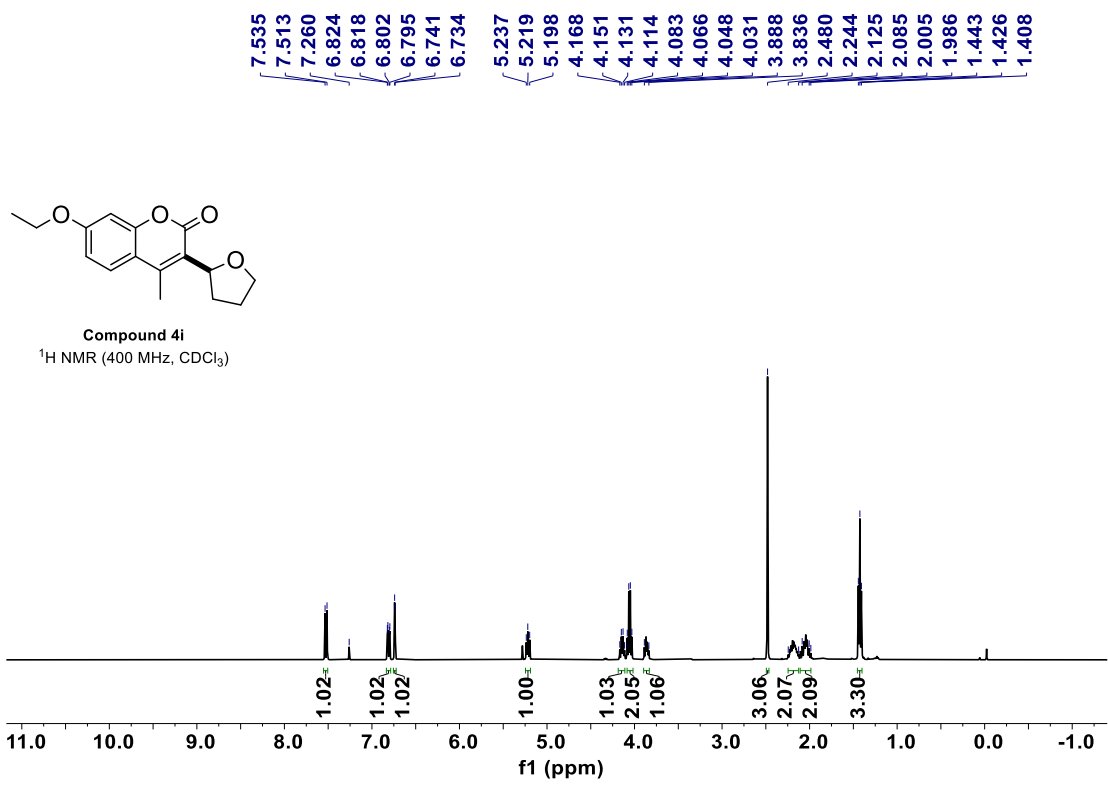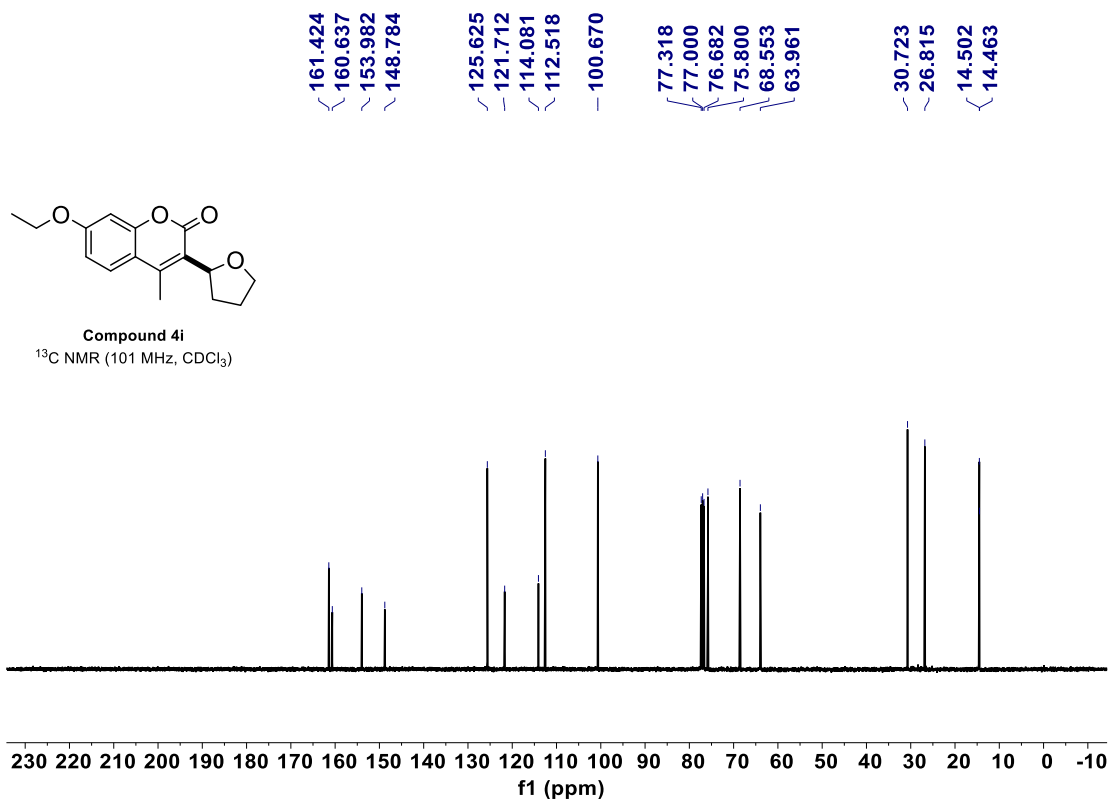



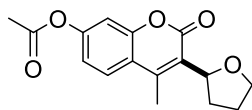

Compound 4j

<sup>1</sup>H NMR (400 MHz, CDCl<sub>3</sub>)

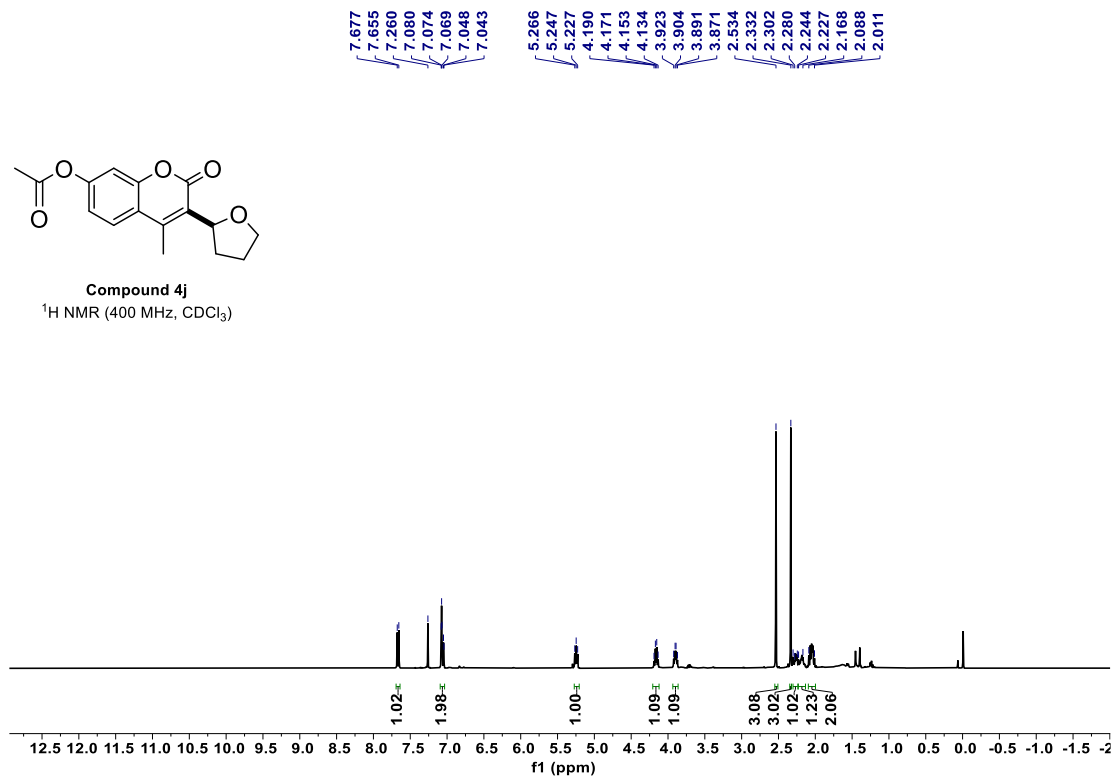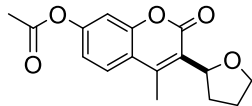

Compound 4j

<sup>13</sup>C NMR (101 MHz, CDCl<sub>3</sub>)

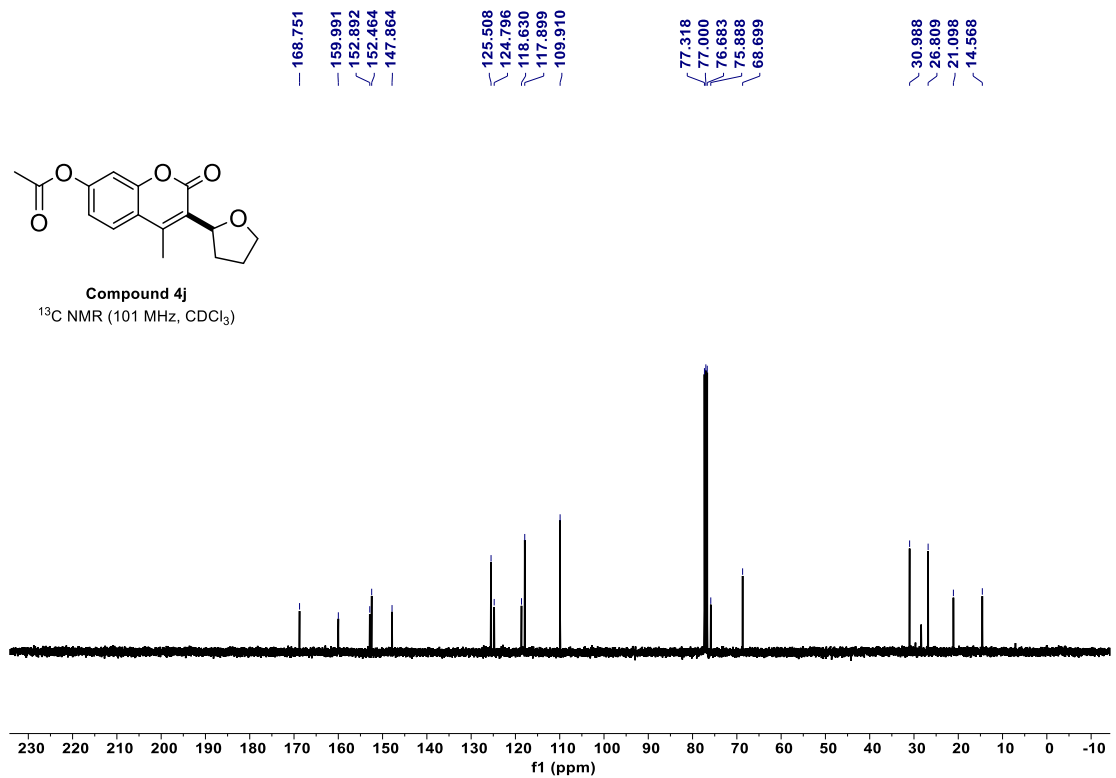

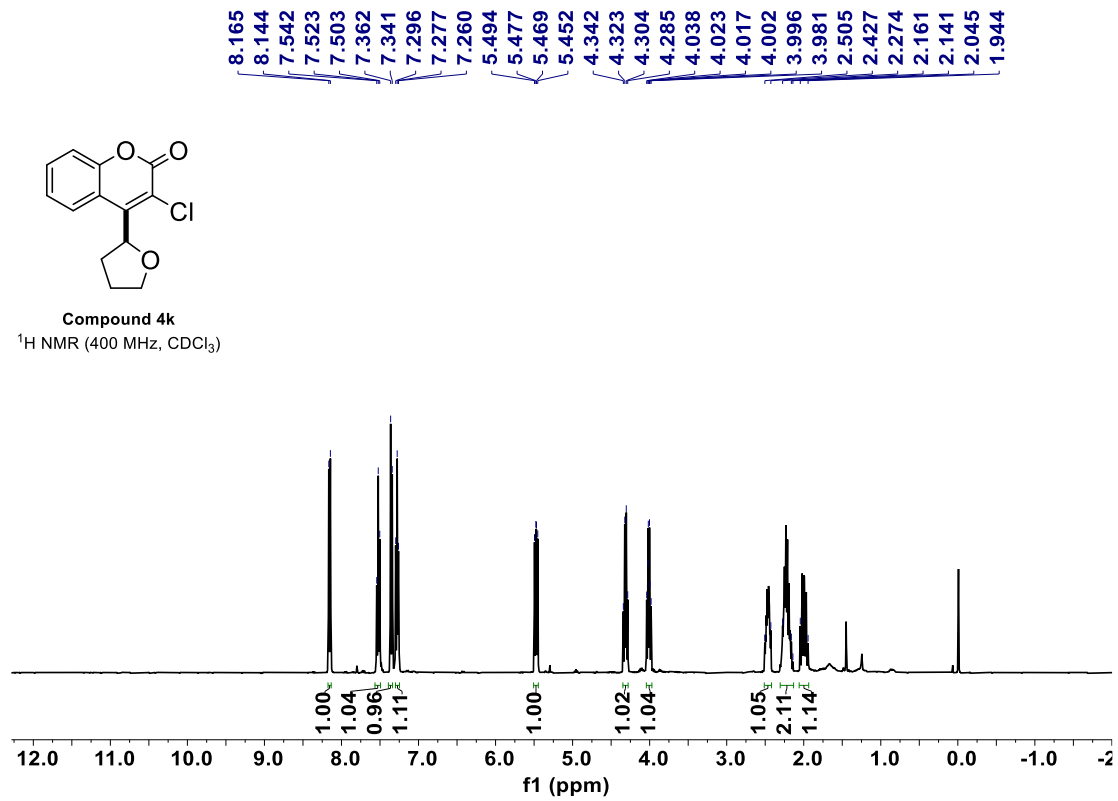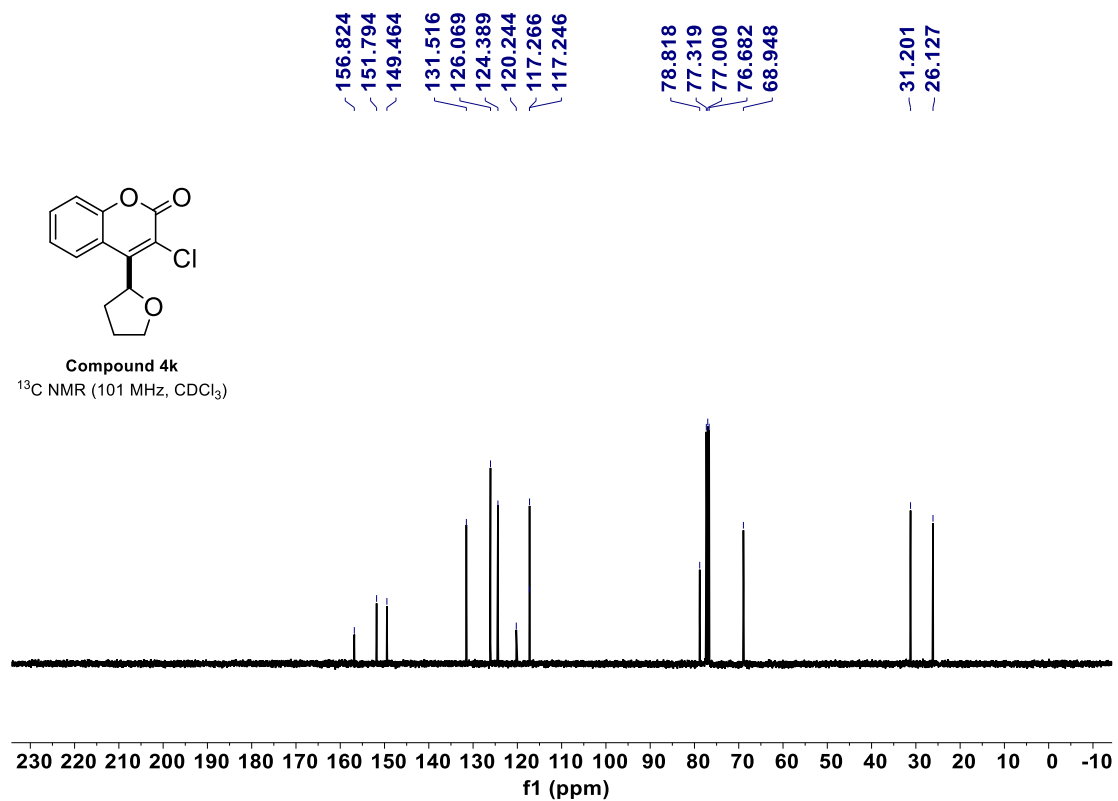

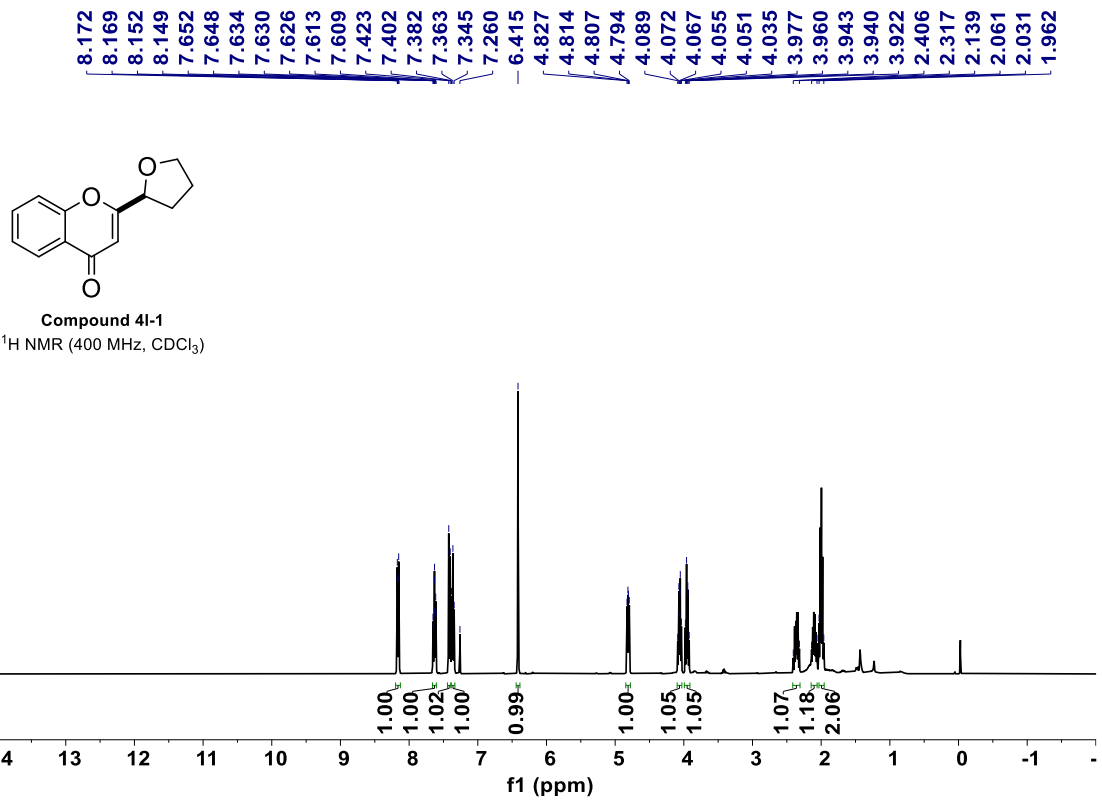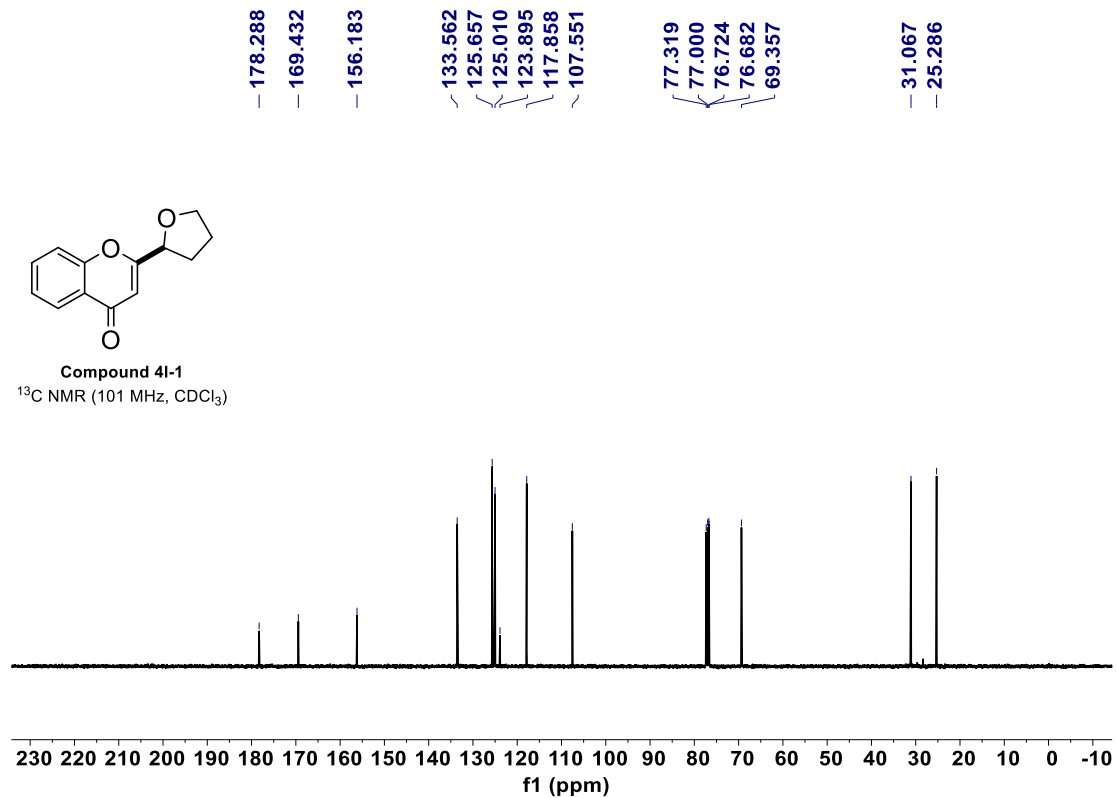

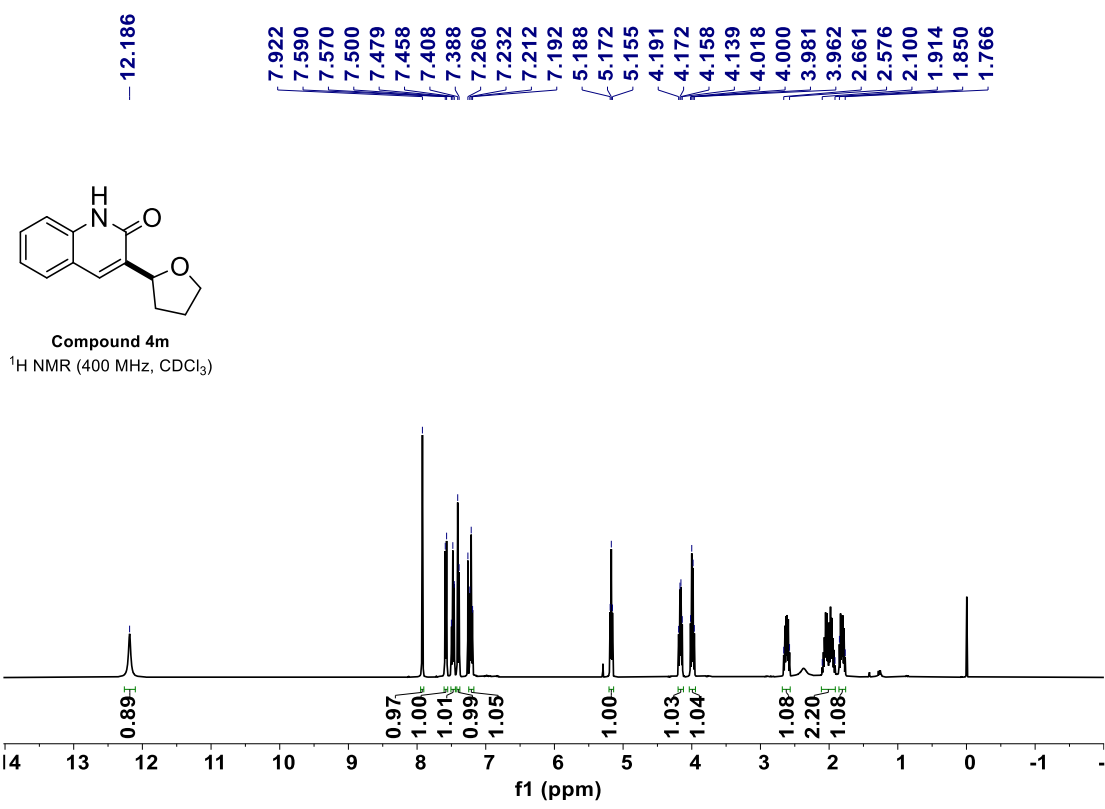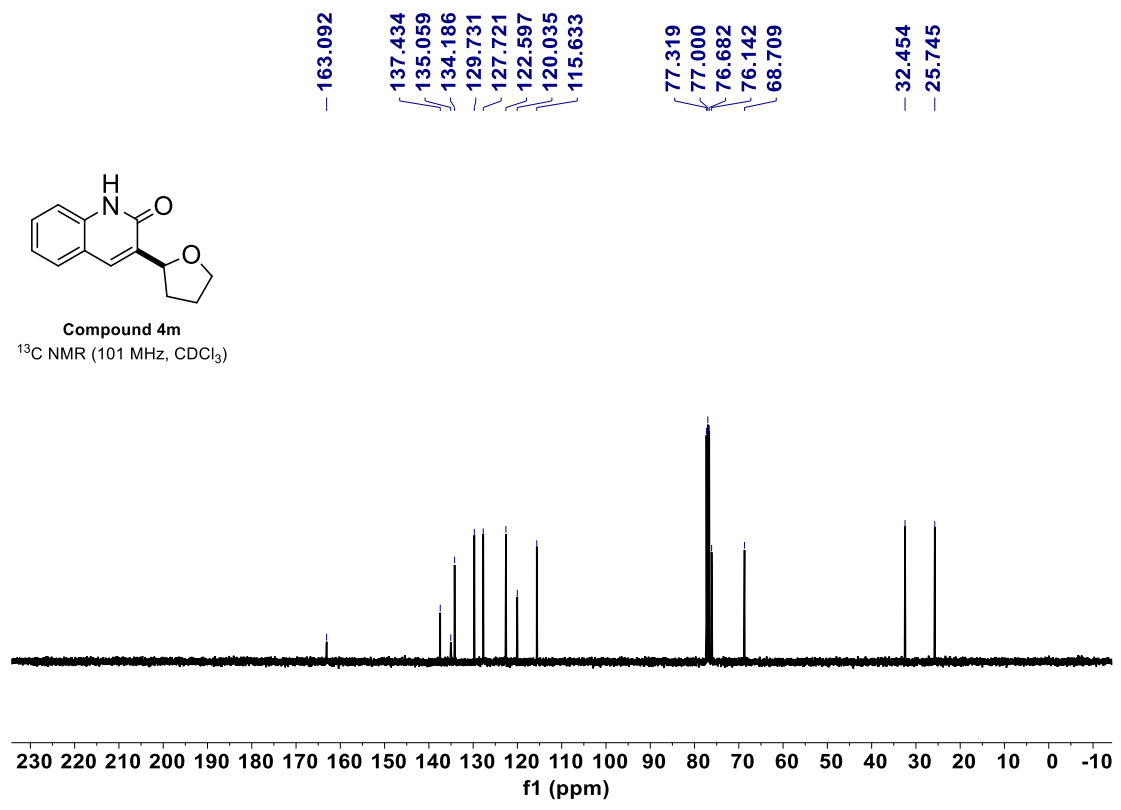

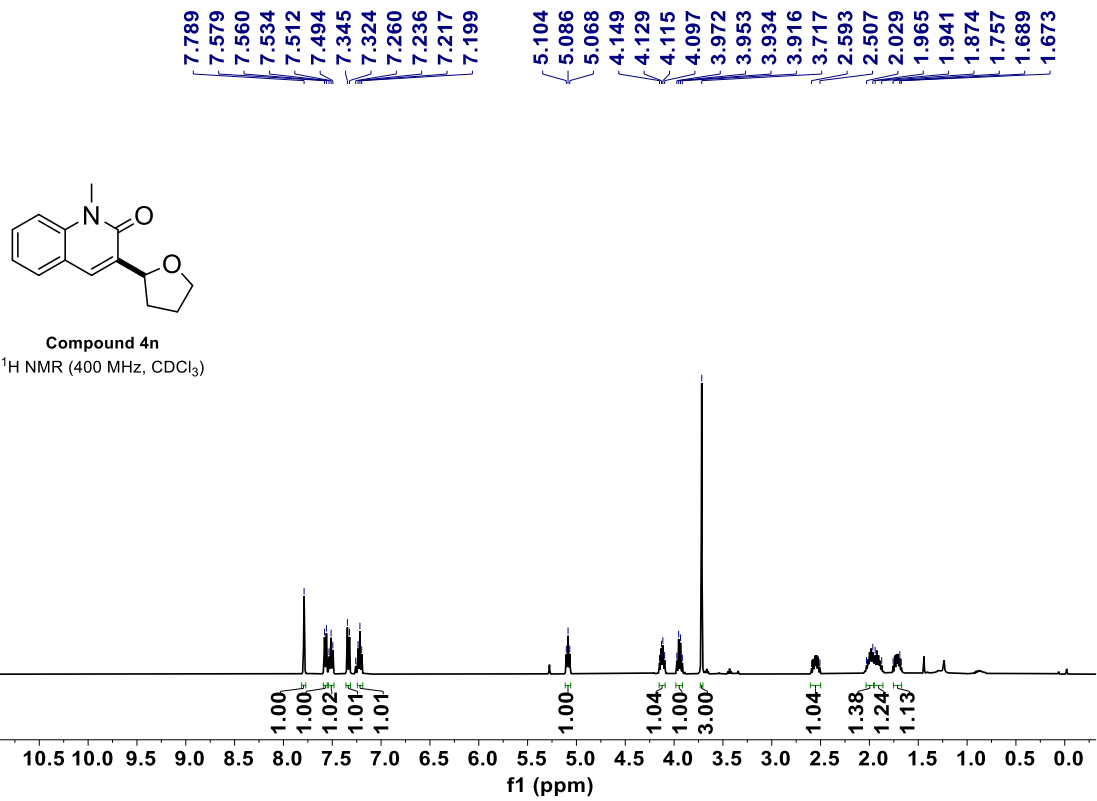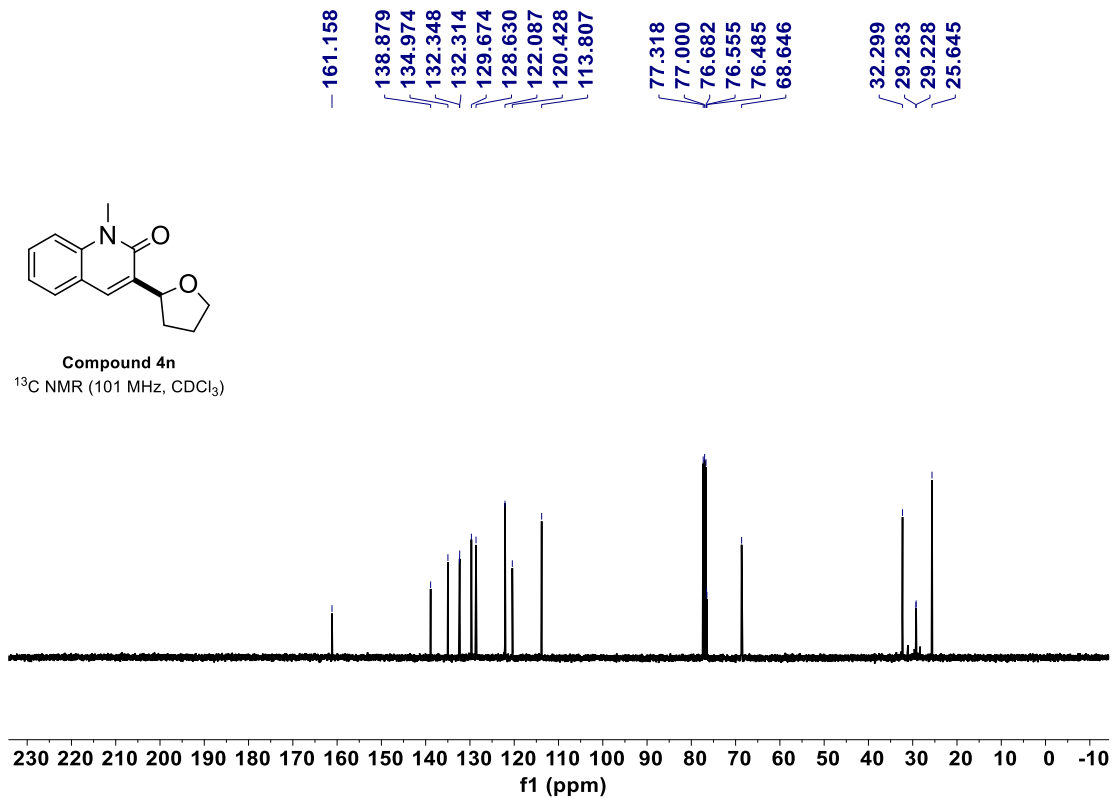

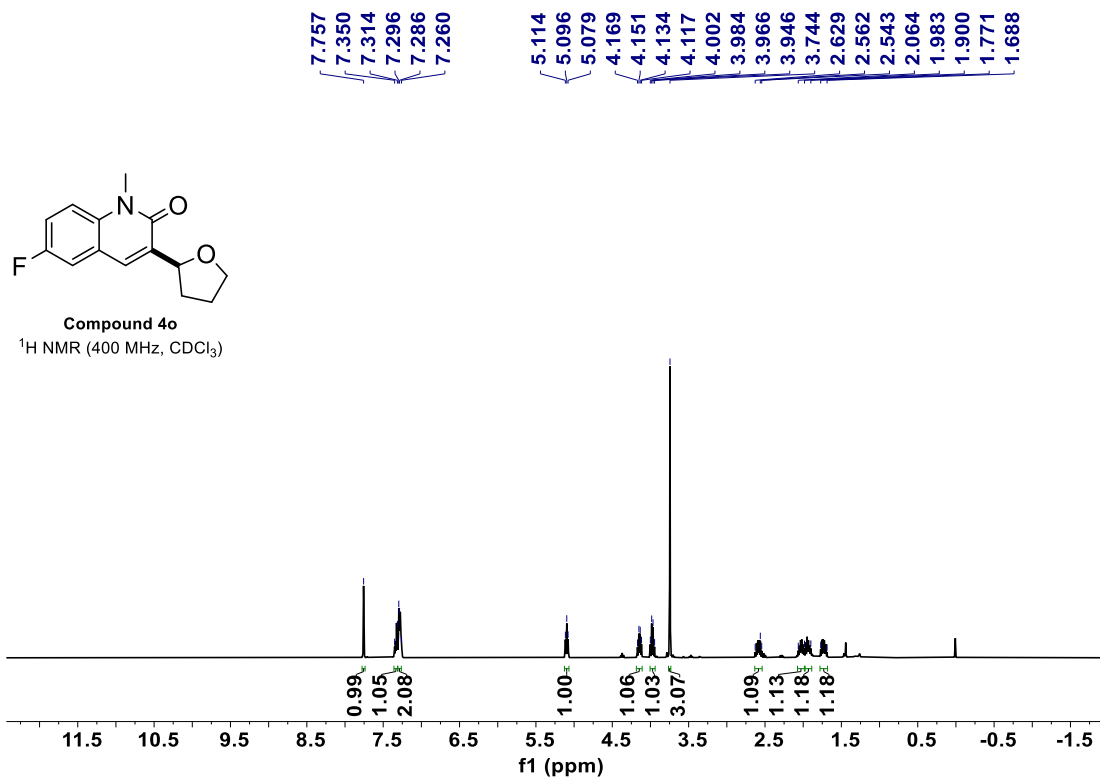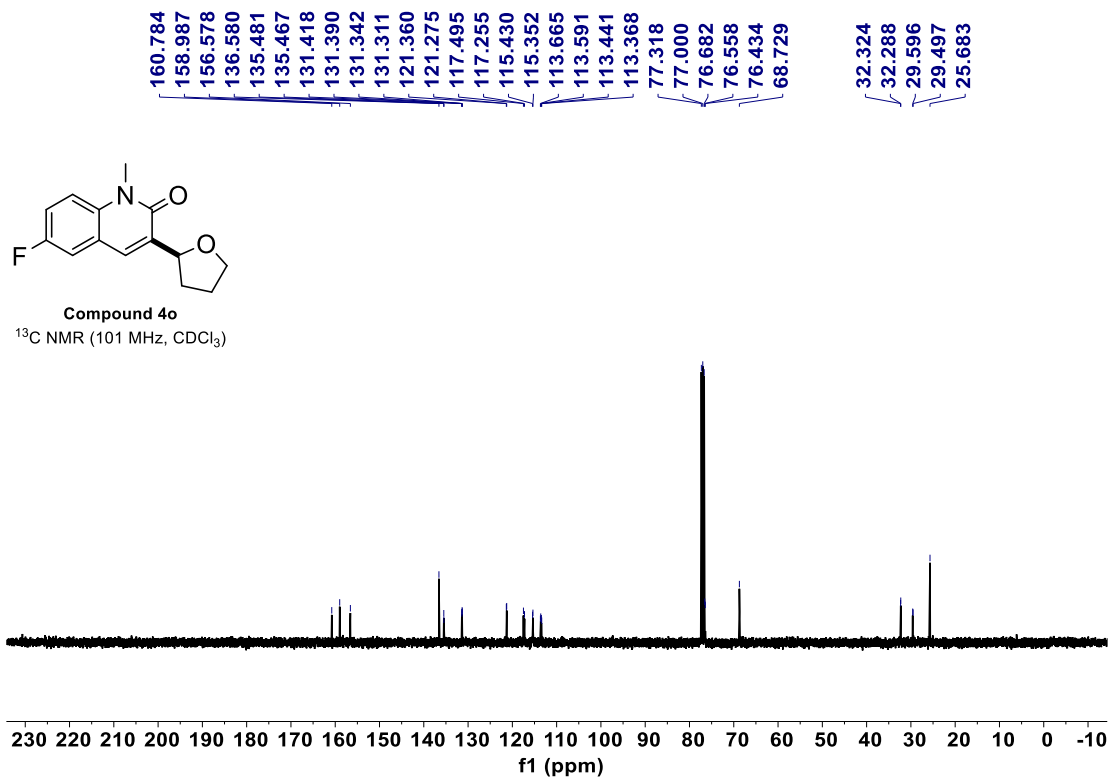

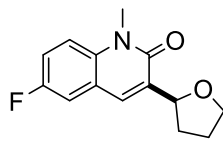

**Compound 4o**  
<sup>19</sup>F NMR (376 MHz, CDCl<sub>3</sub>)

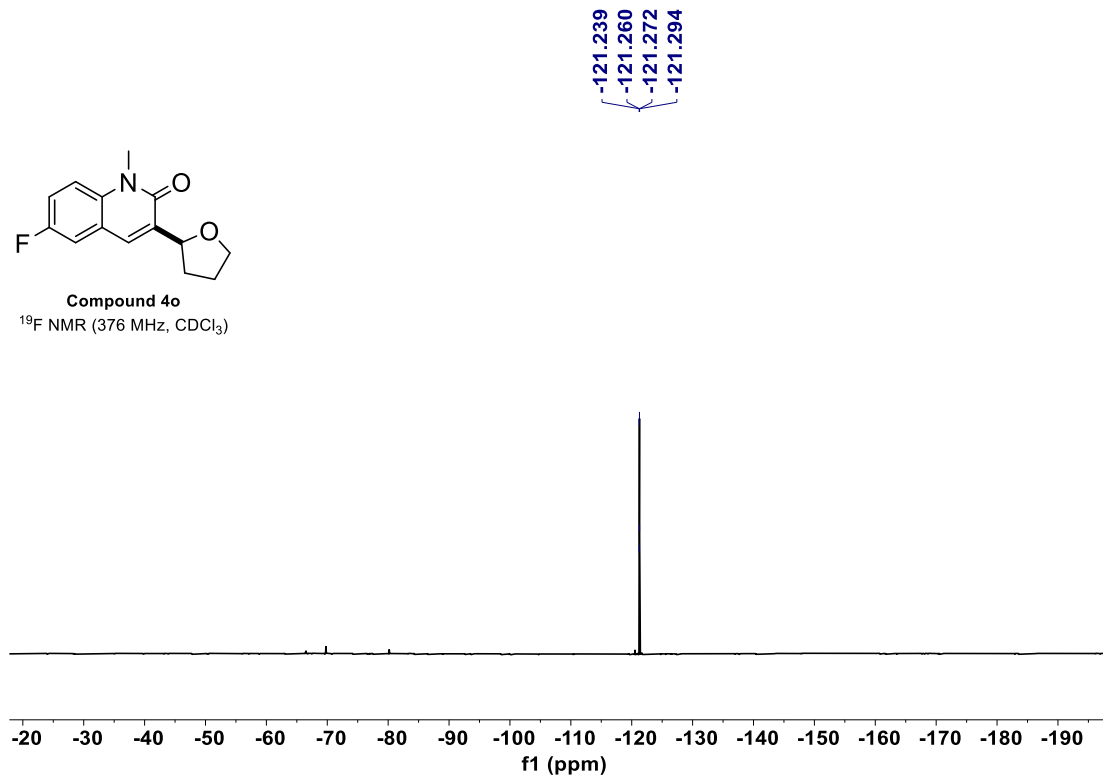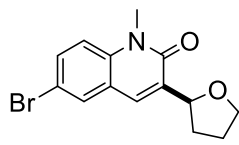

**Compound 4p**  
<sup>1</sup>H NMR (400 MHz, CDCl<sub>3</sub>)

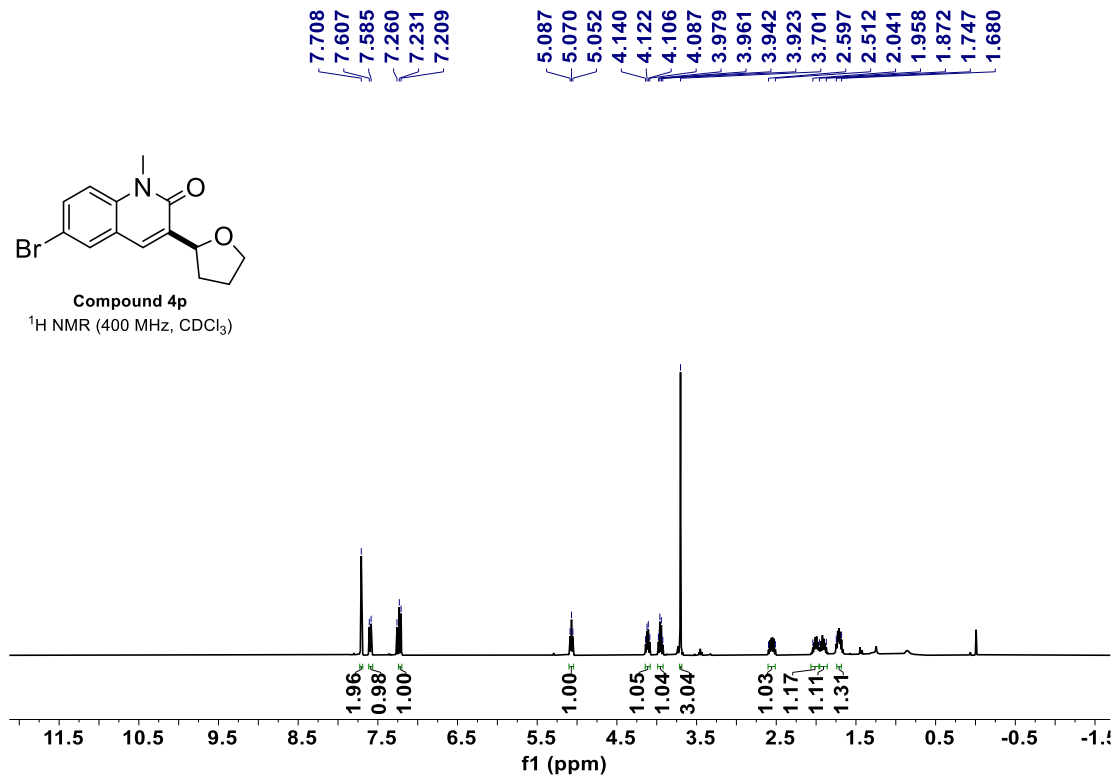

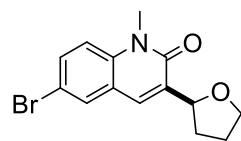

Compound 4p

<sup>13</sup>C NMR (101 MHz, CDCl<sub>3</sub>)

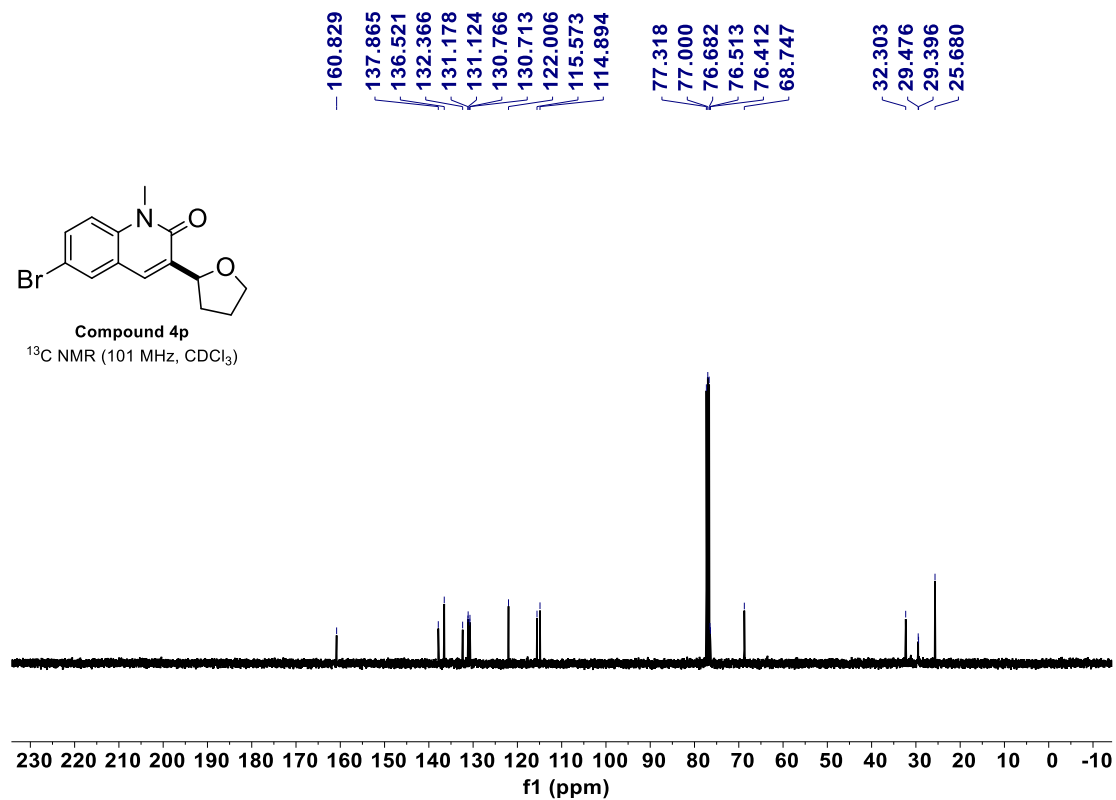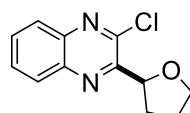

Compound 4q

<sup>1</sup>H NMR (400 MHz, CDCl<sub>3</sub>)

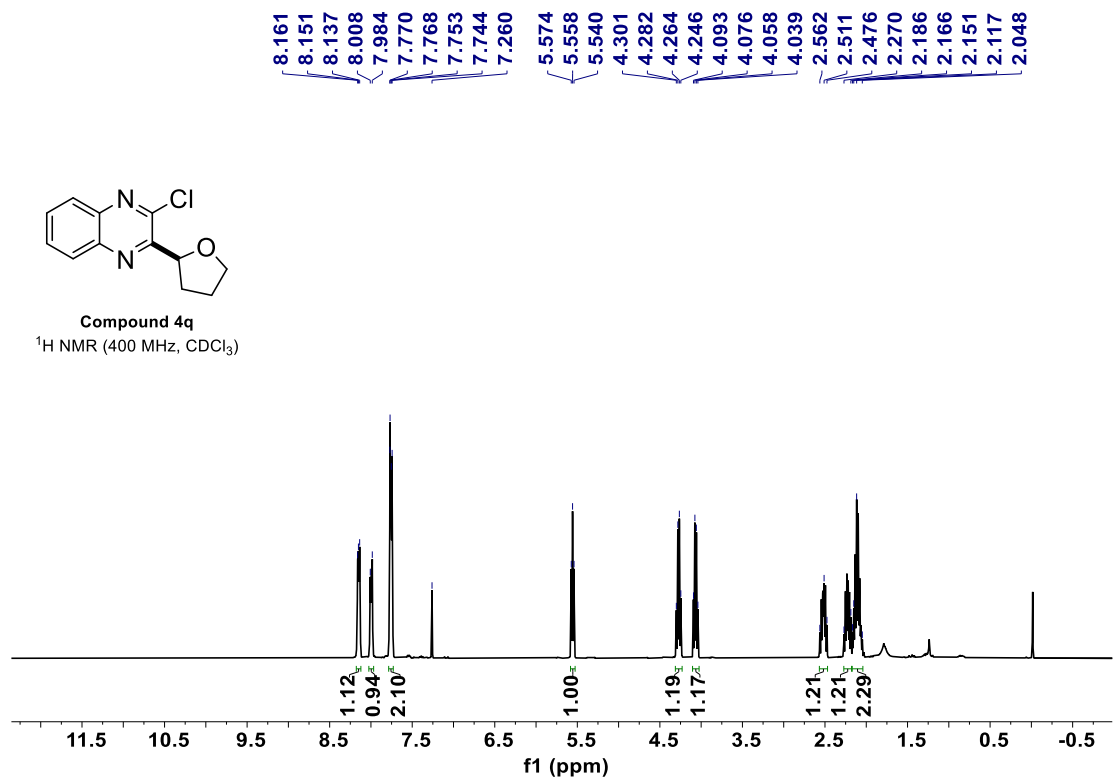



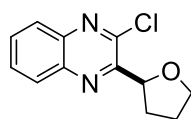

**Compound 4q**  
<sup>13</sup>C NMR (101 MHz, CDCl<sub>3</sub>)

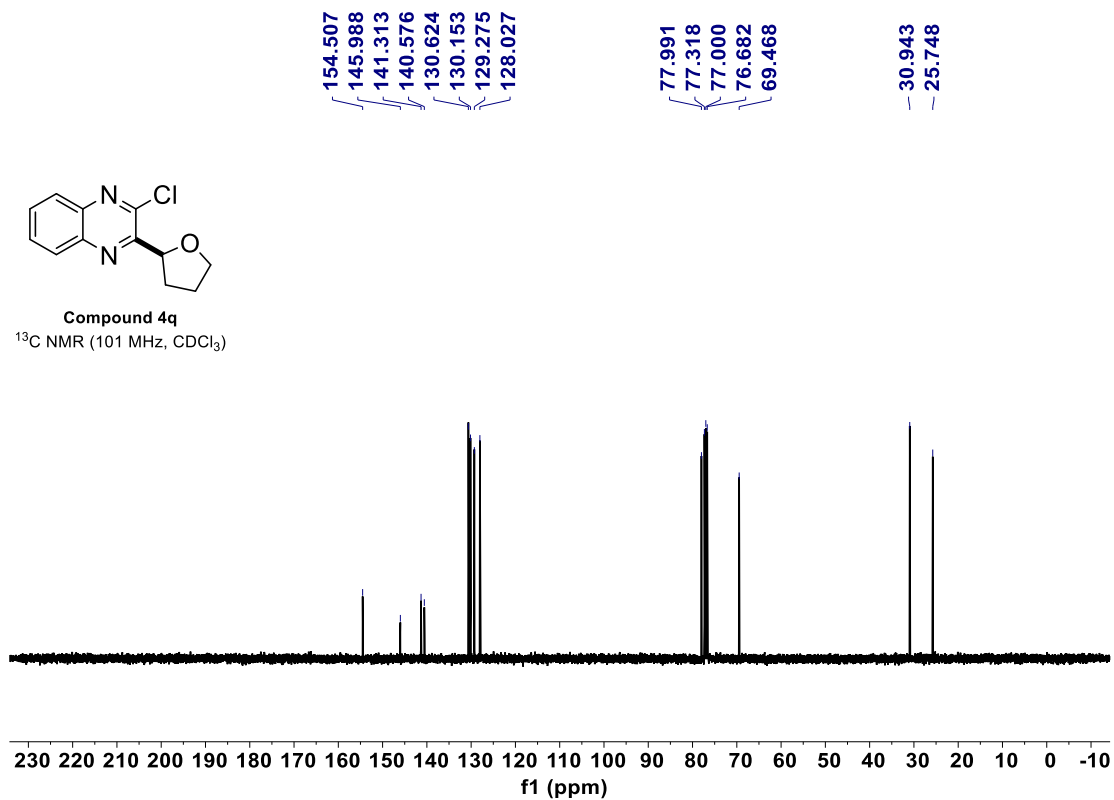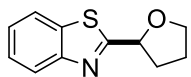

**Compound 4r**  
<sup>1</sup>H NMR (400 MHz, CDCl<sub>3</sub>)

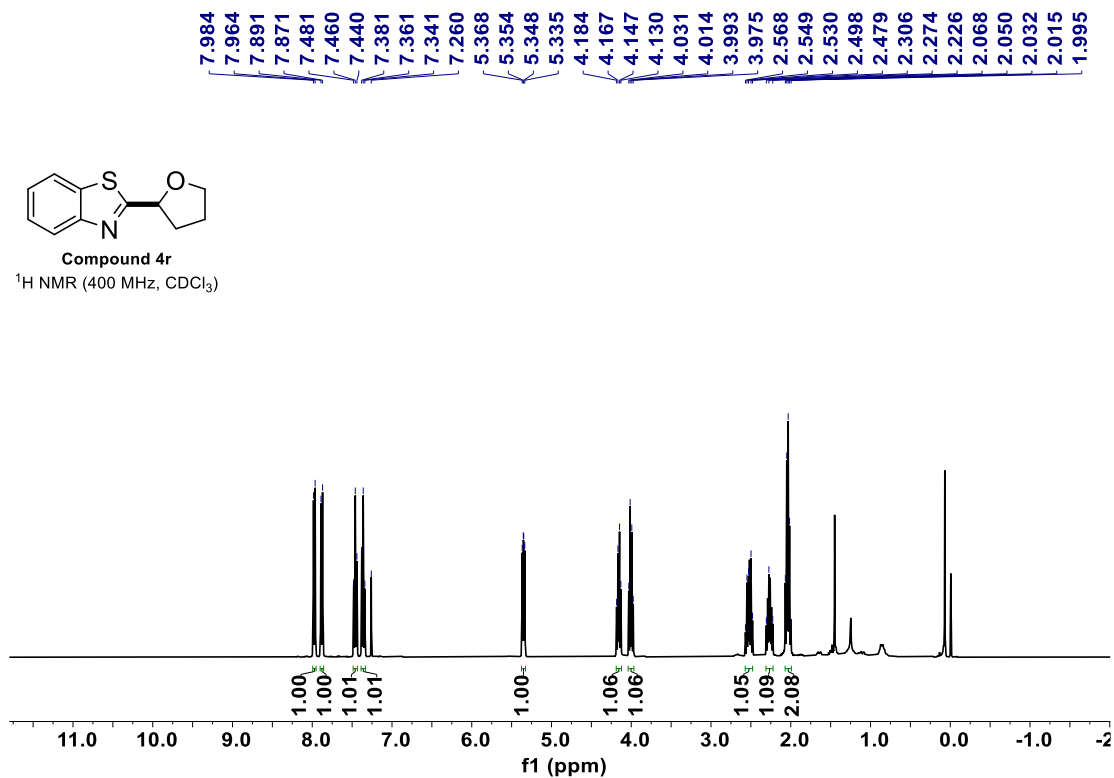

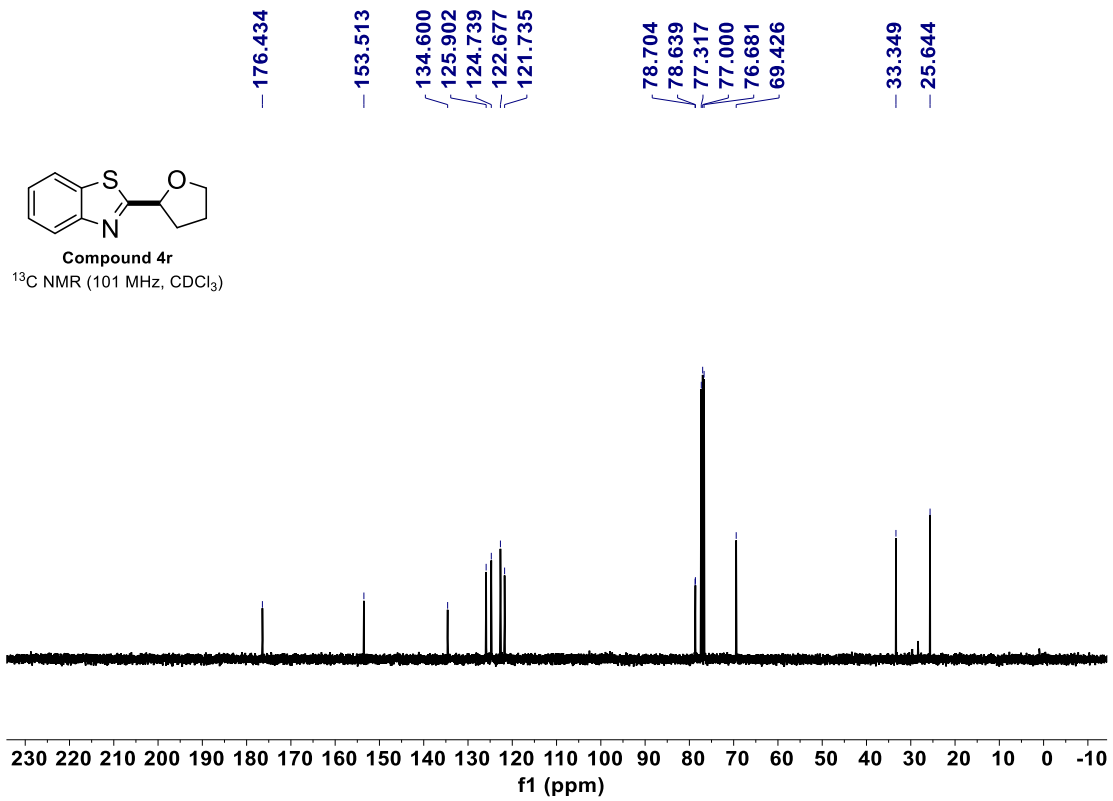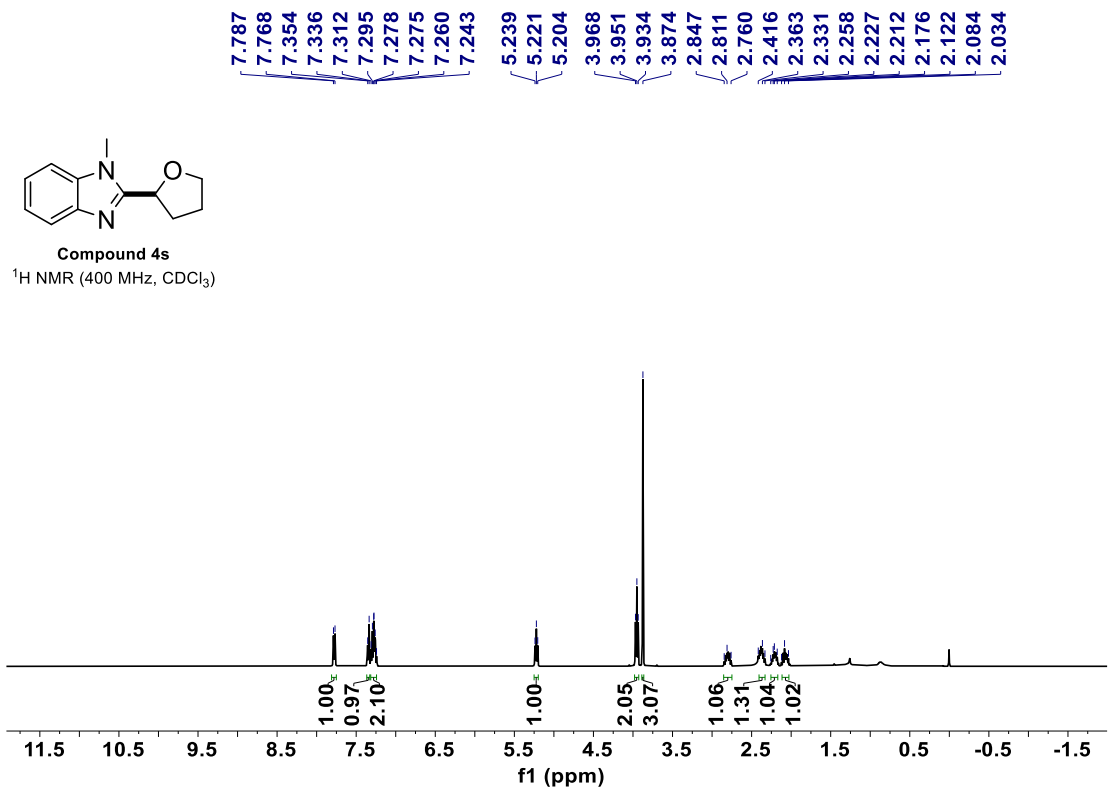

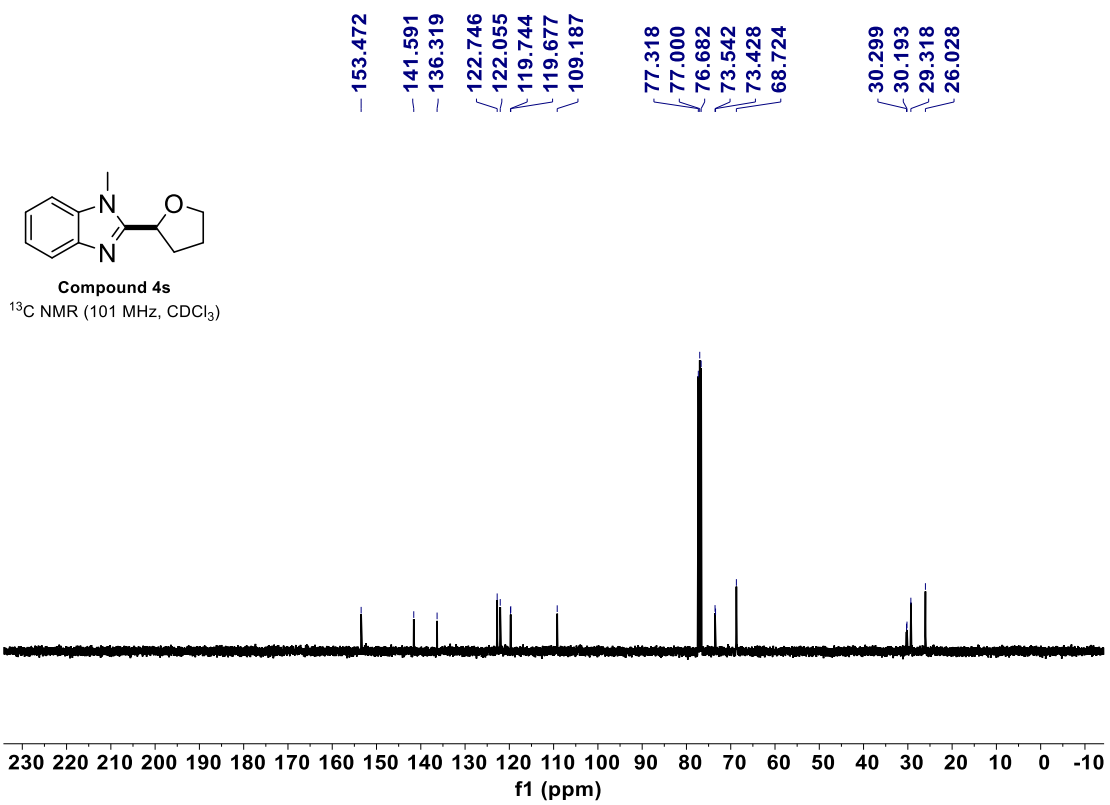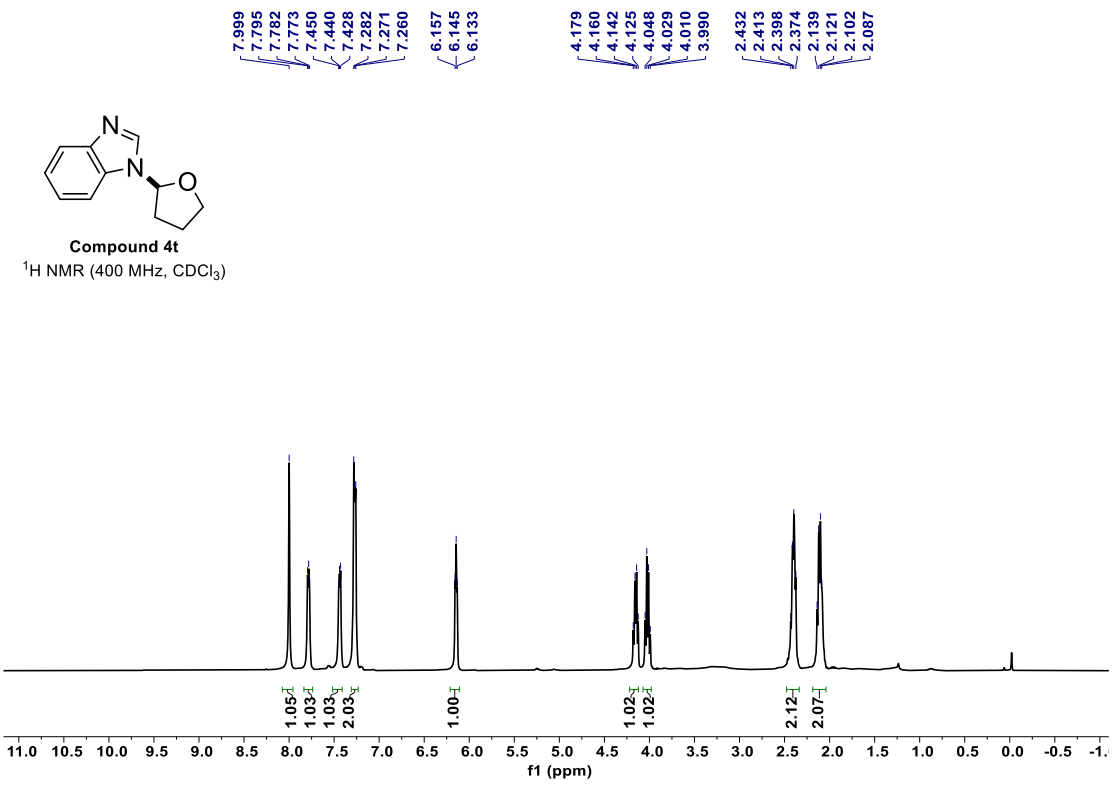

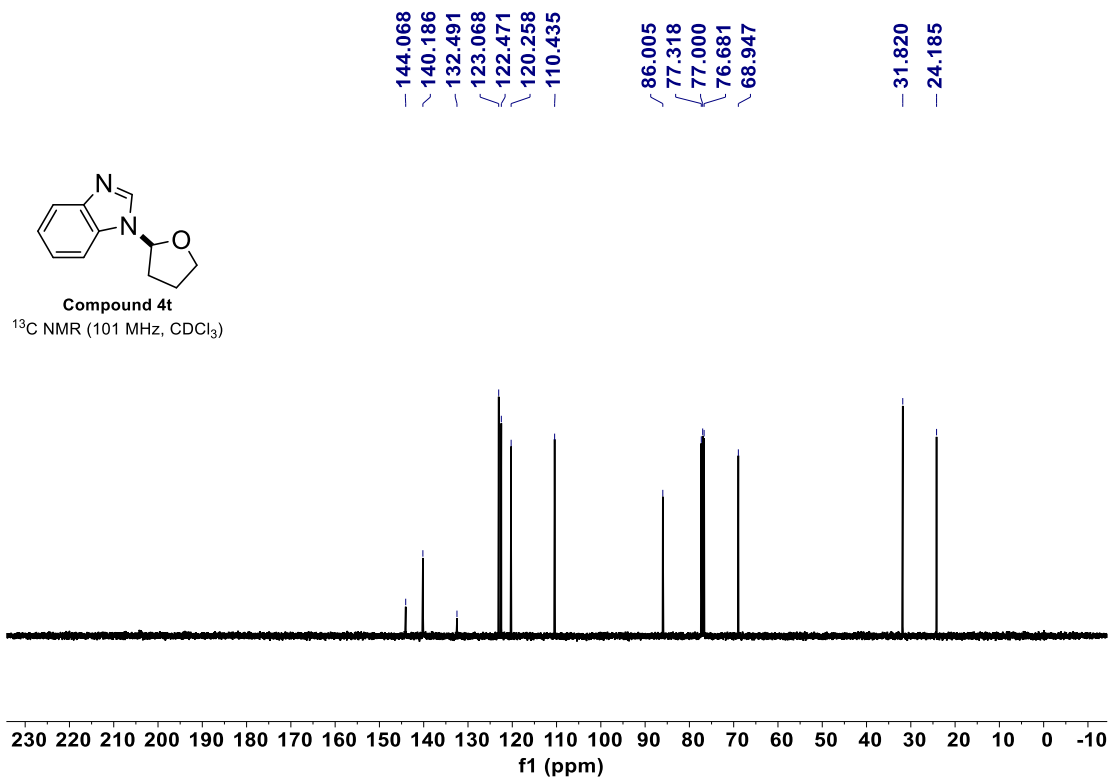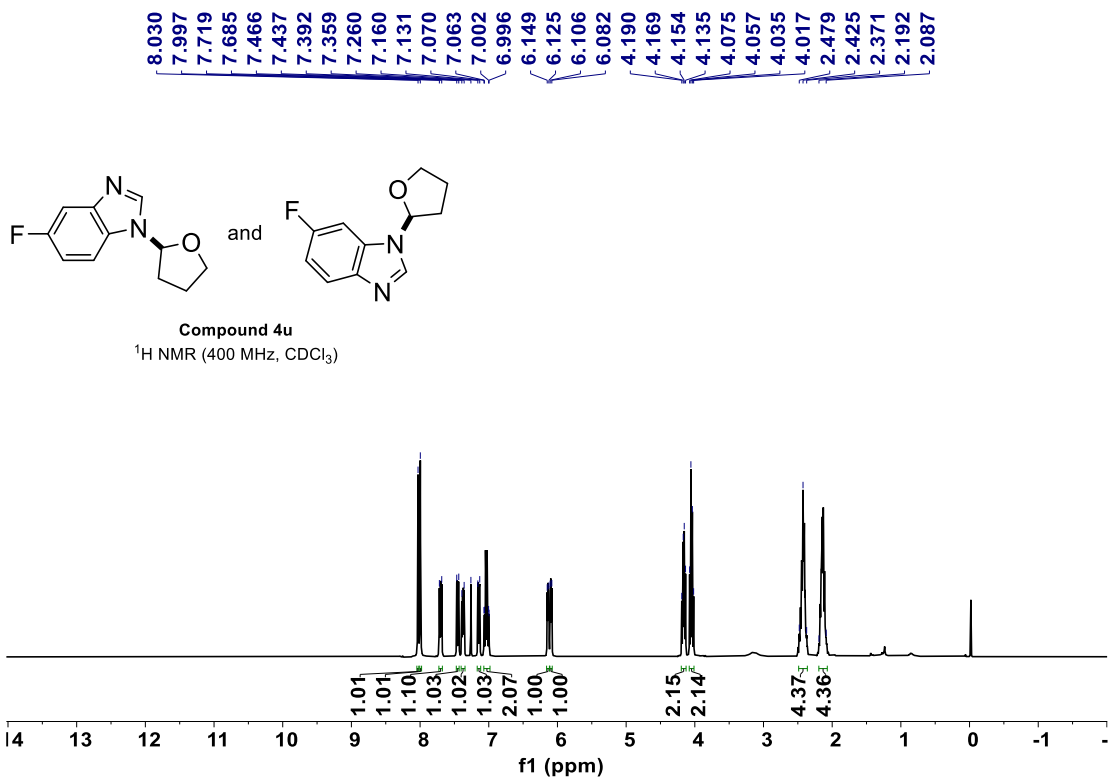



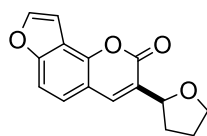

**Compound 4v-1**  
<sup>1</sup>H NMR (400 MHz, CDCl<sub>3</sub>)

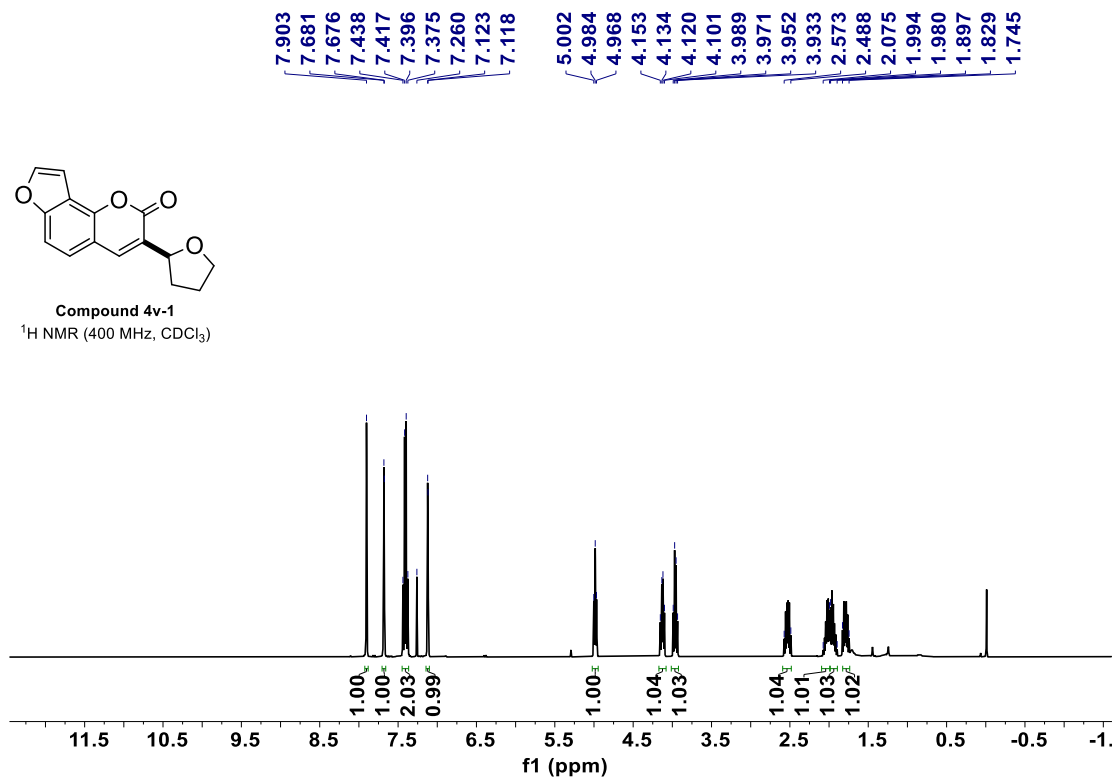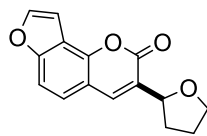

**Compound 4v-1**  
<sup>13</sup>C NMR (101 MHz, CDCl<sub>3</sub>)

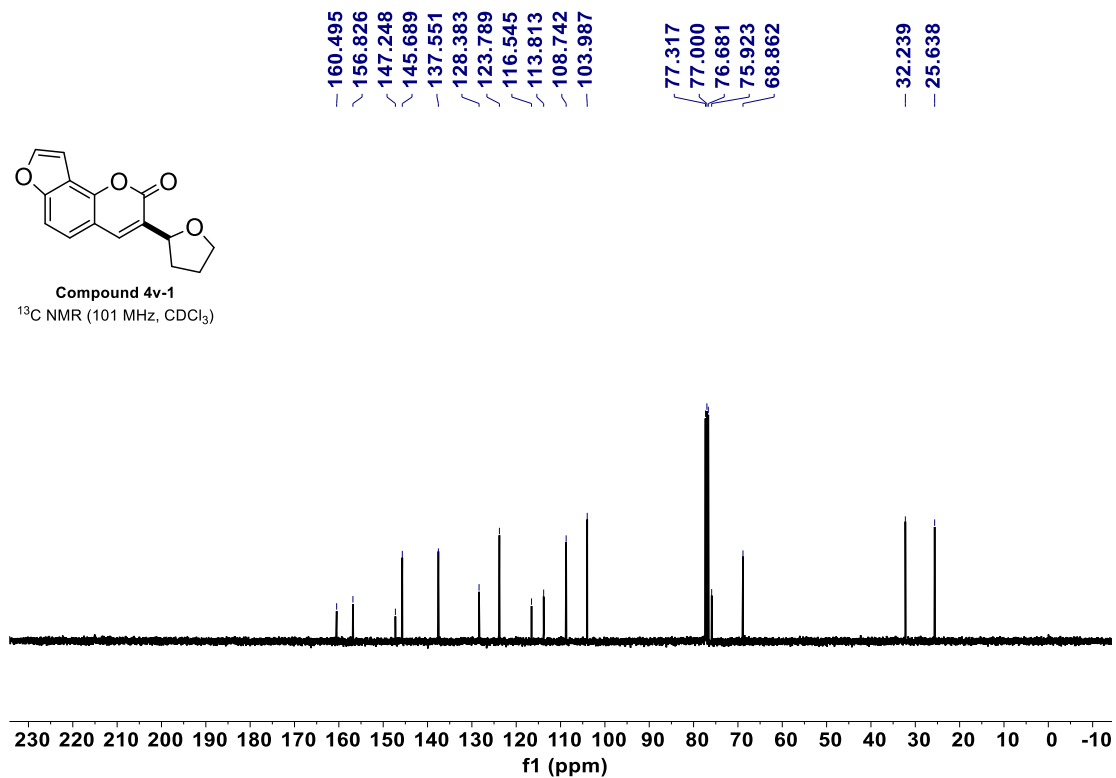

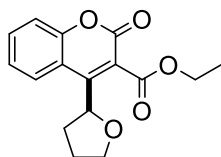

**Compound 4w**

<sup>1</sup>H NMR (400 MHz, CDCl<sub>3</sub>)

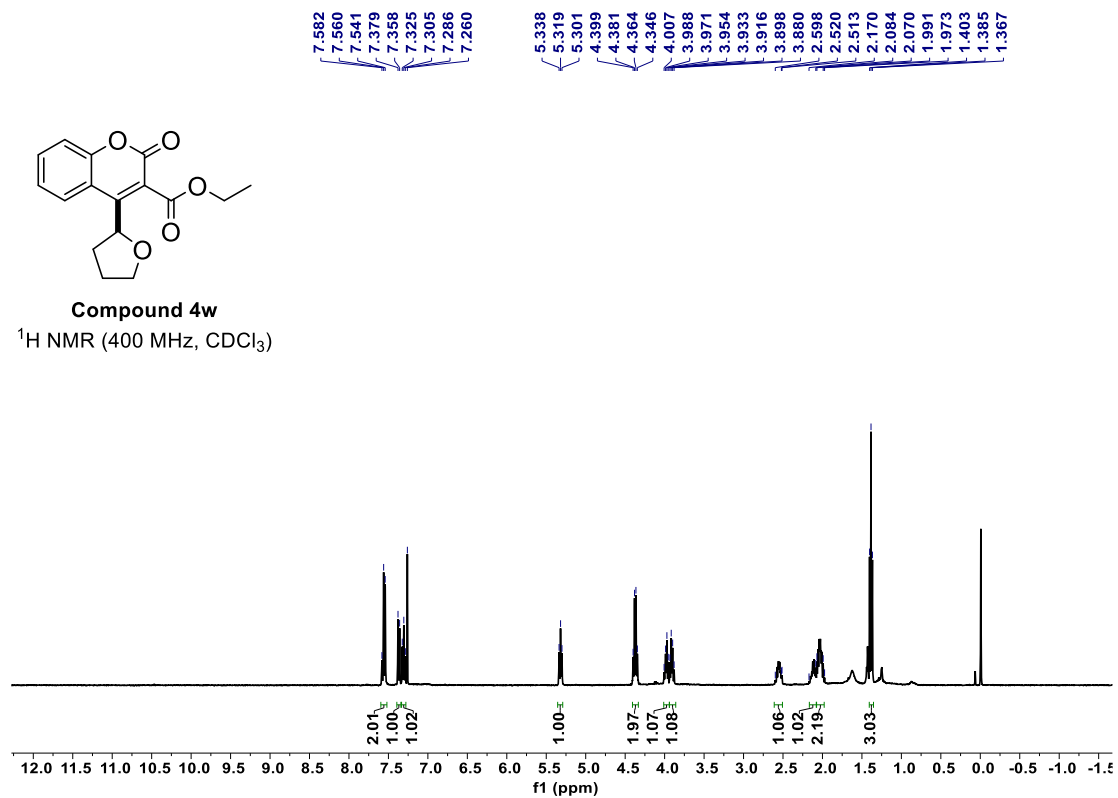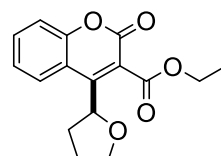

**Compound 4w**

<sup>13</sup>C NMR (101 MHz, CDCl<sub>3</sub>)

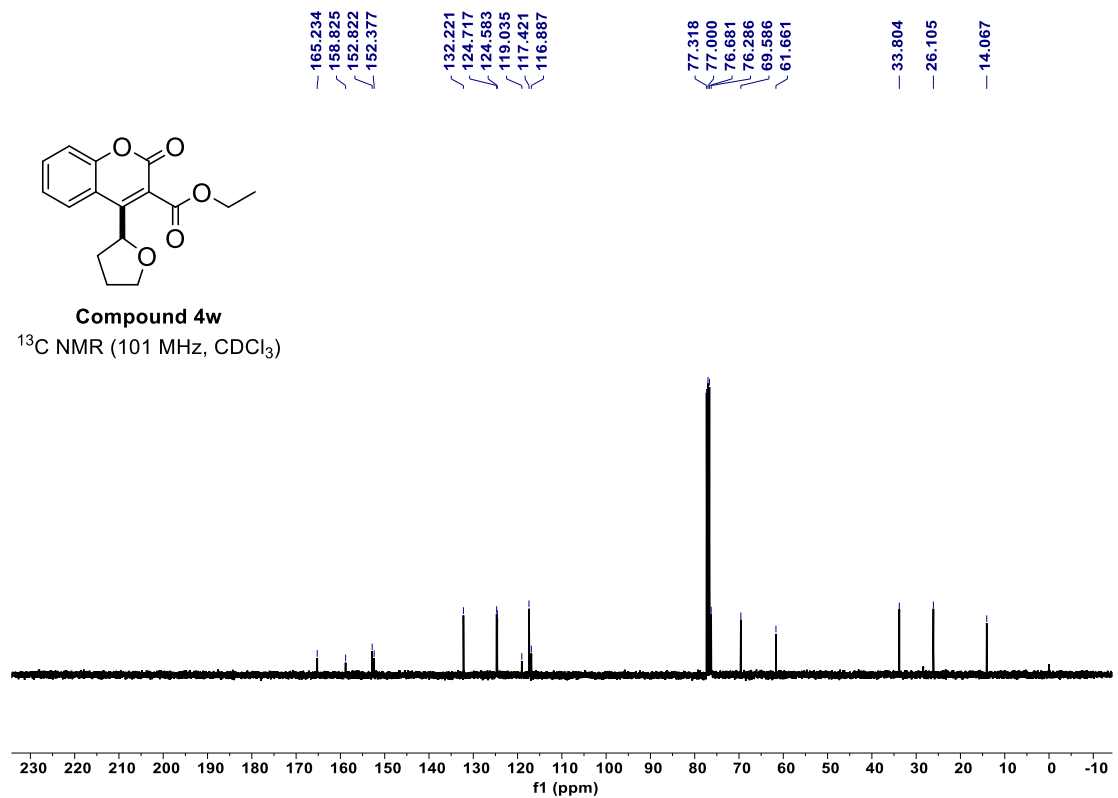

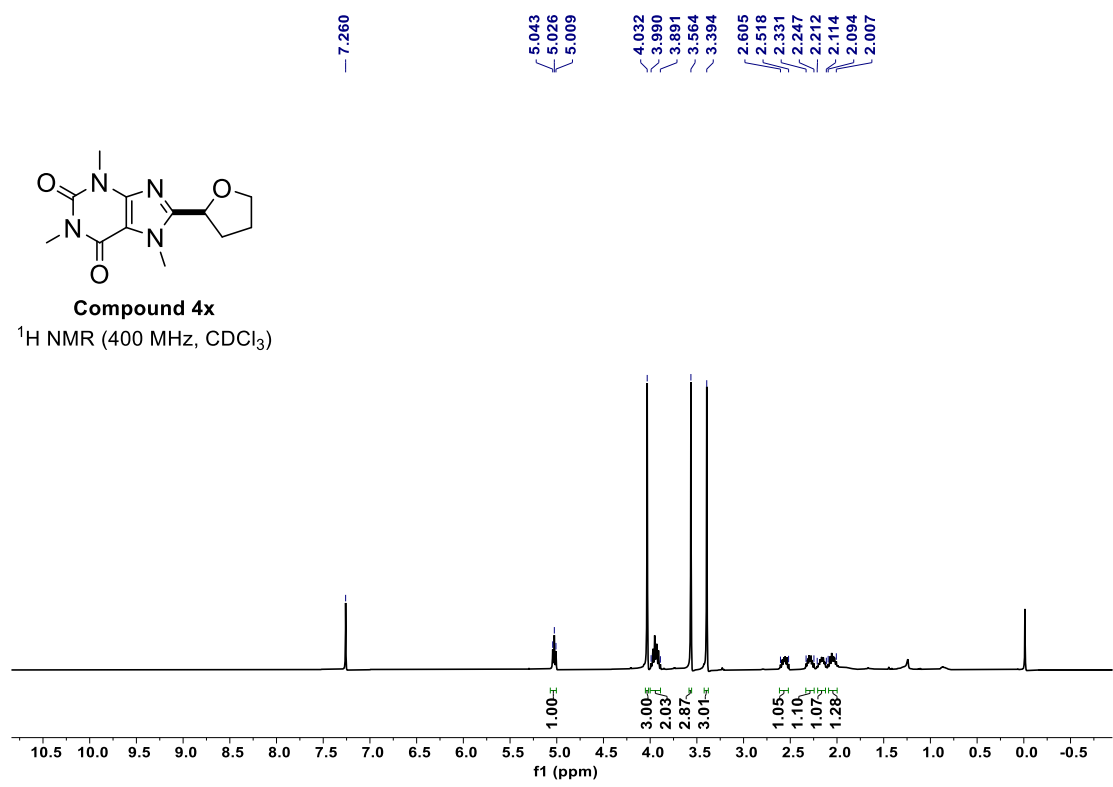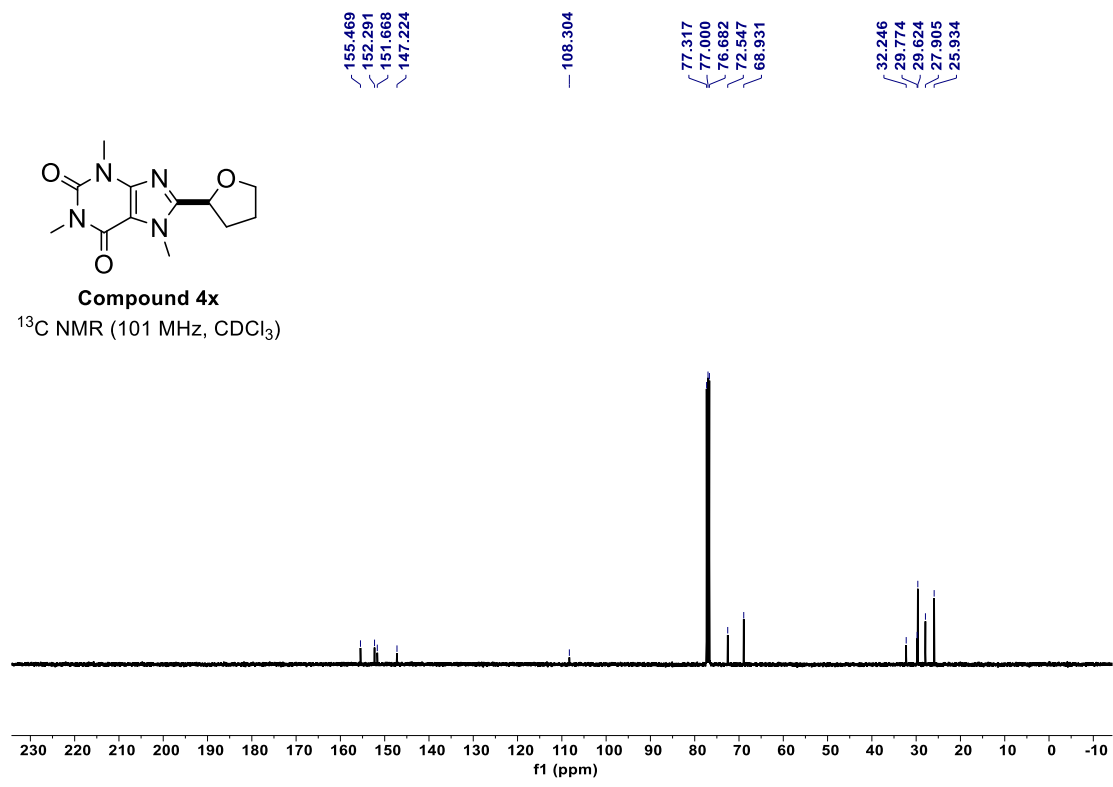



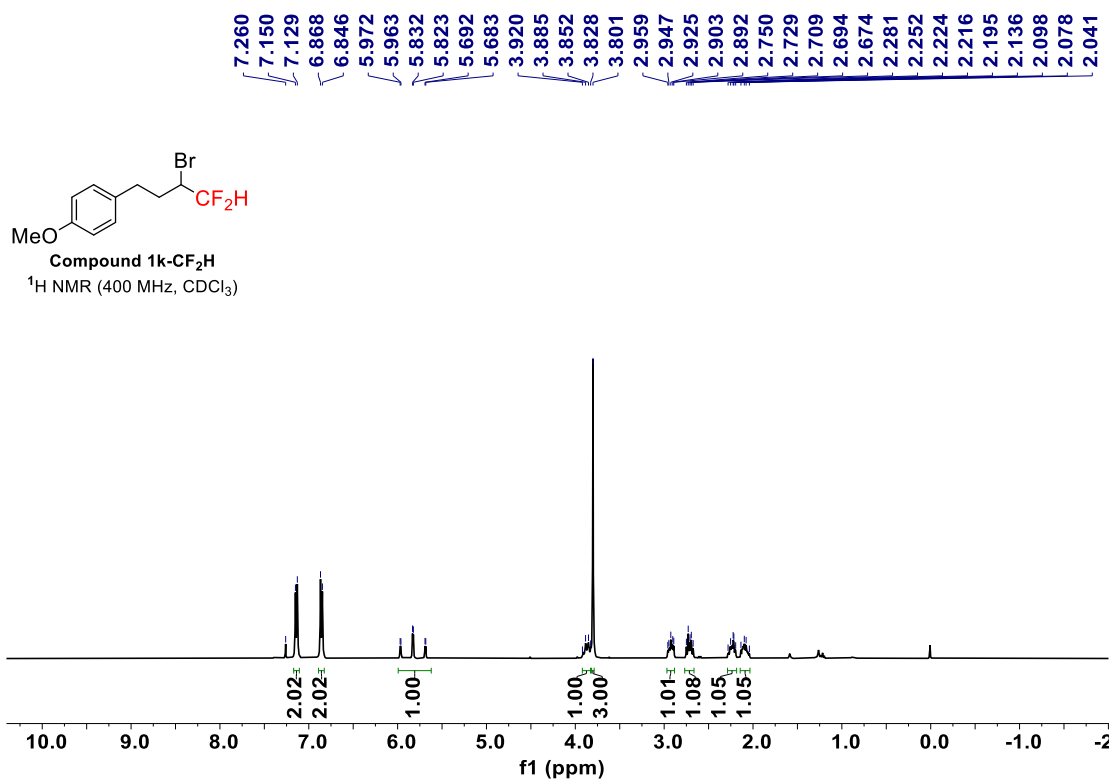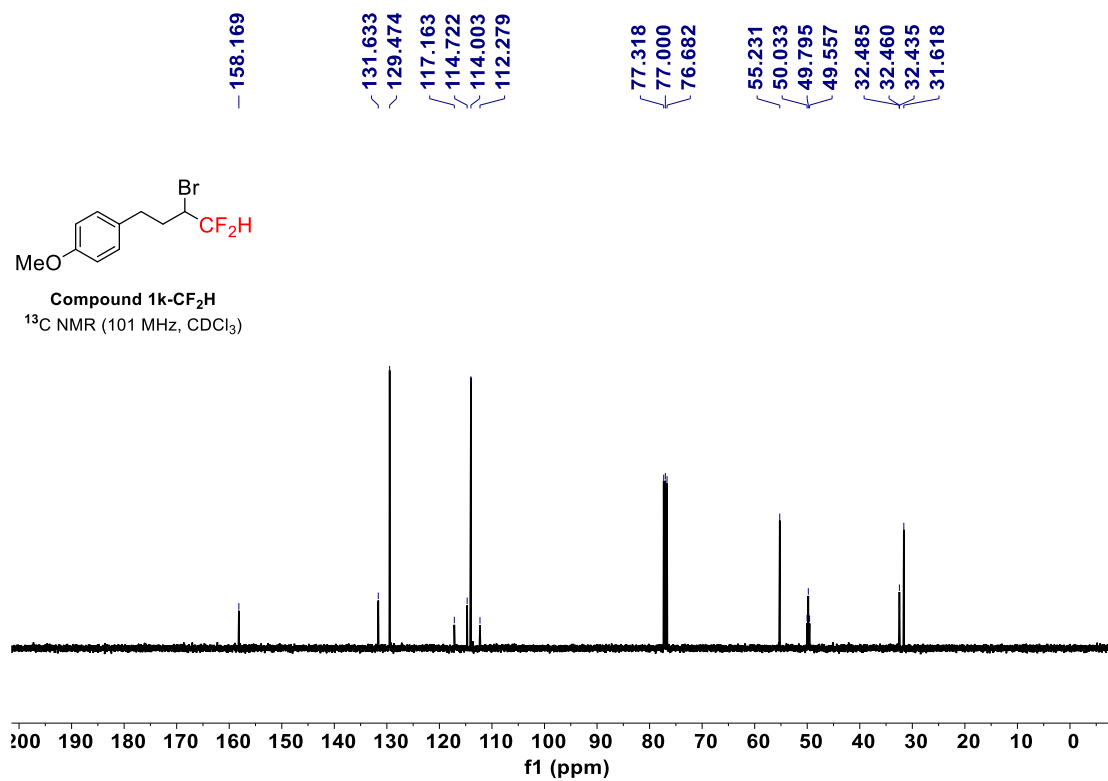

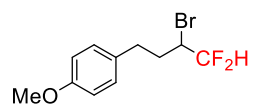

**Compound 1k-CF<sub>2</sub>H**  
<sup>19</sup>F NMR (376 MHz, CDCl<sub>3</sub>)

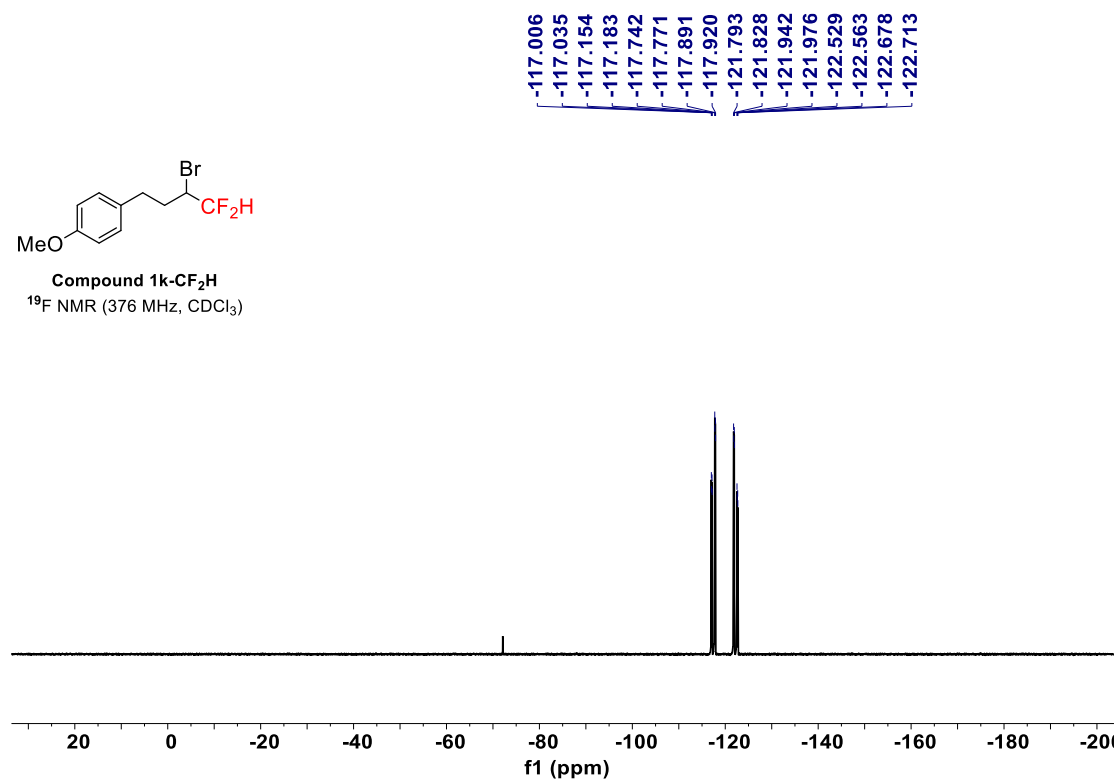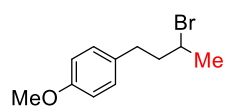

**Compound 1k-CH<sub>3</sub>**  
<sup>1</sup>H NMR (400 MHz, CDCl<sub>3</sub>)

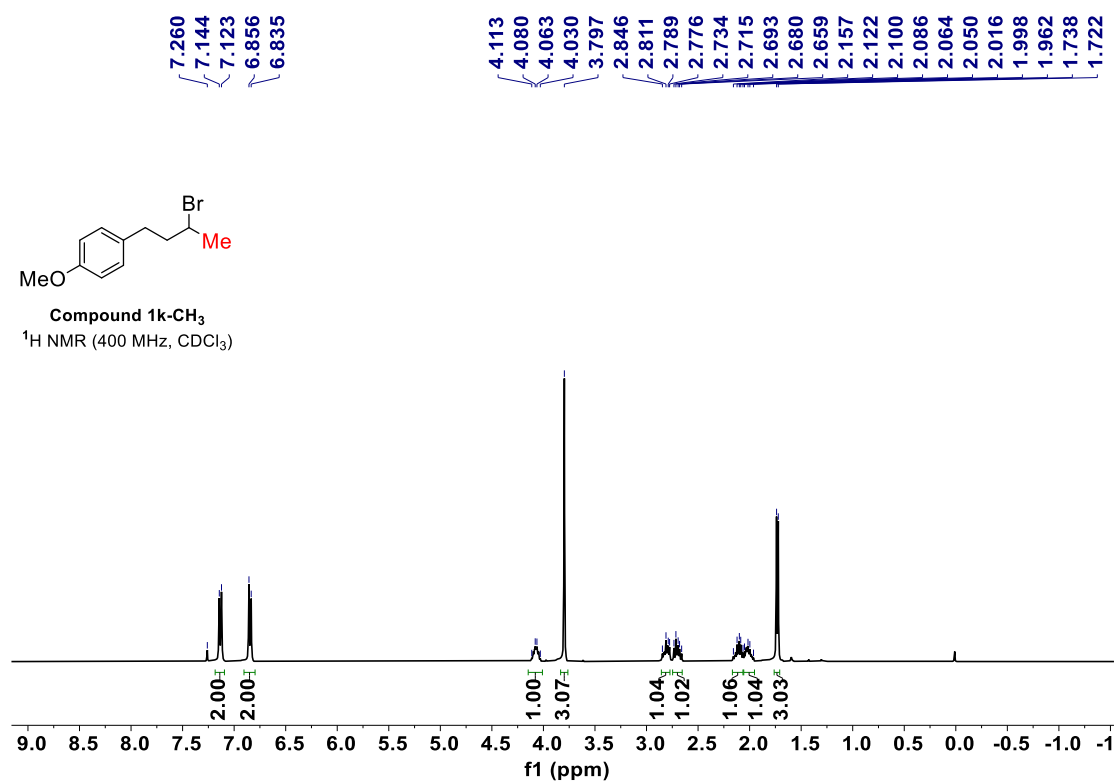

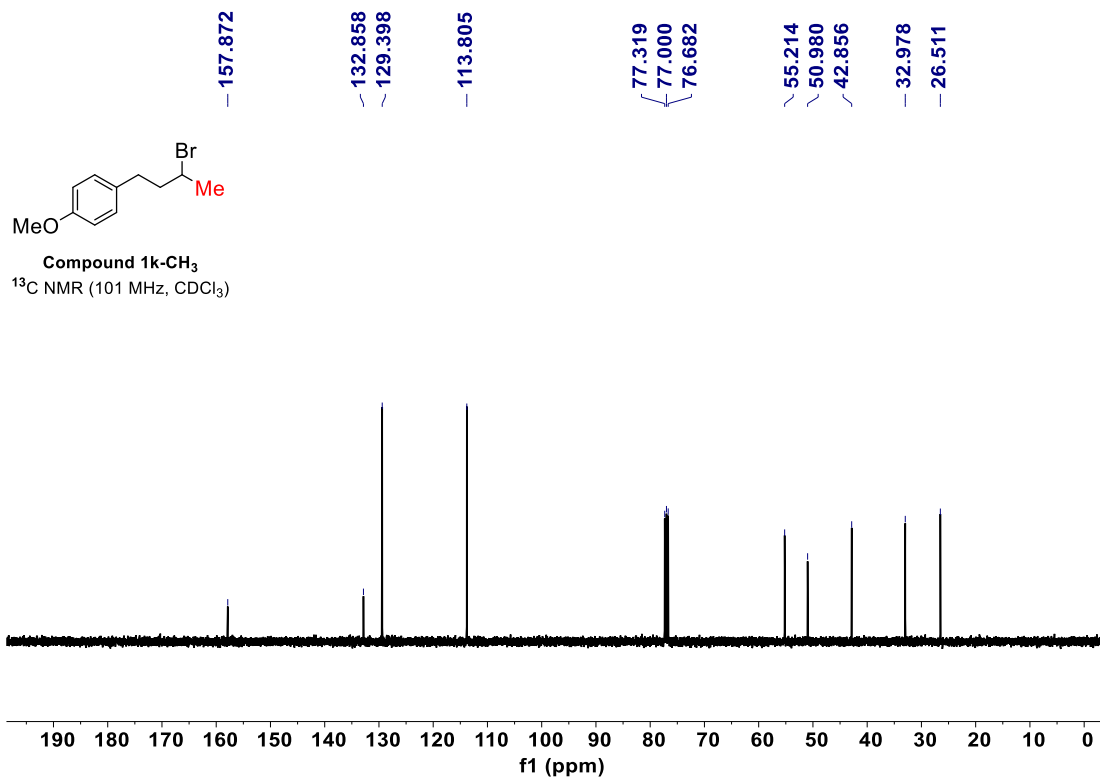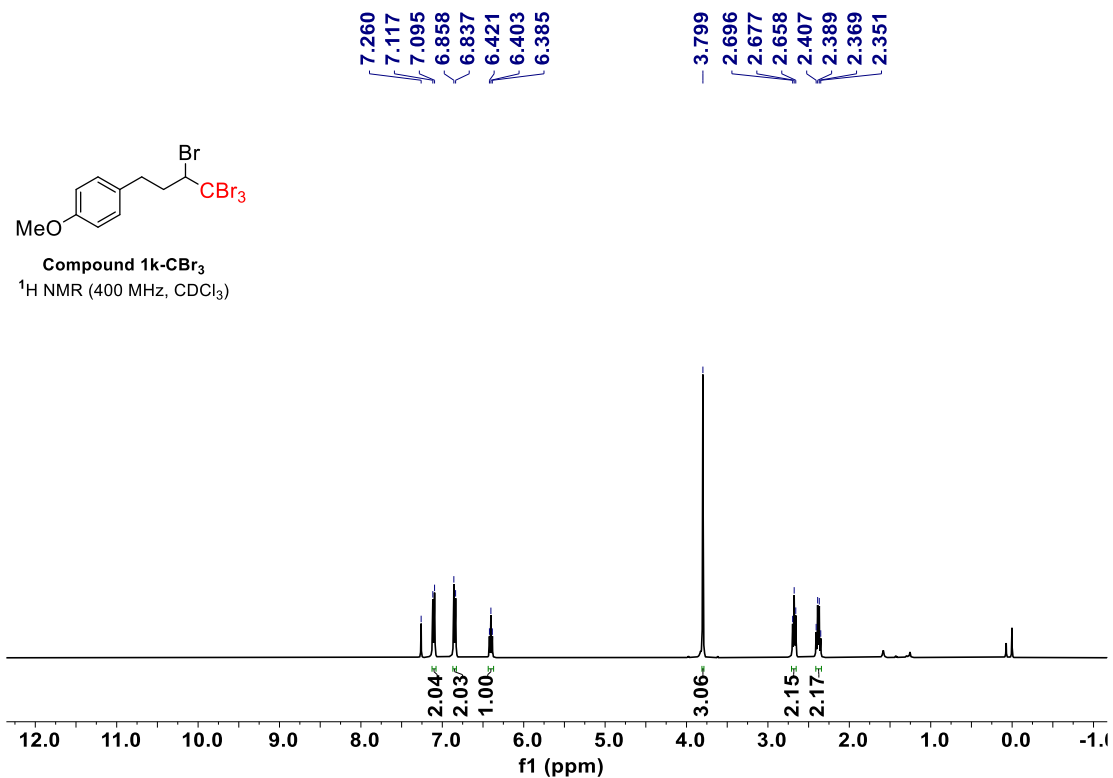

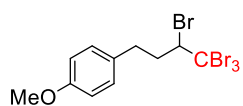

Compound 1k-CBr<sub>3</sub>  
<sup>13</sup>C NMR (101 MHz, CDCl<sub>3</sub>)

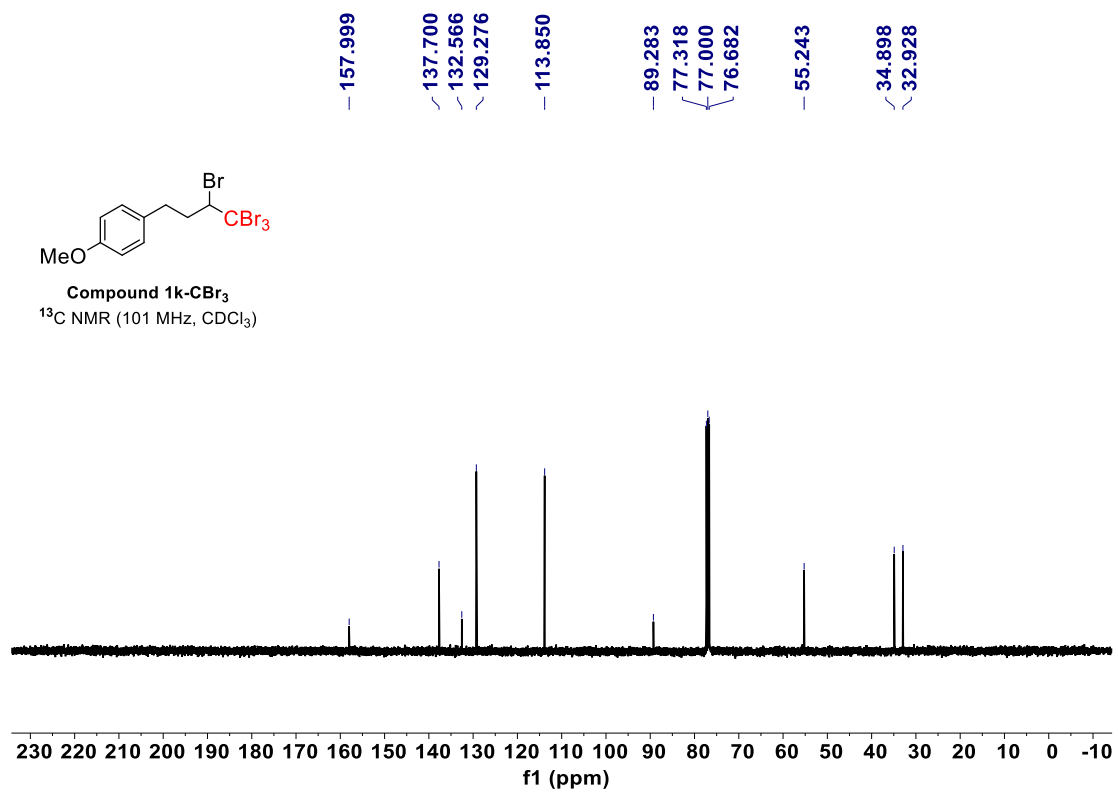

Supplement: d4qo00966e1.pdf [file d4qo00966e1.pdf]
